# Supplementary material for: Systematic comparison between SDS-PAGE/RPLC and high-/low-pH RPLC coupled tandem mass spectrometry strategies in a whole proteome analysis
Source: Royal Society of Chemistry journal article supplement (doi:10.1039/c4an02119c), 2014-12-17
Supplement: c4an02119c3.xlsx [file c4an02119c3.xlsx]

## Sheet: Sheet3
ID	Description	Exp 3	Exp 2	Exp 1	Exp 7	Exp 4	Exp 5	Exp 6
1433B_HUMAN	14-3-3 protein beta/alpha OS=Homo sapiens GN=YWHAB PE=1 SV=3	8.33	3.78	3.27	9.44	1.44	1.19	17.24
1433E_HUMAN	14-3-3 protein epsilon OS=Homo sapiens GN=YWHAE PE=1 SV=1	58.62	27.08	15.4	370.23	5.93	2.64	298.37
1433F_HUMAN	14-3-3 protein eta OS=Homo sapiens GN=YWHAH PE=1 SV=4	7.21	4.27	3.22	9.25	1.43	1.43	7.21
1433G_HUMAN	14-3-3 protein gamma OS=Homo sapiens GN=YWHAG PE=1 SV=2	4.27	4.89	2.78	9.25	1.43	0.94	8.18
1433S_HUMAN	14-3-3 protein sigma OS=Homo sapiens GN=SFN PE=1 SV=1	2.46	2.46	0.97	2.09	0	0	3.86
1433T_HUMAN	14-3-3 protein theta OS=Homo sapiens GN=YWHAQ PE=1 SV=1	8.41	7.42	5.01	12.18	2.43	3.29	15.49
1433Z_HUMAN	14-3-3 protein zeta/delta OS=Homo sapiens GN=YWHAZ PE=1 SV=1	14.05	15.85	9.72	22.65	2.46	2.09	32.19
1A02_HUMAN	HLA class I histocompatibility antigen, A-2 alpha chain OS=Homo sapiens GN=HLA-A PE=1 SV=1	2.18	1.53	0.85	0	0.17	0.36	0
1A1L2_HUMAN	Probable inactive 1-aminocyclopropane-1-carboxylate synthase-like protein 2 OS=Homo sapiens GN=ACCSL PE=2 SV=3	0.05	0	0	0.05	0	0	0
1A69_HUMAN	HLA class I histocompatibility antigen, A-69 alpha chain OS=Homo sapiens GN=HLA-A PE=1 SV=2	0	0	0	0	0	0	0.47
1B07_HUMAN	HLA class I histocompatibility antigen, B-7 alpha chain OS=Homo sapiens GN=HLA-B PE=1 SV=3	1.18	1.02	0	0	0	0	0
1B54_HUMAN	HLA class I histocompatibility antigen, B-54 alpha chain OS=Homo sapiens GN=HLA-B PE=1 SV=1	0.87	0	0	0	0	0	0.37
1B73_HUMAN	HLA class I histocompatibility antigen, B-73 alpha chain OS=Homo sapiens GN=HLA-B PE=1 SV=1	0	0	0.72	0	0	0	0
1C02_HUMAN	HLA class I histocompatibility antigen, Cw-2 alpha chain OS=Homo sapiens GN=HLA-C PE=1 SV=1	0	0.71	0	0	0	0	0
1C06_HUMAN	HLA class I histocompatibility antigen, Cw-6 alpha chain OS=Homo sapiens GN=HLA-C PE=2 SV=2	0	0	0.71	0	0	0	0.71
1C07_HUMAN	HLA class I histocompatibility antigen, Cw-7 alpha chain OS=Homo sapiens GN=HLA-C PE=1 SV=3	0	0	0	0.17	0.17	0.26	0
1C15_HUMAN	HLA class I histocompatibility antigen, Cw-15 alpha chain OS=Homo sapiens GN=HLA-C PE=1 SV=1	0	0	0	0	0	0	0.59
2A5A_HUMAN	Serine/threonine-protein phosphatase 2A 56 kDa regulatory subunit alpha isoform OS=Homo sapiens GN=PPP2R5A PE=1 SV=1	0.19	0.25	0.06	0.12	0	0.06	0.33
2A5D_HUMAN	Serine/threonine-protein phosphatase 2A 56 kDa regulatory subunit delta isoform OS=Homo sapiens GN=PPP2R5D PE=1 SV=1	1.28	0.98	0.51	1.17	0.15	0.2	0.58
2A5E_HUMAN	Serine/threonine-protein phosphatase 2A 56 kDa regulatory subunit epsilon isoform OS=Homo sapiens GN=PPP2R5E PE=1 SV=1	0.69	0.34	0.19	0.5	0.06	0.06	0.79
2A5G_HUMAN	Serine/threonine-protein phosphatase 2A 56 kDa regulatory subunit gamma isoform OS=Homo sapiens GN=PPP2R5C PE=1 SV=3	0.6	0.6	0.23	0.44	0.11	0	0.52
2AAA_HUMAN	Serine/threonine-protein phosphatase 2A 65 kDa regulatory subunit A alpha isoform OS=Homo sapiens GN=PPP2R1A PE=1 SV=4	2.71	2.53	1.64	7.47	0.79	0.71	6.68
2AAB_HUMAN	Serine/threonine-protein phosphatase 2A 65 kDa regulatory subunit A beta isoform OS=Homo sapiens GN=PPP2R1B PE=1 SV=3	0.96	0.87	0.87	1.26	0.21	0.15	1.16
2ABA_HUMAN	Serine/threonine-protein phosphatase 2A 55 kDa regulatory subunit B alpha isoform OS=Homo sapiens GN=PPP2R2A PE=1 SV=1	1.09	1.36	0.84	1.66	0.06	0.28	2.4
2ABD_HUMAN	Serine/threonine-protein phosphatase 2A 55 kDa regulatory subunit B delta isoform OS=Homo sapiens GN=PPP2R2D PE=2 SV=1	0	0.73	0	0.35	0	0	0.63
2ABG_HUMAN	Serine/threonine-protein phosphatase 2A 55 kDa regulatory subunit B gamma isoform OS=Homo sapiens GN=PPP2R2C PE=2 SV=4	0	0	0	0.13	0	0	0
3BP1_HUMAN	SH3 domain-binding protein 1 OS=Homo sapiens GN=SH3BP1 PE=1 SV=3	0.66	0.4	0.24	0.59	0	0.14	0.14
3BP5L_HUMAN	SH3 domain-binding protein 5-like OS=Homo sapiens GN=SH3BP5L PE=1 SV=1	0.08	0.24	0	0	0	0	0.16
3BP5_HUMAN	SH3 domain-binding protein 5 OS=Homo sapiens GN=SH3BP5 PE=1 SV=2	0	0.06	0	0	0	0	0
3HAO_HUMAN	3-hydroxyanthranilate 3,4-dioxygenase OS=Homo sapiens GN=HAAO PE=1 SV=2	0	0.1	0	0	0	0	0.1
3HIDH_HUMAN	3-hydroxyisobutyrate dehydrogenase, mitochondrial OS=Homo sapiens GN=HIBADH PE=1 SV=2	0.7	1.43	0.3	2.78	0.56	0.43	9.96
3MG_HUMAN	DNA-3-methyladenine glycosylase OS=Homo sapiens GN=MPG PE=1 SV=3	1.84	1.35	1.59	1.14	0.33	0.46	0.61
41_HUMAN	Protein 4.1 OS=Homo sapiens GN=EPB41 PE=1 SV=4	1.36	0.87	0.49	0.44	0.1	0.18	0.35
4EBP1_HUMAN	Eukaryotic translation initiation factor 4E-binding protein 1 OS=Homo sapiens GN=EIF4EBP1 PE=1 SV=3	2.31	2.31	1.61	1.61	0	0	0
4EBP2_HUMAN	Eukaryotic translation initiation factor 4E-binding protein 2 OS=Homo sapiens GN=EIF4EBP2 PE=1 SV=1	1.53	0.59	0	0	0	0	0
4ET_HUMAN	Eukaryotic translation initiation factor 4E transporter OS=Homo sapiens GN=EIF4ENIF1 PE=1 SV=2	0.23	0.31	0.13	0.06	0	0	0.06
4F2_HUMAN	4F2 cell-surface antigen heavy chain OS=Homo sapiens GN=SLC3A2 PE=1 SV=3	2.24	1.82	1.12	3.1	0.76	0.84	2.09
5HT7R_HUMAN	5-hydroxytryptamine receptor 7 OS=Homo sapiens GN=HTR7 PE=1 SV=2	0	0	0	0.06	0	0	0
5NT3A_HUMAN	Cytosolic 5'-nucleotidase 3A OS=Homo sapiens GN=NT5C3A PE=1 SV=3	0.79	0.79	0	0.18	0.18	0.28	0.28
5NT3B_HUMAN	7-methylguanosine phosphate-specific 5'-nucleotidase OS=Homo sapiens GN=NT5C3B PE=1 SV=4	0.9	0.73	0.2	0.9	0.1	0.32	2
5NTC_HUMAN	Cytosolic purine 5'-nucleotidase OS=Homo sapiens GN=NT5C2 PE=1 SV=1	0.48	0.41	0.22	0.48	0	0.16	0.41
5NTD_HUMAN	5'-nucleotidase OS=Homo sapiens GN=NT5E PE=1 SV=1	0	0	0	0.05	0	0	0
68MP_HUMAN	6.8 kDa mitochondrial proteolipid OS=Homo sapiens GN=MP68 PE=1 SV=1	0.54	0	0.54	0	0	0	0
6PGD_HUMAN	6-phosphogluconate dehydrogenase, decarboxylating OS=Homo sapiens GN=PGD PE=1 SV=3	1.76	2.1	1.17	2.94	1.6	0.82	4.98
6PGL_HUMAN	6-phosphogluconolactonase OS=Homo sapiens GN=PGLS PE=1 SV=2	3.34	2.88	2.09	5.1	0.97	0.97	2.09
8ODP_HUMAN	7,8-dihydro-8-oxoguanine triphosphatase OS=Homo sapiens GN=NUDT1 PE=1 SV=3	0.51	0.51	0.74	0.51	0.15	0.15	0.51
A16A1_HUMAN	Aldehyde dehydrogenase family 16 member A1 OS=Homo sapiens GN=ALDH16A1 PE=1 SV=2	0.57	0.45	0.25	0.51	0.08	0.12	0.4
A16L1_HUMAN	Autophagy-related protein 16-1 OS=Homo sapiens GN=ATG16L1 PE=1 SV=2	0.52	0.39	0.1	0.15	0	0.1	0.1
A1ATR_HUMAN	Putative alpha-1-antitrypsin-related protein OS=Homo sapiens GN=SERPINA2P PE=5 SV=1	0.07	0	0.07	0.07	0	0	0
A1AT_HUMAN	Alpha-1-antitrypsin OS=Homo sapiens GN=SERPINA1 PE=1 SV=3	0.07	0.23	0	0	0	0	0
A1BG_HUMAN	Alpha-1B-glycoprotein OS=Homo sapiens GN=A1BG PE=1 SV=4	0.06	0.06	0	0	0	0	0
A1CF_HUMAN	APOBEC1 complementation factor OS=Homo sapiens GN=A1CF PE=1 SV=1	0.28	0.16	0.1	0	0	0.05	0
A2AP_HUMAN	Alpha-2-antiplasmin OS=Homo sapiens GN=SERPINF2 PE=1 SV=3	0.06	0.06	0.06	0	0	0	0
A2MG_HUMAN	Alpha-2-macroglobulin OS=Homo sapiens GN=A2M PE=1 SV=3	0.17	0.1	0.06	0.08	0.06	0.06	0.06
A2ML1_HUMAN	Alpha-2-macroglobulin-like protein 1 OS=Homo sapiens GN=A2ML1 PE=1 SV=3	0	0	0	0.02	0	0	0
A4_HUMAN	Amyloid beta A4 protein OS=Homo sapiens GN=APP PE=1 SV=3	0.29	0.34	0.04	0.04	0	0	0.04
A7L3B_HUMAN	Putative ataxin-7-like protein 3B OS=Homo sapiens GN=ATXN7L3B PE=3 SV=2	1.95	0.72	0.72	0.72	0	0	0.31
AAAS_HUMAN	Aladin OS=Homo sapiens GN=AAAS PE=1 SV=1	0.99	0.79	0.37	0.79	0.53	0.37	0.79
AAAT_HUMAN	Neutral amino acid transporter B(0) OS=Homo sapiens GN=SLC1A5 PE=1 SV=2	0.96	0.96	0.57	1.07	0.48	0.32	0.75
AACS_HUMAN	Acetoacetyl-CoA synthetase OS=Homo sapiens GN=AACS PE=1 SV=1	0.29	0.29	0.04	0.35	0.09	0.24	0.18
AAGAB_HUMAN	Alpha- and gamma-adaptin-binding protein p34 OS=Homo sapiens GN=AAGAB PE=1 SV=1	0.31	0.31	0.31	0	0.09	0.09	0
AAK1_HUMAN	AP2-associated protein kinase 1 OS=Homo sapiens GN=AAK1 PE=1 SV=3	0.36	0.32	0.1	0.24	0.03	0	0.1
AAKB1_HUMAN	5'-AMP-activated protein kinase subunit beta-1 OS=Homo sapiens GN=PRKAB1 PE=1 SV=4	0.86	0.68	0.23	0.23	0.11	0.11	0
AAKB2_HUMAN	5'-AMP-activated protein kinase subunit beta-2 OS=Homo sapiens GN=PRKAB2 PE=1 SV=1	0.51	0.23	0	0	0	0	0.86
AAKG1_HUMAN	5'-AMP-activated protein kinase subunit gamma-1 OS=Homo sapiens GN=PRKAG1 PE=1 SV=1	0.96	1.13	0.52	1.74	0.4	0.52	0.66
AAKG3_HUMAN	5'-AMP-activated protein kinase subunit gamma-3 OS=Homo sapiens GN=PRKAG3 PE=1 SV=3	0	0	0	0	0	0	0.06
AAMDC_HUMAN	Mth938 domain-containing protein OS=Homo sapiens GN=AAMDC PE=1 SV=1	2.11	2.11	1.48	0.97	0	0	0.57
AAMP_HUMAN	Angio-associated migratory cell protein OS=Homo sapiens GN=AAMP PE=1 SV=2	0.83	1.1	0.71	0.83	0.14	0.31	0.83
AAPK1_HUMAN	5'-AMP-activated protein kinase catalytic subunit alpha-1 OS=Homo sapiens GN=PRKAA1 PE=1 SV=4	0.56	0.64	0.16	0.28	0.16	0.16	0.28
AAPK2_HUMAN	5'-AMP-activated protein kinase catalytic subunit alpha-2 OS=Homo sapiens GN=PRKAA2 PE=1 SV=2	0.43	0.29	0.11	0.23	0.11	0.05	0.36
AAR2_HUMAN	Protein AAR2 homolog OS=Homo sapiens GN=AAR2 PE=1 SV=2	0.55	0.79	0.55	0	0	0.16	0.08
AASD1_HUMAN	Alanyl-tRNA editing protein Aarsd1 OS=Homo sapiens GN=AARSD1 PE=1 SV=2	2.04	1.15	0.42	0	0.32	0.15	0.63
AASS_HUMAN	Alpha-aminoadipic semialdehyde synthase, mitochondrial OS=Homo sapiens GN=AASS PE=1 SV=1	0.5	0.37	0.25	0.37	0.1	0.03	0.06
AATC_HUMAN	Aspartate aminotransferase, cytoplasmic OS=Homo sapiens GN=GOT1 PE=1 SV=3	4.2	2.95	2.44	0.86	1.28	1.13	3.86
AATF_HUMAN	Protein AATF OS=Homo sapiens GN=AATF PE=1 SV=1	0.93	0.43	0.36	0.75	0	0	0.23
AATM_HUMAN	Aspartate aminotransferase, mitochondrial OS=Homo sapiens GN=GOT2 PE=1 SV=3	3.34	3.34	1.54	1.23	1.23	1.72	4.66
AB17A_HUMAN	Alpha/beta hydrolase domain-containing protein 17A OS=Homo sapiens GN=ABHD17A PE=1 SV=1	0	0	0	0	0	0	0.1
AB17B_HUMAN	Alpha/beta hydrolase domain-containing protein 17B OS=Homo sapiens GN=ABHD17B PE=2 SV=1	0.33	0	0	0.21	0	0	0.21
ABC3B_HUMAN	DNA dC->dU-editing enzyme APOBEC-3B OS=Homo sapiens GN=APOBEC3B PE=1 SV=1	0.31	0	0.15	0.51	0	0	0
ABC3C_HUMAN	DNA dC->dU-editing enzyme APOBEC-3C OS=Homo sapiens GN=APOBEC3C PE=1 SV=2	0.5	0.31	0.5	0.5	0	0	0
ABC3D_HUMAN	DNA dC->dU-editing enzyme APOBEC-3D OS=Homo sapiens GN=APOBEC3D PE=1 SV=1	0	0.22	0	0	0	0	0.14
ABCA1_HUMAN	ATP-binding cassette sub-family A member 1 OS=Homo sapiens GN=ABCA1 PE=1 SV=3	0	0	0	0.03	0	0	0
ABCA3_HUMAN	ATP-binding cassette sub-family A member 3 OS=Homo sapiens GN=ABCA3 PE=1 SV=2	0	0	0	0.05	0	0	0
ABCA5_HUMAN	ATP-binding cassette sub-family A member 5 OS=Homo sapiens GN=ABCA5 PE=2 SV=2	0	0	0	0	0	0	0.02
ABCAA_HUMAN	ATP-binding cassette sub-family A member 10 OS=Homo sapiens GN=ABCA10 PE=2 SV=3	0	0	0	0.04	0	0	0
ABCAD_HUMAN	ATP-binding cassette sub-family A member 13 OS=Homo sapiens GN=ABCA13 PE=2 SV=3	0.02	0.01	0	0.02	0	0	0
ABCB6_HUMAN	ATP-binding cassette sub-family B member 6, mitochondrial OS=Homo sapiens GN=ABCB6 PE=1 SV=1	0.11	0.11	0.03	0	0	0	0
ABCB7_HUMAN	ATP-binding cassette sub-family B member 7, mitochondrial OS=Homo sapiens GN=ABCB7 PE=1 SV=2	0.66	0.42	0.17	1.01	0.17	0.17	0.47
ABCB8_HUMAN	ATP-binding cassette sub-family B member 8, mitochondrial OS=Homo sapiens GN=ABCB8 PE=1 SV=3	0.22	0.17	0.04	0.04	0	0.04	0.08
ABCBA_HUMAN	ATP-binding cassette sub-family B member 10, mitochondrial OS=Homo sapiens GN=ABCB10 PE=1 SV=2	0.69	0.62	0.5	0.5	0.08	0.27	0.33
ABCBB_HUMAN	Bile salt export pump OS=Homo sapiens GN=ABCB11 PE=1 SV=2	0.02	0.02	0.02	0.02	0	0	0
ABCC8_HUMAN	ATP-binding cassette sub-family C member 8 OS=Homo sapiens GN=ABCC8 PE=1 SV=6	0	0	0	0	0.02	0	0
ABCD1_HUMAN	ATP-binding cassette sub-family D member 1 OS=Homo sapiens GN=ABCD1 PE=1 SV=2	0.08	0	0.04	0.04	0	0	0
ABCD3_HUMAN	ATP-binding cassette sub-family D member 3 OS=Homo sapiens GN=ABCD3 PE=1 SV=1	0.89	1.23	0.4	2.87	0.29	0.53	2
ABCD4_HUMAN	ATP-binding cassette sub-family D member 4 OS=Homo sapiens GN=ABCD4 PE=1 SV=1	0	0.05	0	0.1	0	0	0
ABCE1_HUMAN	ATP-binding cassette sub-family E member 1 OS=Homo sapiens GN=ABCE1 PE=1 SV=1	2.24	2.24	1.12	2.91	0.39	0.84	3.09
ABCF1_HUMAN	ATP-binding cassette sub-family F member 1 OS=Homo sapiens GN=ABCF1 PE=1 SV=2	1.55	1.38	0.95	1.38	0.35	0.44	0.95
ABCF2_HUMAN	ATP-binding cassette sub-family F member 2 OS=Homo sapiens GN=ABCF2 PE=1 SV=2	1.8	1.56	1.14	2.34	0.31	0.37	0.71
ABCF3_HUMAN	ATP-binding cassette sub-family F member 3 OS=Homo sapiens GN=ABCF3 PE=1 SV=2	0.55	0.62	0.32	0.83	0.04	0.17	0.43
ABCG2_HUMAN	ATP-binding cassette sub-family G member 2 OS=Homo sapiens GN=ABCG2 PE=1 SV=3	0	0.05	0	0	0	0	0
ABCG8_HUMAN	ATP-binding cassette sub-family G member 8 OS=Homo sapiens GN=ABCG8 PE=1 SV=1	0	0	0	0	0	0	0.04
ABD12_HUMAN	Monoacylglycerol lipase ABHD12 OS=Homo sapiens GN=ABHD12 PE=1 SV=2	0.32	0.42	0.42	0	0	0	0.23
ABHD3_HUMAN	Abhydrolase domain-containing protein 3 OS=Homo sapiens GN=ABHD3 PE=2 SV=2	0.15	0	0	0	0.07	0.15	0.07
ABHD5_HUMAN	1-acylglycerol-3-phosphate O-acyltransferase ABHD5 OS=Homo sapiens GN=ABHD5 PE=1 SV=1	0.27	0.27	0.08	0	0.08	0.08	0.17
ABHD6_HUMAN	Monoacylglycerol lipase ABHD6 OS=Homo sapiens GN=ABHD6 PE=2 SV=1	0.28	0.18	0.09	0.09	0	0	0
ABHD8_HUMAN	Abhydrolase domain-containing protein 8 OS=Homo sapiens GN=ABHD8 PE=2 SV=1	0.07	0.07	0	0	0.07	0	0.07
ABHDA_HUMAN	Mycophenolic acid acyl-glucuronide esterase, mitochondrial OS=Homo sapiens GN=ABHD10 PE=1 SV=1	2.32	1.76	1.76	2.32	0.32	0.32	0.74
ABHDB_HUMAN	Alpha/beta hydrolase domain-containing protein 11 OS=Homo sapiens GN=ABHD11 PE=2 SV=1	0.44	0.1	0.44	0.2	0	0.1	0
ABHEB_HUMAN	Alpha/beta hydrolase domain-containing protein 14B OS=Homo sapiens GN=ABHD14B PE=1 SV=1	1.01	1.31	0.75	2.05	0.52	0.52	1.01
ABHGA_HUMAN	Abhydrolase domain-containing protein 16A OS=Homo sapiens GN=ABHD16A PE=1 SV=3	0.22	0.22	0	0.05	0	0	0.11
ABHGB_HUMAN	Abhydrolase domain-containing protein 16B OS=Homo sapiens GN=ABHD16B PE=2 SV=1	0	0	0	0.06	0	0	0
ABI1_HUMAN	Abl interactor 1 OS=Homo sapiens GN=ABI1 PE=1 SV=4	0.89	0.42	0.12	0.34	0.12	0.12	0.26
ABI2_HUMAN	Abl interactor 2 OS=Homo sapiens GN=ABI2 PE=1 SV=1	0.88	0.58	0.19	0.26	0	0.12	0.33
ABL1_HUMAN	Tyrosine-protein kinase ABL1 OS=Homo sapiens GN=ABL1 PE=1 SV=4	0.11	0	0	0	0	0	0
ABL2_HUMAN	Abelson tyrosine-protein kinase 2 OS=Homo sapiens GN=ABL2 PE=1 SV=1	0.16	0.05	0.08	0.08	0	0.03	0.05
ABLM1_HUMAN	Actin-binding LIM protein 1 OS=Homo sapiens GN=ABLIM1 PE=1 SV=3	0.33	0.24	0.04	0	0	0.04	0.07
ABRAL_HUMAN	Costars family protein ABRACL OS=Homo sapiens GN=ABRACL PE=1 SV=1	1.65	2.66	0.91	8.7	0	0	1.65
ABR_HUMAN	Active breakpoint cluster region-related protein OS=Homo sapiens GN=ABR PE=2 SV=2	0.18	0.1	0.07	0.1	0	0.1	0.03
ABT1_HUMAN	Activator of basal transcription 1 OS=Homo sapiens GN=ABT1 PE=1 SV=1	0.84	0.66	0.36	0.84	0.11	0.11	0.84
ABTB2_HUMAN	Ankyrin repeat and BTB/POZ domain-containing protein 2 OS=Homo sapiens GN=ABTB2 PE=2 SV=2	0.03	0.03	0	0	0	0	0
ACACA_HUMAN	Acetyl-CoA carboxylase 1 OS=Homo sapiens GN=ACACA PE=1 SV=2	1.07	0.79	0.53	0.93	0.23	0.17	0.42
ACAD8_HUMAN	Isobutyryl-CoA dehydrogenase, mitochondrial OS=Homo sapiens GN=ACAD8 PE=1 SV=1	0.63	0.15	0.07	0.42	0	0.07	0.07
ACAD9_HUMAN	Acyl-CoA dehydrogenase family member 9, mitochondrial OS=Homo sapiens GN=ACAD9 PE=1 SV=1	2.18	1.3	0.45	1.52	0.45	0.52	1.9
ACADM_HUMAN	Medium-chain specific acyl-CoA dehydrogenase, mitochondrial OS=Homo sapiens GN=ACADM PE=1 SV=1	1.25	1.58	0.97	0.07	0.72	0.72	1.58
ACADS_HUMAN	Short-chain specific acyl-CoA dehydrogenase, mitochondrial OS=Homo sapiens GN=ACADS PE=1 SV=1	0.53	0.43	0.43	0.24	0.24	0.43	0.24
ACADV_HUMAN	Very long-chain specific acyl-CoA dehydrogenase, mitochondrial OS=Homo sapiens GN=ACADVL PE=1 SV=1	1.97	1.48	1.07	2.25	0.37	0.65	1.26
ACAP1_HUMAN	Arf-GAP with coiled-coil, ANK repeat and PH domain-containing protein 1 OS=Homo sapiens GN=ACAP1 PE=1 SV=1	0	0	0	0.04	0.04	0	0
ACAP2_HUMAN	Arf-GAP with coiled-coil, ANK repeat and PH domain-containing protein 2 OS=Homo sapiens GN=ACAP2 PE=1 SV=3	0.44	0.34	0.04	0.24	0	0.04	0.08
ACAP3_HUMAN	Arf-GAP with coiled-coil, ANK repeat and PH domain-containing protein 3 OS=Homo sapiens GN=ACAP3 PE=1 SV=2	0.07	0	0	0.03	0.03	0	0
ACATN_HUMAN	Acetyl-coenzyme A transporter 1 OS=Homo sapiens GN=SLC33A1 PE=1 SV=1	0.3	0.23	0.17	0.11	0	0.11	0.17
ACBD5_HUMAN	Acyl-CoA-binding domain-containing protein 5 OS=Homo sapiens GN=ACBD5 PE=1 SV=1	0.11	0.05	0.05	0.11	0	0.05	0
ACBD6_HUMAN	Acyl-CoA-binding domain-containing protein 6 OS=Homo sapiens GN=ACBD6 PE=1 SV=1	0.65	0.49	0.35	0.82	0	0.11	0
ACBD7_HUMAN	Acyl-CoA-binding domain-containing protein 7 OS=Homo sapiens GN=ACBD7 PE=1 SV=1	0.83	0.83	0	0	0	0	0
ACBG2_HUMAN	Long-chain-fatty-acid--CoA ligase ACSBG2 OS=Homo sapiens GN=ACSBG2 PE=1 SV=2	0	0	0	0.04	0	0	0
ACBP_HUMAN	Acyl-CoA-binding protein OS=Homo sapiens GN=DBI PE=1 SV=2	2.3	2.3	0.82	13.63	0	0	7.06
ACD10_HUMAN	Acyl-CoA dehydrogenase family member 10 OS=Homo sapiens GN=ACAD10 PE=2 SV=1	0.11	0.11	0	0.11	0	0.06	0.18
ACD11_HUMAN	Acyl-CoA dehydrogenase family member 11 OS=Homo sapiens GN=ACAD11 PE=1 SV=2	0.25	0.2	0.16	0.39	0.08	0.04	0.16
ACDSB_HUMAN	Short/branched chain specific acyl-CoA dehydrogenase, mitochondrial OS=Homo sapiens GN=ACADSB PE=1 SV=1	1.08	1.23	0.59	0.49	0.49	0.59	1.08
ACD_HUMAN	Adrenocortical dysplasia protein homolog OS=Homo sapiens GN=ACD PE=1 SV=3	0.06	0	0	0	0	0	0.06
ACINU_HUMAN	Apoptotic chromatin condensation inducer in the nucleus OS=Homo sapiens GN=ACIN1 PE=1 SV=2	1.1	1.02	0.56	0.53	0.07	0.09	0.16
ACL6A_HUMAN	Actin-like protein 6A OS=Homo sapiens GN=ACTL6A PE=1 SV=1	1.37	0.94	0.82	2.1	0.14	0.39	3.04
ACLY_HUMAN	ATP-citrate synthase OS=Homo sapiens GN=ACLY PE=1 SV=3	3.19	3.78	1.97	5.57	1.4	1.4	3.91
ACN9_HUMAN	Protein ACN9 homolog, mitochondrial OS=Homo sapiens GN=ACN9 PE=2 SV=1	0	0	0	0.23	0	0	0
ACO11_HUMAN	Acyl-coenzyme A thioesterase 11 OS=Homo sapiens GN=ACOT11 PE=1 SV=1	0	0	0	0	0	0	0.05
ACO12_HUMAN	Acyl-coenzyme A thioesterase 12 OS=Homo sapiens GN=ACOT12 PE=1 SV=1	0	0.05	0	0	0	0	0
ACO13_HUMAN	Acyl-coenzyme A thioesterase 13 OS=Homo sapiens GN=ACOT13 PE=1 SV=1	0.84	0.84	0.84	0.5	0	0	0.84
ACOC_HUMAN	Cytoplasmic aconitate hydratase OS=Homo sapiens GN=ACO1 PE=1 SV=3	1.33	0.86	0.43	1.33	0.22	0.18	0.92
ACOD_HUMAN	Acyl-CoA desaturase OS=Homo sapiens GN=SCD PE=1 SV=2	0.17	0.08	0.08	0.17	0	0	0.08
ACON_HUMAN	Aconitate hydratase, mitochondrial OS=Homo sapiens GN=ACO2 PE=1 SV=2	2.7	2.07	1.74	3.29	0.3	0.4	1.27
ACOT1_HUMAN	Acyl-coenzyme A thioesterase 1 OS=Homo sapiens GN=ACOT1 PE=1 SV=1	1.12	0.85	0.73	0.61	0.31	0.41	1.61
ACOT8_HUMAN	Acyl-coenzyme A thioesterase 8 OS=Homo sapiens GN=ACOT8 PE=1 SV=1	0.3	0.19	0	0.42	0.09	0.09	0.19
ACOT9_HUMAN	Acyl-coenzyme A thioesterase 9, mitochondrial OS=Homo sapiens GN=ACOT9 PE=1 SV=2	0.77	0.37	0.14	0.29	0.29	0.21	0.29
ACOX1_HUMAN	Peroxisomal acyl-coenzyme A oxidase 1 OS=Homo sapiens GN=ACOX1 PE=1 SV=3	0.9	0.82	0.24	1.16	0.09	0.14	1.68
ACOX3_HUMAN	Peroxisomal acyl-coenzyme A oxidase 3 OS=Homo sapiens GN=ACOX3 PE=1 SV=2	0.28	0.13	0	0.04	0	0	0
ACPH_HUMAN	Acylamino-acid-releasing enzyme OS=Homo sapiens GN=APEH PE=1 SV=4	0.87	1.02	0.42	0.73	0.12	0.42	0.54
ACPM_HUMAN	Acyl carrier protein, mitochondrial OS=Homo sapiens GN=NDUFAB1 PE=1 SV=3	1.02	1.41	0.7	0	0	0	0.19
ACRC_HUMAN	Acidic repeat-containing protein OS=Homo sapiens GN=ACRC PE=2 SV=1	0	0.04	0	0	0	0	0
ACS2L_HUMAN	Acetyl-coenzyme A synthetase 2-like, mitochondrial OS=Homo sapiens GN=ACSS1 PE=1 SV=2	0.53	0.35	0.24	0.4	0.04	0.29	0.18
ACSA_HUMAN	Acetyl-coenzyme A synthetase, cytoplasmic OS=Homo sapiens GN=ACSS2 PE=1 SV=1	0.22	0	0.08	0.18	0.04	0	0
ACSF2_HUMAN	Acyl-CoA synthetase family member 2, mitochondrial OS=Homo sapiens GN=ACSF2 PE=1 SV=2	0.67	0.32	0.26	0.83	0.15	0.2	0.59
ACSF3_HUMAN	Acyl-CoA synthetase family member 3, mitochondrial OS=Homo sapiens GN=ACSF3 PE=1 SV=3	0.64	0.35	0.16	0.22	0	0.1	0.22
ACSF4_HUMAN	Acyl-CoA synthetase family member 4 OS=Homo sapiens GN=AASDH PE=1 SV=3	0.03	0.08	0	0.03	0	0	0
ACSL1_HUMAN	Long-chain-fatty-acid--CoA ligase 1 OS=Homo sapiens GN=ACSL1 PE=1 SV=1	1	0.23	0.23	0.7	0.13	0.18	0.13
ACSL3_HUMAN	Long-chain-fatty-acid--CoA ligase 3 OS=Homo sapiens GN=ACSL3 PE=1 SV=3	1.12	1.04	0.61	1.48	0.13	0.27	0.67
ACSL4_HUMAN	Long-chain-fatty-acid--CoA ligase 4 OS=Homo sapiens GN=ACSL4 PE=1 SV=2	1.14	1.06	0.49	1.51	0.08	0.22	0.49
ACSL5_HUMAN	Long-chain-fatty-acid--CoA ligase 5 OS=Homo sapiens GN=ACSL5 PE=1 SV=1	0.65	0.34	0.23	0.72	0	0.09	0.23
ACSL6_HUMAN	Long-chain-fatty-acid--CoA ligase 6 OS=Homo sapiens GN=ACSL6 PE=2 SV=4	0.18	0	0	0	0	0	0
ACSM4_HUMAN	Acyl-coenzyme A synthetase ACSM4, mitochondrial OS=Homo sapiens GN=ACSM4 PE=2 SV=1	0	0	0	0.05	0	0	0
ACSM6_HUMAN	Acyl-coenzyme A synthetase ACSM6, mitochondrial OS=Homo sapiens GN=ACSM6 PE=2 SV=3	0	0	0	0.06	0	0	0
ACSS3_HUMAN	Acyl-CoA synthetase short-chain family member 3, mitochondrial OS=Homo sapiens GN=ACSS3 PE=1 SV=1	0.19	0.29	0.09	0.19	0	0.09	0.04
ACTBL_HUMAN	Beta-actin-like protein 2 OS=Homo sapiens GN=ACTBL2 PE=1 SV=2	1.66	1.47	1.87	0.83	1.29	0.69	1.66
ACTB_HUMAN	Actin, cytoplasmic 1 OS=Homo sapiens GN=ACTB PE=1 SV=1	36.72	29.06	22.96	10.25	9.43	5.14	42.88
ACTC_HUMAN	Actin, alpha cardiac muscle 1 OS=Homo sapiens GN=ACTC1 PE=1 SV=1	5.08	5.56	4.64	2.87	3.86	3.5	6.63
ACTG_HUMAN	Actin, cytoplasmic 2 OS=Homo sapiens GN=ACTG1 PE=1 SV=1	42.88	31.43	21.22	12.08	10.25	5.62	50.05
ACTN1_HUMAN	Alpha-actinin-1 OS=Homo sapiens GN=ACTN1 PE=1 SV=2	4.89	3.89	2.47	9	0.92	0.92	5.47
ACTN3_HUMAN	Alpha-actinin-3 OS=Homo sapiens GN=ACTN3 PE=1 SV=2	0	0	0	0.59	0	0	0.59
ACTN4_HUMAN	Alpha-actinin-4 OS=Homo sapiens GN=ACTN4 PE=1 SV=2	7.03	5.68	3.22	13.81	1.92	1.66	8.94
ACTY_HUMAN	Beta-centractin OS=Homo sapiens GN=ACTR1B PE=1 SV=1	0.96	0.96	0.46	0.57	0	0	1.65
ACTZ_HUMAN	Alpha-centractin OS=Homo sapiens GN=ACTR1A PE=1 SV=1	1.44	1.63	0.68	0.95	0.45	0.35	3.12
ACY1_HUMAN	Aminoacylase-1 OS=Homo sapiens GN=ACY1 PE=1 SV=1	1.29	0.62	0.32	0	0.32	0.15	0.62
ACYP1_HUMAN	Acylphosphatase-1 OS=Homo sapiens GN=ACYP1 PE=1 SV=2	4	1.92	2.82	1.24	0	0	1.92
ACYP2_HUMAN	Acylphosphatase-2 OS=Homo sapiens GN=ACYP2 PE=1 SV=2	0.31	0	0	0	0	0	0
ADA10_HUMAN	Disintegrin and metalloproteinase domain-containing protein 10 OS=Homo sapiens GN=ADAM10 PE=1 SV=1	0.16	0.21	0.16	0.16	0.04	0.04	0.12
ADA15_HUMAN	Disintegrin and metalloproteinase domain-containing protein 15 OS=Homo sapiens GN=ADAM15 PE=1 SV=4	0.07	0	0	0	0	0	0
ADA17_HUMAN	Disintegrin and metalloproteinase domain-containing protein 17 OS=Homo sapiens GN=ADAM17 PE=1 SV=1	0.15	0.03	0	0.03	0	0	0
ADA22_HUMAN	Disintegrin and metalloproteinase domain-containing protein 22 OS=Homo sapiens GN=ADAM22 PE=1 SV=1	0	0	0.03	0	0	0	0
ADA30_HUMAN	Disintegrin and metalloproteinase domain-containing protein 30 OS=Homo sapiens GN=ADAM30 PE=2 SV=2	0	0	0	0.04	0	0	0
ADAL_HUMAN	Adenosine deaminase-like protein OS=Homo sapiens GN=ADAL PE=2 SV=2	0.08	0.27	0	0	0	0	0
ADAM9_HUMAN	Disintegrin and metalloproteinase domain-containing protein 9 OS=Homo sapiens GN=ADAM9 PE=1 SV=1	0.15	0.07	0.04	0.04	0	0	0
ADAS_HUMAN	Alkyldihydroxyacetonephosphate synthase, peroxisomal OS=Homo sapiens GN=AGPS PE=1 SV=1	1.1	1.61	0.69	1.5	0.48	0.69	0.84
ADAT2_HUMAN	tRNA-specific adenosine deaminase 2 OS=Homo sapiens GN=ADAT2 PE=1 SV=1	0.16	0.78	0	0	0	0	0
ADAT3_HUMAN	Probable inactive tRNA-specific adenosine deaminase-like protein 3 OS=Homo sapiens GN=ADAT3 PE=1 SV=1	0.18	0.09	0	0.09	0	0.18	0
ADA_HUMAN	Adenosine deaminase OS=Homo sapiens GN=ADA PE=1 SV=3	0.47	0.59	0	0	0	0.08	0
ADCK3_HUMAN	Chaperone activity of bc1 complex-like, mitochondrial OS=Homo sapiens GN=ADCK3 PE=1 SV=1	0.63	0.56	0.49	0.49	0.09	0.14	0.43
ADCK4_HUMAN	Uncharacterized aarF domain-containing protein kinase 4 OS=Homo sapiens GN=ADCK4 PE=1 SV=2	0.3	0.3	0.05	0.23	0.05	0	0.37
ADCY2_HUMAN	Adenylate cyclase type 2 OS=Homo sapiens GN=ADCY2 PE=1 SV=5	0	0	0	0	0.05	0	0
ADCY3_HUMAN	Adenylate cyclase type 3 OS=Homo sapiens GN=ADCY3 PE=1 SV=3	0.03	0.03	0.05	0	0.03	0	0
ADCY4_HUMAN	Adenylate cyclase type 4 OS=Homo sapiens GN=ADCY4 PE=1 SV=1	0	0	0.03	0	0	0	0
ADCY6_HUMAN	Adenylate cyclase type 6 OS=Homo sapiens GN=ADCY6 PE=1 SV=2	0	0.02	0	0	0	0	0
ADCY9_HUMAN	Adenylate cyclase type 9 OS=Homo sapiens GN=ADCY9 PE=1 SV=4	0	0.02	0.02	0	0	0	0
ADCYA_HUMAN	Adenylate cyclase type 10 OS=Homo sapiens GN=ADCY10 PE=1 SV=3	0	0	0	0	0	0	0.03
ADDA_HUMAN	Alpha-adducin OS=Homo sapiens GN=ADD1 PE=1 SV=2	0.88	0.81	0.49	0.67	0.22	0.22	0.49
ADDB_HUMAN	Beta-adducin OS=Homo sapiens GN=ADD2 PE=1 SV=3	0.61	0.55	0.43	0.27	0.08	0	0.08
ADDG_HUMAN	Gamma-adducin OS=Homo sapiens GN=ADD3 PE=1 SV=1	0.69	0.69	0.56	0.44	0.08	0.04	0.38
ADH4_HUMAN	Alcohol dehydrogenase 4 OS=Homo sapiens GN=ADH4 PE=1 SV=5	0.17	0	0	0	0	0	0
ADH6_HUMAN	Alcohol dehydrogenase 6 OS=Homo sapiens GN=ADH6 PE=2 SV=2	0.17	0.27	0	0.17	0	0	0
ADH7_HUMAN	Alcohol dehydrogenase class 4 mu/sigma chain OS=Homo sapiens GN=ADH7 PE=1 SV=2	0	0	0	0.08	0	0	0
ADHX_HUMAN	Alcohol dehydrogenase class-3 OS=Homo sapiens GN=ADH5 PE=1 SV=4	3.11	1.37	1.19	1.56	0.48	0.48	0.73
ADIP_HUMAN	Afadin- and alpha-actinin-binding protein OS=Homo sapiens GN=SSX2IP PE=1 SV=3	0	0.09	0	0	0	0	0
ADK_HUMAN	Adenosine kinase OS=Homo sapiens GN=ADK PE=1 SV=2	1.97	2.2	1.17	0.08	0.08	0.26	1.35
ADNP2_HUMAN	ADNP homeobox protein 2 OS=Homo sapiens GN=ADNP2 PE=1 SV=1	0.14	0.05	0.03	0	0	0	0.03
ADNP_HUMAN	Activity-dependent neuroprotector homeobox protein OS=Homo sapiens GN=ADNP PE=1 SV=1	0.86	0.55	0.29	0.47	0.14	0.05	0.26
ADPGK_HUMAN	ADP-dependent glucokinase OS=Homo sapiens GN=ADPGK PE=1 SV=1	0.8	0.34	0.12	0.34	0	0.06	0.7
ADPPT_HUMAN	L-aminoadipate-semialdehyde dehydrogenase-phosphopantetheinyl transferase OS=Homo sapiens GN=AASDHPPT PE=1 SV=2	1.88	1.64	0.55	3.1	0.42	0.7	1.02
ADR1_HUMAN	Adiponectin receptor protein 1 OS=Homo sapiens GN=ADIPOR1 PE=1 SV=1	0	0.08	0	0	0	0	0
ADRB3_HUMAN	Beta-3 adrenergic receptor OS=Homo sapiens GN=ADRB3 PE=2 SV=3	0	0	0	0.15	0	0	0
ADRM1_HUMAN	Proteasomal ubiquitin receptor ADRM1 OS=Homo sapiens GN=ADRM1 PE=1 SV=2	0.46	0.96	0.46	0.35	0.16	0.25	0.16
ADRO_HUMAN	NADPH:adrenodoxin oxidoreductase, mitochondrial OS=Homo sapiens GN=FDXR PE=1 SV=3	2.88	1.89	1.15	2.65	0.51	0.7	5.98
ADSV_HUMAN	Adseverin OS=Homo sapiens GN=SCIN PE=1 SV=4	0	0	0	0	0	0	0.04
ADT1_HUMAN	ADP/ATP translocase 1 OS=Homo sapiens GN=SLC25A4 PE=1 SV=4	2.44	4.53	3.16	10.83	1.84	1.84	2.44
ADT2_HUMAN	ADP/ATP translocase 2 OS=Homo sapiens GN=SLC25A5 PE=1 SV=7	5.77	7.2	5.77	18.39	3.62	3.62	5.15
ADT3_HUMAN	ADP/ATP translocase 3 OS=Homo sapiens GN=SLC25A6 PE=1 SV=4	3.2	5.15	3.2	15.01	2.81	2.47	4.59
ADT4_HUMAN	ADP/ATP translocase 4 OS=Homo sapiens GN=SLC25A31 PE=2 SV=1	0	0	0	0.87	0.43	0	0
ADXL_HUMAN	Adrenodoxin-like protein, mitochondrial OS=Homo sapiens GN=FDX1L PE=1 SV=1	0.17	0.88	0	0.17	0.17	0.17	0
ADX_HUMAN	Adrenodoxin, mitochondrial OS=Homo sapiens GN=FDX1 PE=1 SV=1	0.37	0.37	0.37	0.37	0	0	0.37
AEBP2_HUMAN	Zinc finger protein AEBP2 OS=Homo sapiens GN=AEBP2 PE=1 SV=2	0.06	0.06	0.06	0.06	0.06	0	0.06
AEDO_HUMAN	2-aminoethanethiol dioxygenase OS=Homo sapiens GN=ADO PE=1 SV=2	0.88	0.52	0.11	0.23	0.23	0.11	0
AES_HUMAN	Amino-terminal enhancer of split OS=Homo sapiens GN=AES PE=1 SV=4	0.53	0.15	0.15	0.33	0	0	0
AF10_HUMAN	Protein AF-10 OS=Homo sapiens GN=MLLT10 PE=1 SV=2	0.06	0.06	0	0	0	0	0
AF17_HUMAN	Protein AF-17 OS=Homo sapiens GN=MLLT6 PE=1 SV=2	0.03	0	0	0	0	0	0
AF1L1_HUMAN	Actin filament-associated protein 1-like 1 OS=Homo sapiens GN=AFAP1L1 PE=1 SV=2	0	0	0	0.08	0	0	0
AF1Q_HUMAN	Protein AF1q OS=Homo sapiens GN=MLLT11 PE=1 SV=1	2.26	1.42	0.8	0.34	0	0	0
AF9_HUMAN	Protein AF-9 OS=Homo sapiens GN=MLLT3 PE=1 SV=2	0.16	0.11	0.11	0	0	0	0
AFAD_HUMAN	Afadin OS=Homo sapiens GN=MLLT4 PE=1 SV=3	0.89	0.67	0.41	0.48	0.15	0.15	0.21
AFAP1_HUMAN	Actin filament-associated protein 1 OS=Homo sapiens GN=AFAP1 PE=1 SV=2	0.04	0	0	0	0	0	0
AFF1_HUMAN	AF4/FMR2 family member 1 OS=Homo sapiens GN=AFF1 PE=1 SV=1	0.05	0.02	0	0	0	0	0
AFF4_HUMAN	AF4/FMR2 family member 4 OS=Homo sapiens GN=AFF4 PE=1 SV=1	0.26	0.13	0.03	0	0	0	0.03
AFG32_HUMAN	AFG3-like protein 2 OS=Homo sapiens GN=AFG3L2 PE=1 SV=2	0.85	0.99	0.2	0.72	0.16	0.29	0.38
AFTIN_HUMAN	Aftiphilin OS=Homo sapiens GN=AFTPH PE=1 SV=2	0.13	0.46	0	0.03	0	0	0.03
AG10A_HUMAN	Dol-P-Glc:Glc(2)Man(9)GlcNAc(2)-PP-Dol alpha-1,2-glucosyltransferase OS=Homo sapiens GN=ALG10 PE=2 SV=1	0.12	0	0	0.12	0	0	0
AG10B_HUMAN	Putative Dol-P-Glc:Glc(2)Man(9)GlcNAc(2)-PP-Dol alpha-1,2-glucosyltransferase OS=Homo sapiens GN=ALG10B PE=1 SV=2	0	0.12	0	0	0	0	0
AGAL_HUMAN	Alpha-galactosidase A OS=Homo sapiens GN=GLA PE=1 SV=1	0.91	1.31	0.57	0.67	0.21	0.38	1.31
AGAP2_HUMAN	Arf-GAP with GTPase, ANK repeat and PH domain-containing protein 2 OS=Homo sapiens GN=AGAP2 PE=1 SV=2	0	0	0	0.05	0.05	0	0
AGAP3_HUMAN	Arf-GAP with GTPase, ANK repeat and PH domain-containing protein 3 OS=Homo sapiens GN=AGAP3 PE=1 SV=2	0.22	0.18	0.07	0.14	0	0.07	0.07
AGFG1_HUMAN	Arf-GAP domain and FG repeat-containing protein 1 OS=Homo sapiens GN=AGFG1 PE=1 SV=2	0.39	0.55	0.18	0.31	0.18	0.24	0.64
AGFG2_HUMAN	Arf-GAP domain and FG repeat-containing protein 2 OS=Homo sapiens GN=AGFG2 PE=1 SV=2	0	0.07	0	0	0	0	0.14
AGGF1_HUMAN	Angiogenic factor with G patch and FHA domains 1 OS=Homo sapiens GN=AGGF1 PE=1 SV=2	0.04	0.13	0	0.04	0	0	0
AGK_HUMAN	Acylglycerol kinase, mitochondrial OS=Homo sapiens GN=AGK PE=1 SV=2	2.34	1.92	0.71	1.23	0.4	0.71	3.67
AGM1_HUMAN	Phosphoacetylglucosamine mutase OS=Homo sapiens GN=PGM3 PE=1 SV=1	1.1	0.7	0.24	1.47	0.24	0.3	0.7
AGO1_HUMAN	Protein argonaute-1 OS=Homo sapiens GN=AGO1 PE=1 SV=3	0.18	0.22	0.14	0.3	0.03	0.07	0.14
AGO2_HUMAN	Protein argonaute-2 OS=Homo sapiens GN=AGO2 PE=1 SV=3	0.48	0.43	0.22	0.43	0	0.07	0.07
AGRIN_HUMAN	Agrin OS=Homo sapiens GN=AGRN PE=1 SV=5	0.03	0.04	0	0	0	0	0
AHDC1_HUMAN	AT-hook DNA-binding motif-containing protein 1 OS=Homo sapiens GN=AHDC1 PE=1 SV=1	0.02	0.02	0	0	0	0	0
AHNK2_HUMAN	Protein AHNAK2 OS=Homo sapiens GN=AHNAK2 PE=1 SV=2	0.01	0.01	0.01	0.02	0	0	0
AHNK_HUMAN	Neuroblast differentiation-associated protein AHNAK OS=Homo sapiens GN=AHNAK PE=1 SV=2	0.74	0.95	0.38	0.36	0.01	0.03	0.12
AHSA1_HUMAN	Activator of 90 kDa heat shock protein ATPase homolog 1 OS=Homo sapiens GN=AHSA1 PE=1 SV=1	2.46	3.43	1.29	3.43	0.78	0.39	1.48
AICDA_HUMAN	Single-stranded DNA cytosine deaminase OS=Homo sapiens GN=AICDA PE=1 SV=1	0	0	0	0.14	0	0	0
AIDA_HUMAN	Axin interactor, dorsalization-associated protein OS=Homo sapiens GN=AIDA PE=1 SV=1	0.88	0.2	0.2	0.57	0.09	0.09	0.09
AIF1L_HUMAN	Allograft inflammatory factor 1-like OS=Homo sapiens GN=AIF1L PE=1 SV=1	0.43	0.43	0.2	0	0	0	0.2
AIFM1_HUMAN	Apoptosis-inducing factor 1, mitochondrial OS=Homo sapiens GN=AIFM1 PE=1 SV=1	1.86	1.36	1.05	3.61	0.77	1.05	2.63
AIFM2_HUMAN	Apoptosis-inducing factor 2 OS=Homo sapiens GN=AIFM2 PE=1 SV=1	0.48	0.37	0.17	0	0	0.17	0.17
AIG1_HUMAN	Androgen-induced gene 1 protein OS=Homo sapiens GN=AIG1 PE=1 SV=2	0.25	0.12	0	0	0	0	0
AIM2_HUMAN	Interferon-inducible protein AIM2 OS=Homo sapiens GN=AIM2 PE=1 SV=1	0	0	0	0.08	0	0	0
AIMP1_HUMAN	Aminoacyl tRNA synthase complex-interacting multifunctional protein 1 OS=Homo sapiens GN=AIMP1 PE=1 SV=2	4.68	3.73	1.08	6.48	1.08	0.9	1.73
AIMP2_HUMAN	Aminoacyl tRNA synthase complex-interacting multifunctional protein 2 OS=Homo sapiens GN=AIMP2 PE=1 SV=2	0.86	1.04	0.43	1.66	0.09	0.19	0.71
AINX_HUMAN	Alpha-internexin OS=Homo sapiens GN=INA PE=1 SV=2	0.68	2.17	0.59	0.78	0.26	0.5	1
AIP_HUMAN	AH receptor-interacting protein OS=Homo sapiens GN=AIP PE=1 SV=2	1.72	2.49	0.65	2.49	0.4	0.65	0.28
AJUBA_HUMAN	LIM domain-containing protein ajuba OS=Homo sapiens GN=AJUBA PE=1 SV=1	0.06	0.06	0	0.06	0	0	0
AK17A_HUMAN	A-kinase anchor protein 17A OS=Homo sapiens GN=AKAP17A PE=1 SV=2	0.32	0.17	0.13	0.08	0.13	0	0.08
AK1A1_HUMAN	Alcohol dehydrogenase [NADP(+)] OS=Homo sapiens GN=AKR1A1 PE=1 SV=3	4.59	3.32	2.06	4.13	1.17	0.99	1.81
AK1BA_HUMAN	Aldo-keto reductase family 1 member B10 OS=Homo sapiens GN=AKR1B10 PE=1 SV=2	2.12	1.4	0.85	2.12	0.55	0.55	1.02
AK1C1_HUMAN	Aldo-keto reductase family 1 member C1 OS=Homo sapiens GN=AKR1C1 PE=1 SV=1	0	0	0	17.19	1.78	1.56	0
AK1C2_HUMAN	Aldo-keto reductase family 1 member C2 OS=Homo sapiens GN=AKR1C2 PE=1 SV=3	3.28	4.08	1.16	13.19	1.35	0.82	2.61
AK1C3_HUMAN	Aldo-keto reductase family 1 member C3 OS=Homo sapiens GN=AKR1C3 PE=1 SV=4	4.06	2.92	1.78	6.75	0	0	1.78
AK1D1_HUMAN	3-oxo-5-beta-steroid 4-dehydrogenase OS=Homo sapiens GN=AKR1D1 PE=1 SV=1	0	0	0	0.18	0	0	0
AKA10_HUMAN	A-kinase anchor protein 10, mitochondrial OS=Homo sapiens GN=AKAP10 PE=1 SV=2	0.19	0.09	0.09	0.14	0	0.04	0.04
AKA11_HUMAN	A-kinase anchor protein 11 OS=Homo sapiens GN=AKAP11 PE=1 SV=1	0.05	0	0	0.02	0	0	0
AKA12_HUMAN	A-kinase anchor protein 12 OS=Homo sapiens GN=AKAP12 PE=1 SV=4	1.7	1.99	0.96	1	0.07	0.03	0.42
AKAP1_HUMAN	A-kinase anchor protein 1, mitochondrial OS=Homo sapiens GN=AKAP1 PE=1 SV=1	0.75	0.75	0.43	0.64	0.18	0.07	0.3
AKAP2_HUMAN	A-kinase anchor protein 2 OS=Homo sapiens GN=AKAP2 PE=1 SV=3	0.18	0.45	0.03	0	0	0	0
AKAP5_HUMAN	A-kinase anchor protein 5 OS=Homo sapiens GN=AKAP5 PE=1 SV=3	0.14	0.22	0	0	0	0	0
AKAP8_HUMAN	A-kinase anchor protein 8 OS=Homo sapiens GN=AKAP8 PE=1 SV=1	0.46	0.65	0.18	0.23	0	0	0.09
AKAP9_HUMAN	A-kinase anchor protein 9 OS=Homo sapiens GN=AKAP9 PE=1 SV=3	0.32	0.29	0.07	0.14	0.01	0.01	0.01
AKD1_HUMAN	Adenylate kinase domain-containing protein 1 OS=Homo sapiens GN=AKD1 PE=2 SV=2	0.01	0	0	0	0	0	0
AKIB1_HUMAN	Ankyrin repeat and IBR domain-containing protein 1 OS=Homo sapiens GN=ANKIB1 PE=1 SV=3	0	0	0.03	0	0	0	0
AKIP_HUMAN	Aurora kinase A-interacting protein OS=Homo sapiens GN=AURKAIP1 PE=1 SV=1	0	0	0	0	0	0	0.15
AKIR2_HUMAN	Akirin-2 OS=Homo sapiens GN=AKIRIN2 PE=1 SV=2	0.15	0.15	0	0	0	0	0
AKP13_HUMAN	A-kinase anchor protein 13 OS=Homo sapiens GN=AKAP13 PE=1 SV=2	0.17	0.08	0.02	0.05	0	0	0.02
AKP8L_HUMAN	A-kinase anchor protein 8-like OS=Homo sapiens GN=AKAP8L PE=1 SV=3	0.43	0.43	0.09	0.25	0	0.05	0.09
AKT1_HUMAN	RAC-alpha serine/threonine-protein kinase OS=Homo sapiens GN=AKT1 PE=1 SV=2	0.98	0.58	0	0.19	0	0	0.41
AKT2_HUMAN	RAC-beta serine/threonine-protein kinase OS=Homo sapiens GN=AKT2 PE=1 SV=2	0.41	0.33	0.12	0	0	0	0.19
AKT3_HUMAN	RAC-gamma serine/threonine-protein kinase OS=Homo sapiens GN=AKT3 PE=1 SV=1	0.41	0.67	0	0.19	0	0	0.33
AKTIP_HUMAN	AKT-interacting protein OS=Homo sapiens GN=AKTIP PE=1 SV=1	0.61	0.21	0	0.1	0	0	0.1
AKTS1_HUMAN	Proline-rich AKT1 substrate 1 OS=Homo sapiens GN=AKT1S1 PE=1 SV=1	0.77	0.58	0.58	0	0	0	0.41
AL14E_HUMAN	ARL14 effector protein OS=Homo sapiens GN=ARL14EP PE=1 SV=1	0	0.23	0	0.11	0	0.11	0
AL1A1_HUMAN	Retinal dehydrogenase 1 OS=Homo sapiens GN=ALDH1A1 PE=1 SV=2	3.22	3.47	1.37	2.55	0.41	0.78	3.74
AL1A2_HUMAN	Retinal dehydrogenase 2 OS=Homo sapiens GN=ALDH1A2 PE=1 SV=3	1.19	0.65	0.56	0.56	0.18	0.18	0.75
AL1A3_HUMAN	Aldehyde dehydrogenase family 1 member A3 OS=Homo sapiens GN=ALDH1A3 PE=1 SV=2	0.33	0	0	0	0	0	0
AL1B1_HUMAN	Aldehyde dehydrogenase X, mitochondrial OS=Homo sapiens GN=ALDH1B1 PE=1 SV=3	1.87	1.87	1.06	2.59	0.84	1.3	3.48
AL1L1_HUMAN	Cytosolic 10-formyltetrahydrofolate dehydrogenase OS=Homo sapiens GN=ALDH1L1 PE=1 SV=2	0.14	0.14	0.07	0.1	0	0	0.07
AL1L2_HUMAN	Mitochondrial 10-formyltetrahydrofolate dehydrogenase OS=Homo sapiens GN=ALDH1L2 PE=1 SV=2	0.94	0.88	0.21	0.71	0.06	0.1	0.37
AL2CL_HUMAN	ALS2 C-terminal-like protein OS=Homo sapiens GN=ALS2CL PE=1 SV=1	0	0	0	0.03	0	0	0
AL3A2_HUMAN	Fatty aldehyde dehydrogenase OS=Homo sapiens GN=ALDH3A2 PE=1 SV=1	1.25	1.12	1.12	1.52	0.59	0.59	1.83
AL3B1_HUMAN	Aldehyde dehydrogenase family 3 member B1 OS=Homo sapiens GN=ALDH3B1 PE=2 SV=1	0	0.2	0	0	0	0	0
AL4A1_HUMAN	Delta-1-pyrroline-5-carboxylate dehydrogenase, mitochondrial OS=Homo sapiens GN=ALDH4A1 PE=1 SV=3	1.28	0.59	0.23	0.76	0.17	0.29	0.43
AL7A1_HUMAN	Alpha-aminoadipic semialdehyde dehydrogenase OS=Homo sapiens GN=ALDH7A1 PE=1 SV=5	3.32	1.96	1.26	1.96	0.82	1.51	3.09
AL8A1_HUMAN	Aldehyde dehydrogenase family 8 member A1 OS=Homo sapiens GN=ALDH8A1 PE=1 SV=1	0.06	0	0	0	0	0	0
AL9A1_HUMAN	4-trimethylaminobutyraldehyde dehydrogenase OS=Homo sapiens GN=ALDH9A1 PE=1 SV=3	2.03	1.86	1.14	2.03	1.14	1.27	3.84
ALAT2_HUMAN	Alanine aminotransferase 2 OS=Homo sapiens GN=GPT2 PE=1 SV=1	0.92	0.63	0.46	0.72	0.06	0.24	0.92
ALBU_HUMAN	Serum albumin OS=Homo sapiens GN=ALB PE=1 SV=2	0.97	1.95	0.37	0.97	0.31	0.31	0.64
ALDH2_HUMAN	Aldehyde dehydrogenase, mitochondrial OS=Homo sapiens GN=ALDH2 PE=1 SV=2	3.32	3.84	2.86	3.57	1.08	1.6	4.41
ALDOA_HUMAN	Fructose-bisphosphate aldolase A OS=Homo sapiens GN=ALDOA PE=1 SV=2	16.65	16.65	5.26	52.92	3.55	3.2	10.85
ALDOB_HUMAN	Fructose-bisphosphate aldolase B OS=Homo sapiens GN=ALDOB PE=1 SV=2	0	0.17	0	0	0	0	0
ALDOC_HUMAN	Fructose-bisphosphate aldolase C OS=Homo sapiens GN=ALDOC PE=1 SV=2	4.34	2.88	1.6	4.34	0.89	1.22	1.4
ALDR_HUMAN	Aldose reductase OS=Homo sapiens GN=AKR1B1 PE=1 SV=3	3.44	3.84	1.02	3.06	0.69	1.02	1.86
ALG11_HUMAN	GDP-Man:Man(3)GlcNAc(2)-PP-Dol alpha-1,2-mannosyltransferase OS=Homo sapiens GN=ALG11 PE=1 SV=2	0.19	0.12	0	0.19	0.06	0.12	0.19
ALG12_HUMAN	Dol-P-Man:Man(7)GlcNAc(2)-PP-Dol alpha-1,6-mannosyltransferase OS=Homo sapiens GN=ALG12 PE=1 SV=1	0.06	0.06	0	0	0	0	0
ALG13_HUMAN	UDP-N-acetylglucosamine transferase subunit ALG13 homolog OS=Homo sapiens GN=ALG13 PE=1 SV=2	0.22	0.22	0.05	0.05	0	0	0
ALG14_HUMAN	UDP-N-acetylglucosamine transferase subunit ALG14 homolog OS=Homo sapiens GN=ALG14 PE=2 SV=1	0.14	0.14	0	0.29	0	0.14	0.14
ALG1_HUMAN	Chitobiosyldiphosphodolichol beta-mannosyltransferase OS=Homo sapiens GN=ALG1 PE=1 SV=2	0.43	0.62	0.06	0.27	0	0	0.43
ALG2_HUMAN	Alpha-1,3/1,6-mannosyltransferase ALG2 OS=Homo sapiens GN=ALG2 PE=1 SV=1	0.22	0.14	0.14	0.07	0	0	0.49
ALG3_HUMAN	Dol-P-Man:Man(5)GlcNAc(2)-PP-Dol alpha-1,3-mannosyltransferase OS=Homo sapiens GN=ALG3 PE=1 SV=1	0.06	0.06	0	0.13	0	0	0
ALG5_HUMAN	Dolichyl-phosphate beta-glucosyltransferase OS=Homo sapiens GN=ALG5 PE=1 SV=1	0.82	0.67	0.41	0.98	0.29	0.09	0.19
ALG6_HUMAN	Dolichyl pyrophosphate Man9GlcNAc2 alpha-1,3-glucosyltransferase OS=Homo sapiens GN=ALG6 PE=1 SV=1	0.31	0.38	0.06	0.18	0	0.06	0.11
ALG8_HUMAN	Probable dolichyl pyrophosphate Glc1Man9GlcNAc2 alpha-1,3-glucosyltransferase OS=Homo sapiens GN=ALG8 PE=1 SV=2	0.23	0.11	0.05	0.05	0.05	0	0
ALG9_HUMAN	Alpha-1,2-mannosyltransferase ALG9 OS=Homo sapiens GN=ALG9 PE=1 SV=2	0.1	0	0.05	0	0	0	0.05
ALKB1_HUMAN	Alkylated DNA repair protein alkB homolog 1 OS=Homo sapiens GN=ALKBH1 PE=1 SV=2	0.43	0.24	0.07	0.07	0.07	0.16	0
ALKB2_HUMAN	Alpha-ketoglutarate-dependent dioxygenase alkB homolog 2 OS=Homo sapiens GN=ALKBH2 PE=1 SV=1	0.24	0.53	0.38	0.53	0	0	0.24
ALKB3_HUMAN	Alpha-ketoglutarate-dependent dioxygenase alkB homolog 3 OS=Homo sapiens GN=ALKBH3 PE=1 SV=1	0.21	0.6	0.1	0.33	0	0.1	0.21
ALKB4_HUMAN	Alpha-ketoglutarate-dependent dioxygenase alkB homolog 4 OS=Homo sapiens GN=ALKBH4 PE=1 SV=1	0.73	0.44	0.1	0.32	0.32	0.58	0.1
ALKB5_HUMAN	RNA demethylase ALKBH5 OS=Homo sapiens GN=ALKBH5 PE=1 SV=2	1.36	1.04	0.53	0.33	0.33	0.65	1.04
ALKB6_HUMAN	Alpha-ketoglutarate-dependent dioxygenase alkB homolog 6 OS=Homo sapiens GN=ALKBH6 PE=1 SV=2	0.27	0.43	0.27	0.27	0	0	0.13
ALKB7_HUMAN	Alpha-ketoglutarate-dependent dioxygenase alkB homolog 7 OS=Homo sapiens GN=ALKBH7 PE=2 SV=1	0	0.29	0	0.29	0	0.14	0.14
ALKB8_HUMAN	Alkylated DNA repair protein alkB homolog 8 OS=Homo sapiens GN=ALKBH8 PE=1 SV=2	0	0.04	0.04	0.04	0	0	0
ALK_HUMAN	ALK tyrosine kinase receptor OS=Homo sapiens GN=ALK PE=1 SV=3	0.02	0	0	0	0	0	0
ALMS1_HUMAN	Alstrom syndrome protein 1 OS=Homo sapiens GN=ALMS1 PE=1 SV=3	0.01	0.03	0	0	0	0	0
ALR_HUMAN	FAD-linked sulfhydryl oxidase ALR OS=Homo sapiens GN=GFER PE=1 SV=2	0.14	1.19	0.3	0.69	0	0	0
ALS2_HUMAN	Alsin OS=Homo sapiens GN=ALS2 PE=1 SV=2	0.02	0	0	0.02	0	0.02	0
ALX4_HUMAN	Homeobox protein aristaless-like 4 OS=Homo sapiens GN=ALX4 PE=1 SV=2	0.07	0.15	0	0	0	0	0
AMACR_HUMAN	Alpha-methylacyl-CoA racemase OS=Homo sapiens GN=AMACR PE=1 SV=2	0.08	0	0.08	0	0	0	0
AMBP_HUMAN	Protein AMBP OS=Homo sapiens GN=AMBP PE=1 SV=1	0.08	0.17	0	0	0	0.08	0
AMER1_HUMAN	APC membrane recruitment protein 1 OS=Homo sapiens GN=AMER1 PE=1 SV=2	0.03	0	0	0	0	0	0
AMERL_HUMAN	AMMECR1-like protein OS=Homo sapiens GN=AMMECR1L PE=1 SV=1	0.44	0.31	0.09	0.31	0	0.09	0.09
AMFR_HUMAN	E3 ubiquitin-protein ligase AMFR OS=Homo sapiens GN=AMFR PE=1 SV=2	0.09	0.09	0	0.09	0	0	0.04
AMMR1_HUMAN	AMME syndrome candidate gene 1 protein OS=Homo sapiens GN=AMMECR1 PE=2 SV=1	0.42	0	0.09	0.3	0	0	0
AMN1_HUMAN	Protein AMN1 homolog OS=Homo sapiens GN=AMN1 PE=2 SV=4	0.24	0	0	0.11	0	0	0
AMOL1_HUMAN	Angiomotin-like protein 1 OS=Homo sapiens GN=AMOTL1 PE=1 SV=1	0.2	0.35	0.16	0	0	0	0.16
AMOL2_HUMAN	Angiomotin-like protein 2 OS=Homo sapiens GN=AMOTL2 PE=1 SV=3	0	0.08	0.08	0	0	0	0
AMOT_HUMAN	Angiomotin OS=Homo sapiens GN=AMOT PE=1 SV=1	2.14	2.05	0.92	3.12	0.63	0.55	1.46
AMPB_HUMAN	Aminopeptidase B OS=Homo sapiens GN=RNPEP PE=1 SV=2	2.72	2.13	0.62	3.07	0.85	1.2	1.86
AMPD2_HUMAN	AMP deaminase 2 OS=Homo sapiens GN=AMPD2 PE=1 SV=2	1.01	0.46	0.56	0.66	0.14	0.1	0.33
AMPH_HUMAN	Amphiphysin OS=Homo sapiens GN=AMPH PE=1 SV=1	0.23	0.46	0.09	0.09	0	0	0.04
AMPL_HUMAN	Cytosol aminopeptidase OS=Homo sapiens GN=LAP3 PE=1 SV=3	3.61	3.61	1.47	3.88	1.21	0.97	10.41
AMPN_HUMAN	Aminopeptidase N OS=Homo sapiens GN=ANPEP PE=1 SV=4	0.16	0.09	0.09	0.16	0	0.03	0.06
AMPO_HUMAN	Aminopeptidase O OS=Homo sapiens GN=AOPEP PE=1 SV=2	0	0.03	0	0.07	0	0	0
AMRA1_HUMAN	Activating molecule in BECN1-regulated autophagy protein 1 OS=Homo sapiens GN=AMBRA1 PE=1 SV=2	0.07	0.02	0	0.02	0	0	0
AMRP_HUMAN	Alpha-2-macroglobulin receptor-associated protein OS=Homo sapiens GN=LRPAP1 PE=1 SV=1	1	1.71	0.36	0.71	0.08	0	0.08
AMYP_HUMAN	Pancreatic alpha-amylase OS=Homo sapiens GN=AMY2A PE=1 SV=2	0	0	0	0.06	0.06	0.18	0
AMZ2_HUMAN	Archaemetzincin-2 OS=Homo sapiens GN=AMZ2 PE=1 SV=2	0.26	0.36	0.16	0.16	0	0.08	0
AN13A_HUMAN	Ankyrin repeat domain-containing protein 13A OS=Homo sapiens GN=ANKRD13A PE=1 SV=3	0.21	0.1	0	0.15	0	0.05	0
AN13C_HUMAN	Ankyrin repeat domain-containing protein 13C OS=Homo sapiens GN=ANKRD13C PE=2 SV=2	0.05	0.05	0	0	0	0	0
AN13D_HUMAN	Ankyrin repeat domain-containing protein 13D OS=Homo sapiens GN=ANKRD13D PE=1 SV=2	0	0	0	0.06	0	0	0
AN18A_HUMAN	Ankyrin repeat domain-containing protein 18A OS=Homo sapiens GN=ANKRD18A PE=2 SV=3	0	0	0	0.09	0	0	0
AN18B_HUMAN	Ankyrin repeat domain-containing protein 18B OS=Homo sapiens GN=ANKRD18B PE=1 SV=1	0.06	0	0	0	0	0	0
AN30A_HUMAN	Ankyrin repeat domain-containing protein 30A OS=Homo sapiens GN=ANKRD30A PE=1 SV=3	0	0	0	0	0.04	0	0
AN30B_HUMAN	Ankyrin repeat domain-containing protein 30B OS=Homo sapiens GN=ANKRD30B PE=2 SV=3	0	0	0	0.08	0	0	0.04
AN32A_HUMAN	Acidic leucine-rich nuclear phosphoprotein 32 family member A OS=Homo sapiens GN=ANP32A PE=1 SV=1	2.35	3.18	2.35	5.49	2	1.41	3.66
AN32B_HUMAN	Acidic leucine-rich nuclear phosphoprotein 32 family member B OS=Homo sapiens GN=ANP32B PE=1 SV=1	1.97	2.31	1.97	3.11	1.97	1.14	3.11
AN32E_HUMAN	Acidic leucine-rich nuclear phosphoprotein 32 family member E OS=Homo sapiens GN=ANP32E PE=1 SV=1	2.78	2.41	1.27	2.41	0.85	0.51	3.19
AN34C_HUMAN	Ankyrin repeat domain-containing protein 34C OS=Homo sapiens GN=ANKRD34C PE=2 SV=2	0.06	0.06	0	0.06	0	0.06	0
AN36A_HUMAN	Ankyrin repeat domain-containing protein 36A OS=Homo sapiens GN=ANKRD36 PE=2 SV=3	0	0	0	0.05	0	0	0
ANAG_HUMAN	Alpha-N-acetylglucosaminidase OS=Homo sapiens GN=NAGLU PE=1 SV=2	0.66	0.42	0.08	0.53	0	0	0.21
ANC2_HUMAN	Anaphase-promoting complex subunit 2 OS=Homo sapiens GN=ANAPC2 PE=1 SV=1	0.45	0.45	0.19	0.23	0.07	0.03	0.11
ANFY1_HUMAN	Ankyrin repeat and FYVE domain-containing protein 1 OS=Homo sapiens GN=ANKFY1 PE=1 SV=2	0.91	1.01	0.16	0.6	0.13	0.08	0.25
ANGE1_HUMAN	Protein angel homolog 1 OS=Homo sapiens GN=ANGEL1 PE=2 SV=1	0.04	0	0	0	0	0	0
ANGE2_HUMAN	Protein angel homolog 2 OS=Homo sapiens GN=ANGEL2 PE=2 SV=1	0.42	0.05	0.05	0.16	0	0.05	0.16
ANGL7_HUMAN	Angiopoietin-related protein 7 OS=Homo sapiens GN=ANGPTL7 PE=1 SV=1	0	0	0.08	0	0	0	0
ANGP4_HUMAN	Angiopoietin-4 OS=Homo sapiens GN=ANGPT4 PE=1 SV=1	0	0	0	0.06	0	0	0
ANGT_HUMAN	Angiotensinogen OS=Homo sapiens GN=AGT PE=1 SV=1	0.06	0.06	0	0	0	0	0
ANK1_HUMAN	Ankyrin-1 OS=Homo sapiens GN=ANK1 PE=1 SV=3	0.05	0.02	0	0	0.02	0	0
ANK2_HUMAN	Ankyrin-2 OS=Homo sapiens GN=ANK2 PE=1 SV=4	0.07	0.03	0.02	0.06	0	0	0.02
ANK3_HUMAN	Ankyrin-3 OS=Homo sapiens GN=ANK3 PE=1 SV=3	0.13	0.09	0.03	0.08	0.01	0.02	0.06
ANKF1_HUMAN	Ankyrin repeat and fibronectin type-III domain-containing protein 1 OS=Homo sapiens GN=ANKFN1 PE=2 SV=2	0	0.04	0	0	0	0	0
ANKH1_HUMAN	Ankyrin repeat and KH domain-containing protein 1 OS=Homo sapiens GN=ANKHD1 PE=1 SV=1	0.45	0.4	0.25	0.32	0.06	0.07	0.17
ANKL2_HUMAN	Ankyrin repeat and LEM domain-containing protein 2 OS=Homo sapiens GN=ANKLE2 PE=1 SV=4	0.79	0.85	0.2	0.13	0.03	0.03	0.06
ANKR6_HUMAN	Ankyrin repeat domain-containing protein 6 OS=Homo sapiens GN=ANKRD6 PE=1 SV=3	0	0	0	0.04	0	0	0
ANKS6_HUMAN	Ankyrin repeat and SAM domain-containing protein 6 OS=Homo sapiens GN=ANKS6 PE=1 SV=2	0.04	0	0	0.04	0	0	0
ANKY2_HUMAN	Ankyrin repeat and MYND domain-containing protein 2 OS=Homo sapiens GN=ANKMY2 PE=1 SV=1	0.46	0.56	0.14	0.21	0.07	0.14	0.56
ANKZ1_HUMAN	Ankyrin repeat and zinc finger domain-containing protein 1 OS=Homo sapiens GN=ANKZF1 PE=1 SV=1	0.32	0.17	0.08	0.13	0	0	0.04
ANLN_HUMAN	Actin-binding protein anillin OS=Homo sapiens GN=ANLN PE=1 SV=2	0.36	0.14	0.11	0.17	0	0.03	0.08
ANM10_HUMAN	Putative protein arginine N-methyltransferase 10 OS=Homo sapiens GN=PRMT10 PE=2 SV=1	0.22	0.11	0.03	0.07	0	0	0.11
ANM1_HUMAN	Protein arginine N-methyltransferase 1 OS=Homo sapiens GN=PRMT1 PE=1 SV=2	2.9	5.14	1.48	3.54	1.67	2.35	2.35
ANM3_HUMAN	Protein arginine N-methyltransferase 3 OS=Homo sapiens GN=PRMT3 PE=1 SV=3	1.46	1.21	0.61	1.21	0.37	0.24	0.7
ANM5_HUMAN	Protein arginine N-methyltransferase 5 OS=Homo sapiens GN=PRMT5 PE=1 SV=4	1.4	1.74	0.93	3.43	0.42	0.69	3.43
ANM6_HUMAN	Protein arginine N-methyltransferase 6 OS=Homo sapiens GN=PRMT6 PE=1 SV=1	0.35	0.25	0.25	0	0.08	0.08	0.08
ANM7_HUMAN	Protein arginine N-methyltransferase 7 OS=Homo sapiens GN=PRMT7 PE=1 SV=1	0.13	0.08	0.04	0.08	0	0.04	0.04
ANM8_HUMAN	Protein arginine N-methyltransferase 8 OS=Homo sapiens GN=PRMT8 PE=1 SV=2	0	0.52	0	0	0.32	0	0
ANO10_HUMAN	Anoctamin-10 OS=Homo sapiens GN=ANO10 PE=1 SV=2	0.13	0.04	0.04	0.09	0	0	0.09
ANO5_HUMAN	Anoctamin-5 OS=Homo sapiens GN=ANO5 PE=1 SV=1	0	0	0.03	0	0	0	0
ANO6_HUMAN	Anoctamin-6 OS=Homo sapiens GN=ANO6 PE=1 SV=2	0.06	0.03	0.06	0	0.03	0	0
ANO9_HUMAN	Anoctamin-9 OS=Homo sapiens GN=ANO9 PE=2 SV=2	0	0	0	0.04	0	0	0
ANR11_HUMAN	Ankyrin repeat domain-containing protein 11 OS=Homo sapiens GN=ANKRD11 PE=1 SV=3	0.02	0.01	0	0	0	0	0
ANR12_HUMAN	Ankyrin repeat domain-containing protein 12 OS=Homo sapiens GN=ANKRD12 PE=1 SV=3	0.01	0	0.01	0.06	0	0	0
ANR16_HUMAN	Ankyrin repeat domain-containing protein 16 OS=Homo sapiens GN=ANKRD16 PE=1 SV=1	0.08	0.08	0	0	0	0	0
ANR17_HUMAN	Ankyrin repeat domain-containing protein 17 OS=Homo sapiens GN=ANKRD17 PE=1 SV=3	0.53	0.53	0.24	0.21	0.06	0	0.18
ANR27_HUMAN	Ankyrin repeat domain-containing protein 27 OS=Homo sapiens GN=ANKRD27 PE=1 SV=2	0.08	0.08	0.03	0.06	0	0	0
ANR28_HUMAN	Serine/threonine-protein phosphatase 6 regulatory ankyrin repeat subunit A OS=Homo sapiens GN=ANKRD28 PE=1 SV=5	0.4	0.36	0.15	0.15	0.03	0.06	0.22
ANR29_HUMAN	Ankyrin repeat domain-containing protein 29 OS=Homo sapiens GN=ANKRD29 PE=2 SV=2	0	0.1	0	0	0	0	0
ANR31_HUMAN	Putative ankyrin repeat domain-containing protein 31 OS=Homo sapiens GN=ANKRD31 PE=5 SV=2	0	0	0	0.02	0	0	0
ANR39_HUMAN	Ankyrin repeat domain-containing protein 39 OS=Homo sapiens GN=ANKRD39 PE=1 SV=1	0.17	0.36	0	0.36	0	0	0
ANR40_HUMAN	Ankyrin repeat domain-containing protein 40 OS=Homo sapiens GN=ANKRD40 PE=1 SV=2	0.17	0.17	0	0	0	0	0
ANR46_HUMAN	Ankyrin repeat domain-containing protein 46 OS=Homo sapiens GN=ANKRD46 PE=1 SV=1	0.27	0.13	0.13	0.27	0	0	0
ANR49_HUMAN	Ankyrin repeat domain-containing protein 49 OS=Homo sapiens GN=ANKRD49 PE=1 SV=1	0.12	0.26	0	0	0	0	0
ANR50_HUMAN	Ankyrin repeat domain-containing protein 50 OS=Homo sapiens GN=ANKRD50 PE=1 SV=4	0.02	0.02	0.02	0	0	0	0
ANR52_HUMAN	Serine/threonine-protein phosphatase 6 regulatory ankyrin repeat subunit C OS=Homo sapiens GN=ANKRD52 PE=1 SV=3	0.21	0.15	0.06	0.03	0	0.03	0
ANR54_HUMAN	Ankyrin repeat domain-containing protein 54 OS=Homo sapiens GN=ANKRD54 PE=1 SV=2	0.33	0.33	0	0.21	0.1	0	0.1
ANS1A_HUMAN	Ankyrin repeat and SAM domain-containing protein 1A OS=Homo sapiens GN=ANKS1A PE=1 SV=4	0.26	0.14	0.05	0.2	0	0.03	0.05
ANT3_HUMAN	Antithrombin-III OS=Homo sapiens GN=SERPINC1 PE=1 SV=1	0.06	0.06	0	0.06	0.06	0.06	0.06
ANTR1_HUMAN	Anthrax toxin receptor 1 OS=Homo sapiens GN=ANTXR1 PE=1 SV=2	0	0.05	0	0	0	0	0
ANX10_HUMAN	Annexin A10 OS=Homo sapiens GN=ANXA10 PE=1 SV=3	0.09	0.18	0.09	0.09	0	0	0.09
ANX11_HUMAN	Annexin A11 OS=Homo sapiens GN=ANXA11 PE=1 SV=1	2.03	2.22	1.4	1.55	0.79	1.02	3.06
ANXA1_HUMAN	Annexin A1 OS=Homo sapiens GN=ANXA1 PE=1 SV=2	1.66	2.13	0.28	1.26	0	0.5	1.26
ANXA2_HUMAN	Annexin A2 OS=Homo sapiens GN=ANXA2 PE=1 SV=2	6.72	8.87	4.57	23.25	2.14	2.7	11.61
ANXA3_HUMAN	Annexin A3 OS=Homo sapiens GN=ANXA3 PE=1 SV=3	1.18	0.68	0.19	0.84	0	0.19	2.68
ANXA4_HUMAN	Annexin A4 OS=Homo sapiens GN=ANXA4 PE=1 SV=4	3.46	3.86	2.42	7.24	1.02	1.21	9.73
ANXA5_HUMAN	Annexin A5 OS=Homo sapiens GN=ANXA5 PE=1 SV=2	2.75	6.59	2.44	30.12	2.15	1.88	39.54
ANXA6_HUMAN	Annexin A6 OS=Homo sapiens GN=ANXA6 PE=1 SV=3	3.76	3.97	1.75	15.89	1.23	2.12	6.9
ANXA7_HUMAN	Annexin A7 OS=Homo sapiens GN=ANXA7 PE=1 SV=3	1.33	1.19	0.94	0.53	0.35	0.44	1.19
ANXA8_HUMAN	Annexin A8 OS=Homo sapiens GN=ANXA8 PE=1 SV=3	0	0.19	0	0	0	0	0
AOAH_HUMAN	Acyloxyacyl hydrolase OS=Homo sapiens GN=AOAH PE=1 SV=1	0	0	0	0.1	0	0	0.05
AOFA_HUMAN	Amine oxidase [flavin-containing] A OS=Homo sapiens GN=MAOA PE=1 SV=1	0.24	0.05	0	0	0	0	0.11
AOFB_HUMAN	Amine oxidase [flavin-containing] B OS=Homo sapiens GN=MAOB PE=1 SV=3	0.11	0	0	0.18	0	0	0.06
AP180_HUMAN	Clathrin coat assembly protein AP180 OS=Homo sapiens GN=SNAP91 PE=1 SV=2	0	0.15	0	0	0	0	0
AP1AR_HUMAN	AP-1 complex-associated regulatory protein OS=Homo sapiens GN=AP1AR PE=1 SV=1	0	0.2	0	0	0	0	0
AP1B1_HUMAN	AP-1 complex subunit beta-1 OS=Homo sapiens GN=AP1B1 PE=1 SV=2	1.83	2	1.15	3.34	0.63	0.58	2.72
AP1G1_HUMAN	AP-1 complex subunit gamma-1 OS=Homo sapiens GN=AP1G1 PE=1 SV=5	1.01	0.94	0.37	1.4	0.32	0.28	0.81
AP1G2_HUMAN	AP-1 complex subunit gamma-like 2 OS=Homo sapiens GN=AP1G2 PE=1 SV=1	0.16	0.25	0.08	0.25	0	0.08	0
AP1M1_HUMAN	AP-1 complex subunit mu-1 OS=Homo sapiens GN=AP1M1 PE=1 SV=3	2.7	1.5	1.34	2.25	0.39	0.69	5.68
AP1M2_HUMAN	AP-1 complex subunit mu-2 OS=Homo sapiens GN=AP1M2 PE=1 SV=4	0	0	0	0	0.14	0	0
AP1S1_HUMAN	AP-1 complex subunit sigma-1A OS=Homo sapiens GN=AP1S1 PE=1 SV=1	2.14	2.14	0.63	0.92	0	0.18	0.18
AP1S2_HUMAN	AP-1 complex subunit sigma-2 OS=Homo sapiens GN=AP1S2 PE=1 SV=1	1.27	2.16	0.39	0.64	0	0.18	0.39
AP1S3_HUMAN	AP-1 complex subunit sigma-3 OS=Homo sapiens GN=AP1S3 PE=1 SV=1	0	0.4	0.4	0	0	0	0
AP2A1_HUMAN	AP-2 complex subunit alpha-1 OS=Homo sapiens GN=AP2A1 PE=1 SV=3	1.74	1.1	1.23	1.83	0.39	0.43	1.1
AP2A2_HUMAN	AP-2 complex subunit alpha-2 OS=Homo sapiens GN=AP2A2 PE=1 SV=2	1.37	1.68	1.22	2.32	0.36	0.4	1.59
AP2A_HUMAN	Transcription factor AP-2-alpha OS=Homo sapiens GN=TFAP2A PE=1 SV=1	0	0.3	0	0	0	0	0.3
AP2B1_HUMAN	AP-2 complex subunit beta OS=Homo sapiens GN=AP2B1 PE=1 SV=1	2.1	1.91	1.35	2.84	0.63	0.68	2.72
AP2B_HUMAN	Transcription factor AP-2-beta OS=Homo sapiens GN=TFAP2B PE=1 SV=2	0.21	0	0	0	0	0	0.21
AP2M1_HUMAN	AP-2 complex subunit mu OS=Homo sapiens GN=AP2M1 PE=1 SV=2	1.15	1.15	0.67	0.89	0.21	0.21	2.83
AP2S1_HUMAN	AP-2 complex subunit sigma OS=Homo sapiens GN=AP2S1 PE=1 SV=2	1.05	1.45	0.2	0.71	0	0	0.71
AP3B1_HUMAN	AP-3 complex subunit beta-1 OS=Homo sapiens GN=AP3B1 PE=1 SV=3	0.89	0.74	0.49	0.84	0.34	0.3	0.65
AP3B2_HUMAN	AP-3 complex subunit beta-2 OS=Homo sapiens GN=AP3B2 PE=1 SV=2	0.21	0	0	0	0	0	0
AP3D1_HUMAN	AP-3 complex subunit delta-1 OS=Homo sapiens GN=AP3D1 PE=1 SV=1	1.42	1.25	0.94	0.99	0.28	0.19	0.8
AP3M1_HUMAN	AP-3 complex subunit mu-1 OS=Homo sapiens GN=AP3M1 PE=1 SV=1	2.37	1.25	0.72	0.14	0.4	0.4	1.1
AP3M2_HUMAN	AP-3 complex subunit mu-2 OS=Homo sapiens GN=AP3M2 PE=1 SV=1	0.72	0	0.14	0	0	0	0
AP3S1_HUMAN	AP-3 complex subunit sigma-1 OS=Homo sapiens GN=AP3S1 PE=1 SV=1	1.03	1.34	1.03	1.34	0.76	0.15	0.53
AP3S2_HUMAN	AP-3 complex subunit sigma-2 OS=Homo sapiens GN=AP3S2 PE=2 SV=1	0.76	0.15	0	0.52	0	0	0
AP4AT_HUMAN	AP-4 complex accessory subunit tepsin OS=Homo sapiens GN=ENTHD2 PE=1 SV=1	0.06	0.26	0	0	0	0	0
AP4A_HUMAN	Bis(5'-nucleosyl)-tetraphosphatase [asymmetrical] OS=Homo sapiens GN=NUDT2 PE=1 SV=3	1.06	2.54	0.72	0.2	0	0	0
AP4B1_HUMAN	AP-4 complex subunit beta-1 OS=Homo sapiens GN=AP4B1 PE=1 SV=2	0.12	0.08	0.08	0.04	0	0	0
AP4E1_HUMAN	AP-4 complex subunit epsilon-1 OS=Homo sapiens GN=AP4E1 PE=1 SV=2	0.03	0	0	0.11	0	0	0.08
AP4M1_HUMAN	AP-4 complex subunit mu-1 OS=Homo sapiens GN=AP4M1 PE=1 SV=2	0.21	0	0	0	0	0	0.29
AP4S1_HUMAN	AP-4 complex subunit sigma-1 OS=Homo sapiens GN=AP4S1 PE=2 SV=1	0	0.43	0	0.2	0	0	0
AP5B1_HUMAN	AP-5 complex subunit beta-1 OS=Homo sapiens GN=AP5B1 PE=1 SV=4	0.07	0.07	0.03	0.18	0	0	0.07
AP5M1_HUMAN	AP-5 complex subunit mu-1 OS=Homo sapiens GN=AP5M1 PE=1 SV=2	0.06	0.19	0	0	0	0	0.12
AP5S1_HUMAN	AP-5 complex subunit sigma-1 OS=Homo sapiens GN=AP5S1 PE=1 SV=1	0.51	0.15	0	0.15	0	0	0
AP5Z1_HUMAN	AP-5 complex subunit zeta-1 OS=Homo sapiens GN=AP5Z1 PE=1 SV=2	0.07	0.07	0.04	0	0	0	0.04
APAF_HUMAN	Apoptotic protease-activating factor 1 OS=Homo sapiens GN=APAF1 PE=1 SV=2	0.28	0.22	0.07	0.09	0.05	0.05	0.09
APBB1_HUMAN	Amyloid beta A4 precursor protein-binding family B member 1 OS=Homo sapiens GN=APBB1 PE=1 SV=2	0.23	0.13	0.04	0.13	0	0	0
APBP2_HUMAN	Amyloid protein-binding protein 2 OS=Homo sapiens GN=APPBP2 PE=1 SV=2	0	0.05	0.05	0	0	0	0
APC10_HUMAN	Anaphase-promoting complex subunit 10 OS=Homo sapiens GN=ANAPC10 PE=1 SV=1	0.34	0	0.16	0.34	0	0	0
APC15_HUMAN	Anaphase-promoting complex subunit 15 OS=Homo sapiens GN=ANAPC15 PE=1 SV=1	0	0.24	0	0.24	0	0	0
APC16_HUMAN	Anaphase-promoting complex subunit 16 OS=Homo sapiens GN=ANAPC16 PE=1 SV=1	0.67	2.6	0.29	0.67	0	0	0
APC1_HUMAN	Anaphase-promoting complex subunit 1 OS=Homo sapiens GN=ANAPC1 PE=1 SV=1	0.29	0.27	0.06	0.14	0.05	0.08	0.08
APC2_HUMAN	Adenomatous polyposis coli protein 2 OS=Homo sapiens GN=APC2 PE=1 SV=1	0	0	0	0	0.01	0	0
APC4_HUMAN	Anaphase-promoting complex subunit 4 OS=Homo sapiens GN=ANAPC4 PE=1 SV=2	0.32	0.32	0.15	0.37	0.04	0.07	0.27
APC5_HUMAN	Anaphase-promoting complex subunit 5 OS=Homo sapiens GN=ANAPC5 PE=1 SV=2	0.69	0.46	0.04	0.46	0	0.04	0.08
APC7_HUMAN	Anaphase-promoting complex subunit 7 OS=Homo sapiens GN=ANAPC7 PE=1 SV=4	1.24	0.77	0.61	0.77	0.33	0.27	0.69
APCD1_HUMAN	Protein APCDD1 OS=Homo sapiens GN=APCDD1 PE=1 SV=1	0	0	0	0	0.06	0	0
APC_HUMAN	Adenomatous polyposis coli protein OS=Homo sapiens GN=APC PE=1 SV=2	0.03	0.06	0.01	0.05	0	0	0
APEX1_HUMAN	DNA-(apurinic or apyrimidinic site) lyase OS=Homo sapiens GN=APEX1 PE=1 SV=2	3.89	3.89	3.1	15.79	0.85	1.21	4.34
APH1A_HUMAN	Gamma-secretase subunit APH-1A OS=Homo sapiens GN=APH1A PE=1 SV=1	0.11	0.24	0.38	0.38	0	0	0.11
API5_HUMAN	Apoptosis inhibitor 5 OS=Homo sapiens GN=API5 PE=1 SV=3	1.95	1.79	1.37	3.07	1.13	1.02	3.79
APLF_HUMAN	Aprataxin and PNK-like factor OS=Homo sapiens GN=APLF PE=1 SV=1	0.06	0.06	0	0	0	0	0
APLP2_HUMAN	Amyloid-like protein 2 OS=Homo sapiens GN=APLP2 PE=1 SV=2	0.04	0.08	0	0	0	0	0
APMAP_HUMAN	Adipocyte plasma membrane-associated protein OS=Homo sapiens GN=APMAP PE=1 SV=2	1.27	0.85	0.61	2.42	0.41	0.61	3.82
APOA1_HUMAN	Apolipoprotein A-I OS=Homo sapiens GN=APOA1 PE=1 SV=1	0.67	1.27	0.11	0.36	0	0	0
APOA4_HUMAN	Apolipoprotein A-IV OS=Homo sapiens GN=APOA4 PE=1 SV=3	0.07	0.15	0	0	0	0	0
APOA5_HUMAN	Apolipoprotein A-V OS=Homo sapiens GN=APOA5 PE=1 SV=1	0	0.08	0	0	0	0	0
APOB_HUMAN	Apolipoprotein B-100 OS=Homo sapiens GN=APOB PE=1 SV=2	0.03	0.03	0.01	0.03	0	0	0
APOC1_HUMAN	Apolipoprotein C-I OS=Homo sapiens GN=APOC1 PE=1 SV=1	0.37	0	0	0	0	0	0
APOC3_HUMAN	Apolipoprotein C-III OS=Homo sapiens GN=APOC3 PE=1 SV=1	0.32	0.74	0	0	0	0	0.32
APOE_HUMAN	Apolipoprotein E OS=Homo sapiens GN=APOE PE=1 SV=1	1.01	2.11	0.19	0.55	0	0.09	0.19
APOH_HUMAN	Beta-2-glycoprotein 1 OS=Homo sapiens GN=APOH PE=1 SV=3	0.08	0.08	0.08	0	0	0	0
APOL2_HUMAN	Apolipoprotein L2 OS=Homo sapiens GN=APOL2 PE=1 SV=1	0.09	0.09	0.19	0.41	0	0	0
APOOL_HUMAN	Apolipoprotein O-like OS=Homo sapiens GN=APOOL PE=1 SV=1	1.12	0.54	0.54	1.12	0	0.11	0.11
APOO_HUMAN	Apolipoprotein O OS=Homo sapiens GN=APOO PE=1 SV=1	0.75	0.75	0.52	1.01	0	0	0.52
APR_HUMAN	Phorbol-12-myristate-13-acetate-induced protein 1 OS=Homo sapiens GN=PMAIP1 PE=1 SV=1	1.53	0	0	0	0	0	0
APTX_HUMAN	Aprataxin OS=Homo sapiens GN=APTX PE=1 SV=2	0.36	0.36	0	0.08	0	0	0
APT_HUMAN	Adenine phosphoribosyltransferase OS=Homo sapiens GN=APRT PE=1 SV=2	2.52	5.6	1.57	11.38	1.57	1.2	6.72
AQP6_HUMAN	Aquaporin-6 OS=Homo sapiens GN=AQP6 PE=2 SV=2	0.11	0	0	0	0	0	0
AQR_HUMAN	Intron-binding protein aquarius OS=Homo sapiens GN=AQR PE=1 SV=4	0.72	0.57	0.25	1.04	0.18	0.12	0.46
AR13B_HUMAN	ADP-ribosylation factor-like protein 13B OS=Homo sapiens GN=ARL13B PE=1 SV=1	0.07	0.07	0	0.07	0	0	0.07
AR2BP_HUMAN	ADP-ribosylation factor-like protein 2-binding protein OS=Homo sapiens GN=ARL2BP PE=1 SV=1	1.68	2.16	0.39	0.64	0.18	0	0.18
AR6P1_HUMAN	ADP-ribosylation factor-like protein 6-interacting protein 1 OS=Homo sapiens GN=ARL6IP1 PE=1 SV=2	0.14	0.3	0.3	0.14	0.3	0.14	0
AR6P4_HUMAN	ADP-ribosylation factor-like protein 6-interacting protein 4 OS=Homo sapiens GN=ARL6IP4 PE=1 SV=1	0.39	0.39	0.39	0.09	0	0.09	0.18
AR6P6_HUMAN	ADP-ribosylation factor-like protein 6-interacting protein 6 OS=Homo sapiens GN=ARL6IP6 PE=1 SV=1	0.13	0.13	0.29	0.13	0	0.29	0
ARAF_HUMAN	Serine/threonine-protein kinase A-Raf OS=Homo sapiens GN=ARAF PE=1 SV=2	0.76	0.53	0.21	0.53	0.1	0.21	0.39
ARAID_HUMAN	All-trans retinoic acid-induced differentiation factor OS=Homo sapiens GN=ATRAID PE=1 SV=2	0.13	0	0	0.13	0	0	0
ARAP1_HUMAN	Arf-GAP with Rho-GAP domain, ANK repeat and PH domain-containing protein 1 OS=Homo sapiens GN=ARAP1 PE=1 SV=3	0.29	0.32	0.06	0.17	0.04	0.02	0.08
ARBK1_HUMAN	Beta-adrenergic receptor kinase 1 OS=Homo sapiens GN=ADRBK1 PE=1 SV=2	0.32	0.32	0.17	0.32	0	0.08	0.04
ARBK2_HUMAN	Beta-adrenergic receptor kinase 2 OS=Homo sapiens GN=ADRBK2 PE=2 SV=2	0	0.17	0	0	0	0	0
ARC1A_HUMAN	Actin-related protein 2/3 complex subunit 1A OS=Homo sapiens GN=ARPC1A PE=1 SV=2	1.48	1.13	0.57	1.48	0.25	0.46	0.35
ARC1B_HUMAN	Actin-related protein 2/3 complex subunit 1B OS=Homo sapiens GN=ARPC1B PE=1 SV=3	1.5	1.5	0.58	2.14	0.46	0.58	0.7
ARCH_HUMAN	Protein archease OS=Homo sapiens GN=ZBTB8OS PE=1 SV=2	0.61	0.61	0.61	0.89	0	0	0
ARF1_HUMAN	ADP-ribosylation factor 1 OS=Homo sapiens GN=ARF1 PE=1 SV=2	7.17	19.09	0	35.6	0.57	0.57	6.03
ARF3_HUMAN	ADP-ribosylation factor 3 OS=Homo sapiens GN=ARF3 PE=1 SV=2	0	0	2.34	0	0	0	0
ARF4_HUMAN	ADP-ribosylation factor 4 OS=Homo sapiens GN=ARF4 PE=1 SV=3	5.11	8.6	2.34	8.6	0.83	0.83	5.11
ARF5_HUMAN	ADP-ribosylation factor 5 OS=Homo sapiens GN=ARF5 PE=1 SV=2	3.52	8.6	1.87	5.11	0	0	2.88
ARF6_HUMAN	ADP-ribosylation factor 6 OS=Homo sapiens GN=ARF6 PE=1 SV=2	0.85	1.94	0.85	1.52	0	0	0.36
ARFG1_HUMAN	ADP-ribosylation factor GTPase-activating protein 1 OS=Homo sapiens GN=ARFGAP1 PE=1 SV=2	1.34	1.03	0.64	0	0.07	0.24	0.53
ARFG2_HUMAN	ADP-ribosylation factor GTPase-activating protein 2 OS=Homo sapiens GN=ARFGAP2 PE=1 SV=1	1.07	0.66	0.48	0.4	0.12	0.12	0.66
ARFG3_HUMAN	ADP-ribosylation factor GTPase-activating protein 3 OS=Homo sapiens GN=ARFGAP3 PE=1 SV=1	0.65	0.48	0.25	0.32	0	0.06	0.12
ARFP1_HUMAN	Arfaptin-1 OS=Homo sapiens GN=ARFIP1 PE=1 SV=2	0.99	1.5	0.46	0.46	0.26	0.26	0.46
ARFP2_HUMAN	Arfaptin-2 OS=Homo sapiens GN=ARFIP2 PE=1 SV=1	0.95	1.12	0.65	0.8	0.52	0.8	0.18
ARFRP_HUMAN	ADP-ribosylation factor-related protein 1 OS=Homo sapiens GN=ARFRP1 PE=1 SV=1	0.31	0.5	0	0.31	0	0	0
ARG28_HUMAN	Rho guanine nucleotide exchange factor 28 OS=Homo sapiens GN=ARHGEF28 PE=1 SV=3	0.02	0	0	0	0	0	0
ARGAL_HUMAN	Rho guanine nucleotide exchange factor 10-like protein OS=Homo sapiens GN=ARHGEF10L PE=1 SV=3	0.02	0	0	0	0	0	0
ARGI1_HUMAN	Arginase-1 OS=Homo sapiens GN=ARG1 PE=1 SV=2	0	0.1	0	0.31	0	0	0
ARGI2_HUMAN	Arginase-2, mitochondrial OS=Homo sapiens GN=ARG2 PE=1 SV=1	0.77	0.63	0.28	0.5	0.18	0.09	0.18
ARGL1_HUMAN	Arginine and glutamate-rich protein 1 OS=Homo sapiens GN=ARGLU1 PE=1 SV=1	0.21	0.33	0.33	0	0	0.1	0.33
ARH38_HUMAN	Rho guanine nucleotide exchange factor 38 OS=Homo sapiens GN=ARHGEF38 PE=2 SV=1	0	0	0	0.13	0	0	0
ARH40_HUMAN	Rho guanine nucleotide exchange factor 40 OS=Homo sapiens GN=ARHGEF40 PE=1 SV=3	0.1	0.15	0.04	0.06	0	0	0
ARHG1_HUMAN	Rho guanine nucleotide exchange factor 1 OS=Homo sapiens GN=ARHGEF1 PE=1 SV=2	0.7	0.5	0.33	0.46	0.03	0.1	0.21
ARHG2_HUMAN	Rho guanine nucleotide exchange factor 2 OS=Homo sapiens GN=ARHGEF2 PE=1 SV=4	0.94	0.73	0.45	0.49	0.15	0.19	0.29
ARHG3_HUMAN	Rho guanine nucleotide exchange factor 3 OS=Homo sapiens GN=ARHGEF3 PE=2 SV=1	0	0.11	0	0	0	0	0
ARHG6_HUMAN	Rho guanine nucleotide exchange factor 6 OS=Homo sapiens GN=ARHGEF6 PE=1 SV=2	0.24	0.2	0.16	0	0	0	0.04
ARHG7_HUMAN	Rho guanine nucleotide exchange factor 7 OS=Homo sapiens GN=ARHGEF7 PE=1 SV=2	0.19	0.24	0.11	0.11	0	0	0
ARHG8_HUMAN	Neuroepithelial cell-transforming gene 1 protein OS=Homo sapiens GN=NET1 PE=1 SV=1	0.21	0.21	0	0	0.05	0.05	0
ARHG9_HUMAN	Rho guanine nucleotide exchange factor 9 OS=Homo sapiens GN=ARHGEF9 PE=1 SV=3	0	0	0	0.11	0	0	0
ARHGA_HUMAN	Rho guanine nucleotide exchange factor 10 OS=Homo sapiens GN=ARHGEF10 PE=1 SV=4	0.02	0.04	0	0.02	0	0	0
ARHGB_HUMAN	Rho guanine nucleotide exchange factor 11 OS=Homo sapiens GN=ARHGEF11 PE=1 SV=1	0.06	0.02	0	0.04	0	0	0
ARHGC_HUMAN	Rho guanine nucleotide exchange factor 12 OS=Homo sapiens GN=ARHGEF12 PE=1 SV=1	0.14	0.14	0.1	0.06	0	0.02	0.02
ARHGG_HUMAN	Rho guanine nucleotide exchange factor 16 OS=Homo sapiens GN=ARHGEF16 PE=1 SV=1	0.13	0.17	0.08	0	0	0	0
ARHGI_HUMAN	Rho guanine nucleotide exchange factor 18 OS=Homo sapiens GN=ARHGEF18 PE=1 SV=3	0.1	0.16	0.05	0.08	0	0	0.05
ARHGQ_HUMAN	Rho guanine nucleotide exchange factor 26 OS=Homo sapiens GN=ARHGEF26 PE=1 SV=4	0.07	0	0	0	0	0	0.03
ARHL2_HUMAN	Poly(ADP-ribose) glycohydrolase ARH3 OS=Homo sapiens GN=ADPRHL2 PE=1 SV=1	1.43	0.91	0.62	1.07	0.38	0.62	0.38
ARH_HUMAN	Low density lipoprotein receptor adapter protein 1 OS=Homo sapiens GN=LDLRAP1 PE=1 SV=3	0.2	0.2	0.1	0.1	0	0	0
ARI1A_HUMAN	AT-rich interactive domain-containing protein 1A OS=Homo sapiens GN=ARID1A PE=1 SV=3	0.41	0.31	0.13	0.31	0.04	0.05	0.04
ARI1B_HUMAN	AT-rich interactive domain-containing protein 1B OS=Homo sapiens GN=ARID1B PE=1 SV=2	0.07	0.07	0.03	0.09	0.01	0	0.01
ARI1_HUMAN	E3 ubiquitin-protein ligase ARIH1 OS=Homo sapiens GN=ARIH1 PE=1 SV=2	0.88	0.88	0.16	0.34	0.1	0.1	0.34
ARI2_HUMAN	E3 ubiquitin-protein ligase ARIH2 OS=Homo sapiens GN=ARIH2 PE=1 SV=1	1.02	0.46	0.31	0.31	0.06	0.18	0.54
ARI3A_HUMAN	AT-rich interactive domain-containing protein 3A OS=Homo sapiens GN=ARID3A PE=1 SV=2	0.75	0.5	0.36	0.36	0.05	0	0.11
ARI3B_HUMAN	AT-rich interactive domain-containing protein 3B OS=Homo sapiens GN=ARID3B PE=1 SV=2	1.21	0.99	0.23	0.3	0.05	0.23	0.23
ARI4A_HUMAN	AT-rich interactive domain-containing protein 4A OS=Homo sapiens GN=ARID4A PE=1 SV=3	0.09	0.07	0	0.02	0	0	0
ARI4B_HUMAN	AT-rich interactive domain-containing protein 4B OS=Homo sapiens GN=ARID4B PE=1 SV=2	0.27	0.19	0.11	0	0	0	0.02
ARID2_HUMAN	AT-rich interactive domain-containing protein 2 OS=Homo sapiens GN=ARID2 PE=1 SV=2	0.18	0.08	0.03	0.1	0	0	0.03
ARIP4_HUMAN	Helicase ARIP4 OS=Homo sapiens GN=RAD54L2 PE=1 SV=4	0.37	0.13	0.02	0.13	0	0	0.08
ARK72_HUMAN	Aflatoxin B1 aldehyde reductase member 2 OS=Homo sapiens GN=AKR7A2 PE=1 SV=3	1.21	1.21	0.37	0.89	0.49	0.74	0.61
ARL10_HUMAN	ADP-ribosylation factor-like protein 10 OS=Homo sapiens GN=ARL10 PE=2 SV=1	0.58	0.12	0.12	0.12	0	0	0.26
ARL14_HUMAN	ADP-ribosylation factor-like protein 14 OS=Homo sapiens GN=ARL14 PE=1 SV=2	0	0	0	0.15	0	0	0
ARL15_HUMAN	ADP-ribosylation factor-like protein 15 OS=Homo sapiens GN=ARL15 PE=1 SV=1	0.5	0.31	0.31	0.31	0.14	0	0.14
ARL1_HUMAN	ADP-ribosylation factor-like protein 1 OS=Homo sapiens GN=ARL1 PE=1 SV=1	0.83	2.91	1.13	1.48	0.16	0.35	0.58
ARL2_HUMAN	ADP-ribosylation factor-like protein 2 OS=Homo sapiens GN=ARL2 PE=1 SV=4	2.26	3.38	1.43	1.81	0.81	0.81	1.09
ARL3_HUMAN	ADP-ribosylation factor-like protein 3 OS=Homo sapiens GN=ARL3 PE=1 SV=2	2.88	4.25	2.34	2.88	0.57	0.35	1.87
ARL5A_HUMAN	ADP-ribosylation factor-like protein 5A OS=Homo sapiens GN=ARL5A PE=1 SV=1	0	0	0	0	0.16	0	0.16
ARL5B_HUMAN	ADP-ribosylation factor-like protein 5B OS=Homo sapiens GN=ARL5B PE=1 SV=1	0.57	0.57	0	0.16	0	0.16	0
ARL6_HUMAN	ADP-ribosylation factor-like protein 6 OS=Homo sapiens GN=ARL6 PE=1 SV=1	1.8	1.42	0.55	0.8	0.16	0	0.34
ARL8A_HUMAN	ADP-ribosylation factor-like protein 8A OS=Homo sapiens GN=ARL8A PE=1 SV=1	3.23	2.17	1.37	1.37	0	0	0.54
ARL8B_HUMAN	ADP-ribosylation factor-like protein 8B OS=Homo sapiens GN=ARL8B PE=1 SV=1	3.2	3.2	2.15	1.05	1.05	0.33	0.77
ARLY_HUMAN	Argininosuccinate lyase OS=Homo sapiens GN=ASL PE=1 SV=4	0.74	0.28	0.06	0	0	0.06	0.54
ARM10_HUMAN	Armadillo repeat-containing protein 10 OS=Homo sapiens GN=ARMC10 PE=1 SV=1	0.29	0.18	0	0.29	0	0	0.8
ARM12_HUMAN	Armadillo repeat-containing protein 12 OS=Homo sapiens GN=ARMC12 PE=2 SV=1	0	0	0	0.08	0	0	0
ARMC1_HUMAN	Armadillo repeat-containing protein 1 OS=Homo sapiens GN=ARMC1 PE=1 SV=1	0.65	1.02	0.49	1.23	0.22	0.49	0.22
ARMC2_HUMAN	Armadillo repeat-containing protein 2 OS=Homo sapiens GN=ARMC2 PE=2 SV=4	0	0	0	0.03	0	0	0
ARMC4_HUMAN	Armadillo repeat-containing protein 4 OS=Homo sapiens GN=ARMC4 PE=2 SV=1	0	0	0	0	0	0	0.03
ARMC5_HUMAN	Armadillo repeat-containing protein 5 OS=Homo sapiens GN=ARMC5 PE=1 SV=2	0	0.03	0	0	0	0	0
ARMC6_HUMAN	Armadillo repeat-containing protein 6 OS=Homo sapiens GN=ARMC6 PE=1 SV=2	0.89	0.79	0.59	0.19	0.19	0.26	0.5
ARMC7_HUMAN	Armadillo repeat-containing protein 7 OS=Homo sapiens GN=ARMC7 PE=1 SV=1	0	0.32	0	0	0	0	0
ARMC8_HUMAN	Armadillo repeat-containing protein 8 OS=Homo sapiens GN=ARMC8 PE=1 SV=2	0.52	0.29	0.34	0.23	0.04	0.09	0.13
ARMC9_HUMAN	LisH domain-containing protein ARMC9 OS=Homo sapiens GN=ARMC9 PE=1 SV=2	0.42	0.32	0.07	0.07	0	0	0
ARMX2_HUMAN	Armadillo repeat-containing X-linked protein 2 OS=Homo sapiens GN=ARMCX2 PE=2 SV=1	0	0	0	0	0.05	0	0
ARMX3_HUMAN	Armadillo repeat-containing X-linked protein 3 OS=Homo sapiens GN=ARMCX3 PE=1 SV=1	0.81	1.1	0.45	0.81	0.25	0.56	0.08
ARMX5_HUMAN	Armadillo repeat-containing X-linked protein 5 OS=Homo sapiens GN=ARMCX5 PE=2 SV=1	0.17	0.17	0.05	0	0	0.05	0
ARNT2_HUMAN	Aryl hydrocarbon receptor nuclear translocator 2 OS=Homo sapiens GN=ARNT2 PE=1 SV=2	0	0	0	0.04	0	0	0
ARNT_HUMAN	Aryl hydrocarbon receptor nuclear translocator OS=Homo sapiens GN=ARNT PE=1 SV=1	0.16	0.16	0.08	0.12	0.04	0.04	0.04
AROS_HUMAN	Active regulator of SIRT1 OS=Homo sapiens GN=RPS19BP1 PE=1 SV=1	1.69	2.99	0.81	1.69	0	0	0.81
ARP10_HUMAN	Actin-related protein 10 OS=Homo sapiens GN=ACTR10 PE=1 SV=1	0.98	0.85	0.5	0	0	0.07	0.41
ARP19_HUMAN	cAMP-regulated phosphoprotein 19 OS=Homo sapiens GN=ARPP19 PE=1 SV=2	1.09	1.67	1.09	0	0	0	0
ARP21_HUMAN	cAMP-regulated phosphoprotein 21 OS=Homo sapiens GN=ARPP21 PE=1 SV=2	0.04	0	0	0	0	0	0
ARP2_HUMAN	Actin-related protein 2 OS=Homo sapiens GN=ACTR2 PE=1 SV=1	1.51	1.34	0.89	0.53	0.64	0.76	2.1
ARP3B_HUMAN	Actin-related protein 3B OS=Homo sapiens GN=ACTR3B PE=2 SV=1	0.3	0	0	0	0	0	0.59
ARP3C_HUMAN	Actin-related protein 3C OS=Homo sapiens GN=ACTR3C PE=2 SV=1	0	0	0	0.48	0	0	0
ARP3_HUMAN	Actin-related protein 3 OS=Homo sapiens GN=ACTR3 PE=1 SV=3	2.79	3.95	1.23	3.95	0.59	0.49	6.39
ARP5L_HUMAN	Actin-related protein 2/3 complex subunit 5-like protein OS=Homo sapiens GN=ARPC5L PE=1 SV=1	3.28	2.57	1.48	1.07	0.44	0.2	0.44
ARP5_HUMAN	Actin-related protein 5 OS=Homo sapiens GN=ACTR5 PE=1 SV=2	0.26	0.26	0.2	0.26	0.15	0.2	0.15
ARP6_HUMAN	Actin-related protein 6 OS=Homo sapiens GN=ACTR6 PE=1 SV=1	0.73	0.41	0.07	0.15	0	0.23	0.41
ARP8_HUMAN	Actin-related protein 8 OS=Homo sapiens GN=ACTR8 PE=1 SV=2	0.64	0.25	0.25	0.09	0	0	0
ARPC2_HUMAN	Actin-related protein 2/3 complex subunit 2 OS=Homo sapiens GN=ARPC2 PE=1 SV=1	4.75	2.31	1.75	9.94	0.74	0.74	24.05
ARPC3_HUMAN	Actin-related protein 2/3 complex subunit 3 OS=Homo sapiens GN=ARPC3 PE=1 SV=3	0.82	0.82	0.57	2.32	0.57	0.57	0.82
ARPC4_HUMAN	Actin-related protein 2/3 complex subunit 4 OS=Homo sapiens GN=ARPC4 PE=1 SV=3	2.52	3.82	1.2	2.52	0.6	0.6	1.2
ARPC5_HUMAN	Actin-related protein 2/3 complex subunit 5 OS=Homo sapiens GN=ARPC5 PE=1 SV=3	2.75	2.1	1.13	1.13	1.13	1.13	1.13
ARRB1_HUMAN	Beta-arrestin-1 OS=Homo sapiens GN=ARRB1 PE=1 SV=2	0.4	0.4	0.22	0.22	0.07	0.07	0.22
ARRB2_HUMAN	Beta-arrestin-2 OS=Homo sapiens GN=ARRB2 PE=1 SV=2	0.51	0.51	0.51	0.41	0.15	0.15	0.98
ARRC_HUMAN	Arrestin-C OS=Homo sapiens GN=ARR3 PE=1 SV=2	0	0	0.08	0	0	0	0
ARRD1_HUMAN	Arrestin domain-containing protein 1 OS=Homo sapiens GN=ARRDC1 PE=2 SV=1	0	0	0	0.15	0	0	0.23
ARSA_HUMAN	Arylsulfatase A OS=Homo sapiens GN=ARSA PE=1 SV=3	0.12	0.12	0.12	0.06	0.06	0	0.06
ARSB_HUMAN	Arylsulfatase B OS=Homo sapiens GN=ARSB PE=1 SV=1	0	0.05	0	0	0	0.05	0
ARSI_HUMAN	Arylsulfatase I OS=Homo sapiens GN=ARSI PE=1 SV=1	0.05	0	0	0	0	0	0
ARV1_HUMAN	Protein ARV1 OS=Homo sapiens GN=ARV1 PE=2 SV=1	0.22	0.11	0	0.11	0	0	0
ARVC_HUMAN	Armadillo repeat protein deleted in velo-cardio-facial syndrome OS=Homo sapiens GN=ARVCF PE=1 SV=1	0.03	0.06	0.03	0	0	0	0
ARY1_HUMAN	Arylamine N-acetyltransferase 1 OS=Homo sapiens GN=NAT1 PE=1 SV=2	0.2	0.2	0	0	0	0	0.45
AS3MT_HUMAN	Arsenite methyltransferase OS=Homo sapiens GN=AS3MT PE=1 SV=3	0.69	1.11	0.45	0.16	0.16	0.16	0.25
ASAH1_HUMAN	Acid ceramidase OS=Homo sapiens GN=ASAH1 PE=1 SV=5	0.89	0.53	0.33	0.53	0.15	0.07	0.24
ASAP1_HUMAN	Arf-GAP with SH3 domain, ANK repeat and PH domain-containing protein 1 OS=Homo sapiens GN=ASAP1 PE=1 SV=4	0.17	0.11	0	0.03	0	0	0
ASAP2_HUMAN	Arf-GAP with SH3 domain, ANK repeat and PH domain-containing protein 2 OS=Homo sapiens GN=ASAP2 PE=1 SV=3	0.09	0	0	0	0	0	0
ASAP3_HUMAN	Arf-GAP with SH3 domain, ANK repeat and PH domain-containing protein 3 OS=Homo sapiens GN=ASAP3 PE=1 SV=1	0.07	0.03	0	0	0	0	0
ASB13_HUMAN	Ankyrin repeat and SOCS box protein 13 OS=Homo sapiens GN=ASB13 PE=1 SV=2	0.11	0	0	0	0	0	0
ASB14_HUMAN	Ankyrin repeat and SOCS box protein 14 OS=Homo sapiens GN=ASB14 PE=2 SV=2	0.05	0	0	0.05	0	0	0
ASB16_HUMAN	Ankyrin repeat and SOCS box protein 16 OS=Homo sapiens GN=ASB16 PE=1 SV=2	0	0	0	0	0	0	0.06
ASB18_HUMAN	Ankyrin repeat and SOCS box protein 18 OS=Homo sapiens GN=ASB18 PE=2 SV=2	0	0	0	0	0	0	0.06
ASB3_HUMAN	Ankyrin repeat and SOCS box protein 3 OS=Homo sapiens GN=ASB3 PE=1 SV=1	0	0.06	0	0	0	0	0
ASB6_HUMAN	Ankyrin repeat and SOCS box protein 6 OS=Homo sapiens GN=ASB6 PE=1 SV=1	0.14	0.14	0	0	0	0	0
ASCC1_HUMAN	Activating signal cointegrator 1 complex subunit 1 OS=Homo sapiens GN=ASCC1 PE=1 SV=1	0.32	0.07	0.23	0	0	0.07	0.07
ASCC2_HUMAN	Activating signal cointegrator 1 complex subunit 2 OS=Homo sapiens GN=ASCC2 PE=1 SV=3	0.39	0.45	0.16	0.25	0	0.04	0.2
ASCC3_HUMAN	Activating signal cointegrator 1 complex subunit 3 OS=Homo sapiens GN=ASCC3 PE=1 SV=3	0.51	0.47	0.18	0.4	0.03	0.04	0.21
ASCL4_HUMAN	Achaete-scute homolog 4 OS=Homo sapiens GN=ASCL4 PE=2 SV=1	0	0.17	0	0	0	0	0
ASC_HUMAN	Apoptosis-associated speck-like protein containing a CARD OS=Homo sapiens GN=PYCARD PE=1 SV=2	0.16	0	0	0	0	0	0
ASF1A_HUMAN	Histone chaperone ASF1A OS=Homo sapiens GN=ASF1A PE=1 SV=1	1.25	1.25	0.15	1.58	0.15	0	0.31
ASF1B_HUMAN	Histone chaperone ASF1B OS=Homo sapiens GN=ASF1B PE=1 SV=1	0.73	0.73	0.15	0.51	0	0	0.32
ASGL1_HUMAN	Isoaspartyl peptidase/L-asparaginase OS=Homo sapiens GN=ASRGL1 PE=1 SV=2	1.41	1.18	0.8	0.48	0.1	0.1	0.1
ASGR1_HUMAN	Asialoglycoprotein receptor 1 OS=Homo sapiens GN=ASGR1 PE=1 SV=2	0.6	0.76	0.1	0	0	0	0.1
ASH1L_HUMAN	Histone-lysine N-methyltransferase ASH1L OS=Homo sapiens GN=ASH1L PE=1 SV=2	0	0	0.01	0.01	0	0	0
ASH2L_HUMAN	Set1/Ash2 histone methyltransferase complex subunit ASH2 OS=Homo sapiens GN=ASH2L PE=1 SV=1	1.1	0.74	0.66	0.59	0.05	0.1	0.15
ASHWN_HUMAN	Ashwin OS=Homo sapiens GN=C2orf49 PE=1 SV=1	1.07	1.34	0.44	0.44	0	0.13	0.13
ASIC1_HUMAN	Acid-sensing ion channel 1 OS=Homo sapiens GN=ASIC1 PE=1 SV=3	0	0.05	0	0	0	0	0
ASIC4_HUMAN	Acid-sensing ion channel 4 OS=Homo sapiens GN=ASIC4 PE=1 SV=2	0	0	0	0.09	0	0	0
ASM3A_HUMAN	Acid sphingomyelinase-like phosphodiesterase 3a OS=Homo sapiens GN=SMPDL3A PE=1 SV=2	0	0.06	0	0	0	0	0
ASM3B_HUMAN	Acid sphingomyelinase-like phosphodiesterase 3b OS=Homo sapiens GN=SMPDL3B PE=2 SV=2	0.37	0.13	0.06	0.06	0	0	0.13
ASML_HUMAN	N-acetylserotonin O-methyltransferase-like protein OS=Homo sapiens GN=ASMTL PE=1 SV=3	0.66	0.45	0.1	0.38	0	0.05	0.1
ASM_HUMAN	Sphingomyelin phosphodiesterase OS=Homo sapiens GN=SMPD1 PE=1 SV=4	0	0.1	0	0	0	0.05	0
ASNA_HUMAN	ATPase ASNA1 OS=Homo sapiens GN=ASNA1 PE=1 SV=2	1.25	1.25	0.38	0.76	0.18	0.28	0.18
ASND1_HUMAN	Asparagine synthetase domain-containing protein 1 OS=Homo sapiens GN=ASNSD1 PE=2 SV=2	0.14	0.09	0.09	0.19	0	0	0
ASNS_HUMAN	Asparagine synthetase [glutamine-hydrolyzing] OS=Homo sapiens GN=ASNS PE=1 SV=4	2.61	1.55	1.55	3.62	0.72	1.31	5.21
ASPC1_HUMAN	Tether containing UBX domain for GLUT4 OS=Homo sapiens GN=ASPSCR1 PE=1 SV=1	1.33	0.37	0.45	0.7	0.11	0.3	0.24
ASPG_HUMAN	N(4)-(beta-N-acetylglucosaminyl)-L-asparaginase OS=Homo sapiens GN=AGA PE=1 SV=2	0.52	0.29	0.18	0.09	0	0	0
ASPH2_HUMAN	Aspartate beta-hydroxylase domain-containing protein 2 OS=Homo sapiens GN=ASPHD2 PE=2 SV=1	0	0	0	0	0	0	0.08
ASPH_HUMAN	Aspartyl/asparaginyl beta-hydroxylase OS=Homo sapiens GN=ASPH PE=1 SV=3	0.75	0.62	0.35	0.89	0.08	0.12	0.3
ASPM_HUMAN	Abnormal spindle-like microcephaly-associated protein OS=Homo sapiens GN=ASPM PE=1 SV=2	0	0.02	0	0	0	0	0.02
ASPP1_HUMAN	Apoptosis-stimulating of p53 protein 1 OS=Homo sapiens GN=PPP1R13B PE=1 SV=3	0	0.06	0	0	0	0	0
ASPP2_HUMAN	Apoptosis-stimulating of p53 protein 2 OS=Homo sapiens GN=TP53BP2 PE=1 SV=2	0.2	0.08	0.11	0.17	0	0.03	0.05
ASSY_HUMAN	Argininosuccinate synthase OS=Homo sapiens GN=ASS1 PE=1 SV=2	0.73	0.73	0.15	0	0.15	0.15	0.51
ASTE1_HUMAN	Protein asteroid homolog 1 OS=Homo sapiens GN=ASTE1 PE=2 SV=1	0.18	0.09	0	0	0	0	0
ASTER_HUMAN	Protein Asterix OS=Homo sapiens GN=WDR83OS PE=1 SV=1	0.28	0	0	0	0	0	0
ASUN_HUMAN	Protein asunder homolog OS=Homo sapiens GN=ASUN PE=1 SV=2	0.55	0.67	0.04	0.55	0.04	0.04	0.08
ASXL1_HUMAN	Putative Polycomb group protein ASXL1 OS=Homo sapiens GN=ASXL1 PE=1 SV=3	0	0.04	0	0.04	0	0	0
ASXL2_HUMAN	Putative Polycomb group protein ASXL2 OS=Homo sapiens GN=ASXL2 PE=1 SV=1	0.06	0.06	0	0	0	0	0
ASZ1_HUMAN	Ankyrin repeat, SAM and basic leucine zipper domain-containing protein 1 OS=Homo sapiens GN=ASZ1 PE=2 SV=1	0	0	0	0	0.06	0	0
AT10B_HUMAN	Probable phospholipid-transporting ATPase VB OS=Homo sapiens GN=ATP10B PE=2 SV=2	0	0	0	0.04	0	0	0
AT10D_HUMAN	Probable phospholipid-transporting ATPase VD OS=Homo sapiens GN=ATP10D PE=2 SV=3	0	0	0	0.02	0	0	0
AT11A_HUMAN	Probable phospholipid-transporting ATPase IH OS=Homo sapiens GN=ATP11A PE=1 SV=3	0.05	0	0	0	0.08	0	0
AT11C_HUMAN	Probable phospholipid-transporting ATPase IG OS=Homo sapiens GN=ATP11C PE=1 SV=3	0.16	0.13	0.1	0.08	0.05	0	0.16
AT12A_HUMAN	Potassium-transporting ATPase alpha chain 2 OS=Homo sapiens GN=ATP12A PE=1 SV=3	0	0.15	0	0.18	0	0	0
AT131_HUMAN	Probable cation-transporting ATPase 13A1 OS=Homo sapiens GN=ATP13A1 PE=1 SV=2	0.78	0.37	0.37	0.3	0.13	0.07	0.33
AT133_HUMAN	Probable cation-transporting ATPase 13A3 OS=Homo sapiens GN=ATP13A3 PE=1 SV=4	0.02	0.05	0	0	0	0	0
AT1A1_HUMAN	Sodium/potassium-transporting ATPase subunit alpha-1 OS=Homo sapiens GN=ATP1A1 PE=1 SV=1	3.11	2.28	1.33	3.35	0.97	0.86	2.01
AT1A2_HUMAN	Sodium/potassium-transporting ATPase subunit alpha-2 OS=Homo sapiens GN=ATP1A2 PE=1 SV=1	0.87	0.62	0.37	0.76	0	0	0.58
AT1A3_HUMAN	Sodium/potassium-transporting ATPase subunit alpha-3 OS=Homo sapiens GN=ATP1A3 PE=1 SV=3	0.98	0.67	0.45	0.98	0	0.49	0
AT1B1_HUMAN	Sodium/potassium-transporting ATPase subunit beta-1 OS=Homo sapiens GN=ATP1B1 PE=1 SV=1	0.43	0.87	0.31	0.43	0.2	0.2	0.56
AT1B2_HUMAN	Sodium/potassium-transporting ATPase subunit beta-2 OS=Homo sapiens GN=ATP1B2 PE=1 SV=3	0.1	0	0	0	0	0	0
AT1B3_HUMAN	Sodium/potassium-transporting ATPase subunit beta-3 OS=Homo sapiens GN=ATP1B3 PE=1 SV=1	1.44	1	1.21	1.7	0.64	0.64	1
AT2A2_HUMAN	Sarcoplasmic/endoplasmic reticulum calcium ATPase 2 OS=Homo sapiens GN=ATP2A2 PE=1 SV=1	1.3	1.57	0.74	1.79	0.47	0.6	1.23
AT2B1_HUMAN	Plasma membrane calcium-transporting ATPase 1 OS=Homo sapiens GN=ATP2B1 PE=1 SV=3	0.82	0.7	0.32	0.52	0.1	0.15	0.32
AT2B3_HUMAN	Plasma membrane calcium-transporting ATPase 3 OS=Homo sapiens GN=ATP2B3 PE=1 SV=3	0	0	0	0.18	0	0	0.15
AT2B4_HUMAN	Plasma membrane calcium-transporting ATPase 4 OS=Homo sapiens GN=ATP2B4 PE=1 SV=2	0.71	0.55	0.32	0.38	0.1	0.15	0.29
AT2C1_HUMAN	Calcium-transporting ATPase type 2C member 1 OS=Homo sapiens GN=ATP2C1 PE=1 SV=3	0.29	0.07	0.03	0.14	0	0	0
AT2C2_HUMAN	Calcium-transporting ATPase type 2C member 2 OS=Homo sapiens GN=ATP2C2 PE=1 SV=2	0	0	0	0.03	0	0	0
AT2L1_HUMAN	Ethanolamine-phosphate phospho-lyase OS=Homo sapiens GN=ETNPPL PE=1 SV=1	0	0.06	0.06	0.06	0	0	0.06
AT5EL_HUMAN	ATP synthase subunit epsilon-like protein, mitochondrial OS=Homo sapiens GN=ATP5EP2 PE=3 SV=1	0	0.61	0	0	0	0	0
AT5F1_HUMAN	ATP synthase subunit b, mitochondrial OS=Homo sapiens GN=ATP5F1 PE=1 SV=2	2.31	0.72	0.92	6.9	0.72	0.72	3.11
AT5SL_HUMAN	ATP synthase subunit s-like protein OS=Homo sapiens GN=ATP5SL PE=2 SV=3	0.24	0	0.24	0.24	0	0	0.53
AT7L2_HUMAN	Ataxin-7-like protein 2 OS=Homo sapiens GN=ATXN7L2 PE=2 SV=1	0	0.04	0	0	0	0	0
AT8A1_HUMAN	Probable phospholipid-transporting ATPase IA OS=Homo sapiens GN=ATP8A1 PE=1 SV=1	0.05	0.1	0	0	0	0	0
AT8B3_HUMAN	Probable phospholipid-transporting ATPase IK OS=Homo sapiens GN=ATP8B3 PE=2 SV=4	0	0.02	0	0	0	0	0
ATAD1_HUMAN	ATPase family AAA domain-containing protein 1 OS=Homo sapiens GN=ATAD1 PE=1 SV=1	1.01	1.01	0.26	1.74	0	0.17	0.86
ATAD2_HUMAN	ATPase family AAA domain-containing protein 2 OS=Homo sapiens GN=ATAD2 PE=1 SV=1	0.35	0.35	0.22	0.3	0	0.04	0.15
ATAD5_HUMAN	ATPase family AAA domain-containing protein 5 OS=Homo sapiens GN=ATAD5 PE=1 SV=4	0.15	0.06	0.06	0.05	0	0	0.02
ATAT_HUMAN	Alpha-tubulin N-acetyltransferase OS=Homo sapiens GN=ATAT1 PE=1 SV=1	0.15	0.07	0.15	0	0	0	0
ATD2B_HUMAN	ATPase family AAA domain-containing protein 2B OS=Homo sapiens GN=ATAD2B PE=1 SV=3	0.17	0.12	0.04	0.04	0	0	0.04
ATD3A_HUMAN	ATPase family AAA domain-containing protein 3A OS=Homo sapiens GN=ATAD3A PE=1 SV=2	1.05	1.24	0.71	1.93	0.43	0.5	1.68
ATD3B_HUMAN	ATPase family AAA domain-containing protein 3B OS=Homo sapiens GN=ATAD3B PE=1 SV=1	1.11	0.85	0.48	1.41	0.48	0.69	1.11
ATE1_HUMAN	Arginyl-tRNA--protein transferase 1 OS=Homo sapiens GN=ATE1 PE=1 SV=2	0.38	0.17	0	0.05	0	0	0.11
ATF2_HUMAN	Cyclic AMP-dependent transcription factor ATF-2 OS=Homo sapiens GN=ATF2 PE=1 SV=4	0.26	0	0	0.06	0	0	0
ATF3_HUMAN	Cyclic AMP-dependent transcription factor ATF-3 OS=Homo sapiens GN=ATF3 PE=1 SV=2	0.16	0.16	0	0.16	0	0	0
ATF6B_HUMAN	Cyclic AMP-dependent transcription factor ATF-6 beta OS=Homo sapiens GN=ATF6B PE=1 SV=2	0.04	0	0	0	0	0	0
ATF7_HUMAN	Cyclic AMP-dependent transcription factor ATF-7 OS=Homo sapiens GN=ATF7 PE=1 SV=2	0.2	0.27	0	0	0	0	0
ATG12_HUMAN	Ubiquitin-like protein ATG12 OS=Homo sapiens GN=ATG12 PE=1 SV=1	0.22	0.22	0.22	0.22	0	0	0
ATG13_HUMAN	Autophagy-related protein 13 OS=Homo sapiens GN=ATG13 PE=1 SV=1	0.12	0.06	0	0.06	0	0	0
ATG2A_HUMAN	Autophagy-related protein 2 homolog A OS=Homo sapiens GN=ATG2A PE=1 SV=3	0.08	0.05	0.02	0.03	0	0	0
ATG2B_HUMAN	Autophagy-related protein 2 homolog B OS=Homo sapiens GN=ATG2B PE=1 SV=5	0.12	0.09	0.06	0.06	0	0	0
ATG3_HUMAN	Ubiquitin-like-conjugating enzyme ATG3 OS=Homo sapiens GN=ATG3 PE=1 SV=1	1.01	1.01	0.3	0.55	0.3	0.3	0.3
ATG4A_HUMAN	Cysteine protease ATG4A OS=Homo sapiens GN=ATG4A PE=1 SV=1	0.23	0.07	0.15	0	0	0	0
ATG4B_HUMAN	Cysteine protease ATG4B OS=Homo sapiens GN=ATG4B PE=1 SV=2	0.89	1.34	0.33	0	0	0.07	0.76
ATG4C_HUMAN	Cysteine protease ATG4C OS=Homo sapiens GN=ATG4C PE=1 SV=1	0.2	0.06	0.06	0.06	0	0.13	0.06
ATG5_HUMAN	Autophagy protein 5 OS=Homo sapiens GN=ATG5 PE=1 SV=2	1.17	0.97	0.34	0.62	0.34	0.21	0.47
ATG7_HUMAN	Ubiquitin-like modifier-activating enzyme ATG7 OS=Homo sapiens GN=ATG7 PE=1 SV=1	0.7	0.44	0.23	0.77	0.13	0.18	0.18
ATG9A_HUMAN	Autophagy-related protein 9A OS=Homo sapiens GN=ATG9A PE=1 SV=3	0.36	0.4	0.18	0.03	0.03	0.03	0
ATGA1_HUMAN	Autophagy-related protein 101 OS=Homo sapiens GN=ATG101 PE=1 SV=1	0.13	0.13	0	0.28	0	0	0.13
ATIF1_HUMAN	ATPase inhibitor, mitochondrial OS=Homo sapiens GN=ATPIF1 PE=1 SV=1	1.69	0.28	0	0	0	0	0
ATL4_HUMAN	ADAMTS-like protein 4 OS=Homo sapiens GN=ADAMTSL4 PE=1 SV=2	0	0	0	0	0	0	0.03
ATLA1_HUMAN	Atlastin-1 OS=Homo sapiens GN=ATL1 PE=1 SV=1	0.11	0	0.05	0.11	0	0	0
ATLA2_HUMAN	Atlastin-2 OS=Homo sapiens GN=ATL2 PE=1 SV=2	0.33	0.21	0.1	0.47	0.05	0.05	0.15
ATLA3_HUMAN	Atlastin-3 OS=Homo sapiens GN=ATL3 PE=1 SV=1	0.6	0.69	0.17	0.23	0	0.05	0.37
ATM_HUMAN	Serine-protein kinase ATM OS=Homo sapiens GN=ATM PE=1 SV=3	0.09	0.12	0.03	0.15	0	0.01	0.03
ATOX1_HUMAN	Copper transport protein ATOX1 OS=Homo sapiens GN=ATOX1 PE=1 SV=1	5.83	5.83	1.16	0.47	0	0	1.16
ATP4A_HUMAN	Potassium-transporting ATPase alpha chain 1 OS=Homo sapiens GN=ATP4A PE=2 SV=5	0	0	0	0	0.12	0	0
ATP4B_HUMAN	Potassium-transporting ATPase subunit beta OS=Homo sapiens GN=ATP4B PE=1 SV=1	0.1	0	0	0	0	0	0
ATP5E_HUMAN	ATP synthase subunit epsilon, mitochondrial OS=Homo sapiens GN=ATP5E PE=1 SV=2	0.61	0	0.61	0	0	0	1.6
ATP5H_HUMAN	ATP synthase subunit d, mitochondrial OS=Homo sapiens GN=ATP5H PE=1 SV=3	2.81	7.78	2.81	13.5	0.95	1.31	6.43
ATP5I_HUMAN	ATP synthase subunit e, mitochondrial OS=Homo sapiens GN=ATP5I PE=1 SV=2	2.03	5.35	1.09	3.39	0	0	2.03
ATP5J_HUMAN	ATP synthase-coupling factor 6, mitochondrial OS=Homo sapiens GN=ATP5J PE=1 SV=1	0.62	0.62	0	0.27	0	0	0.27
ATP5L_HUMAN	ATP synthase subunit g, mitochondrial OS=Homo sapiens GN=ATP5L PE=1 SV=3	2.73	5.32	2.73	1.87	0	0	2.73
ATP5S_HUMAN	ATP synthase subunit s, mitochondrial OS=Homo sapiens GN=ATP5S PE=1 SV=3	0.64	0.13	0.13	0.64	0.13	0	0.13
ATP6_HUMAN	ATP synthase subunit a OS=Homo sapiens GN=MT-ATP6 PE=1 SV=1	0.14	0.14	0.14	0.14	0.14	0.14	0.14
ATP7A_HUMAN	Copper-transporting ATPase 1 OS=Homo sapiens GN=ATP7A PE=1 SV=3	0.15	0.04	0.02	0.04	0	0	0
ATP7B_HUMAN	Copper-transporting ATPase 2 OS=Homo sapiens GN=ATP7B PE=1 SV=4	0.13	0.06	0	0	0	0	0
ATP8_HUMAN	ATP synthase protein 8 OS=Homo sapiens GN=MT-ATP8 PE=1 SV=1	0.44	0	0	0.44	0	0	0
ATP9A_HUMAN	Probable phospholipid-transporting ATPase IIA OS=Homo sapiens GN=ATP9A PE=1 SV=3	0	0.03	0	0	0	0	0
ATP9B_HUMAN	Probable phospholipid-transporting ATPase IIB OS=Homo sapiens GN=ATP9B PE=2 SV=4	0	0.02	0	0	0	0.02	0
ATPA_HUMAN	ATP synthase subunit alpha, mitochondrial OS=Homo sapiens GN=ATP5A1 PE=1 SV=1	4.54	5.51	3.24	11.37	2.61	2.61	14.32
ATPB_HUMAN	ATP synthase subunit beta, mitochondrial OS=Homo sapiens GN=ATP5B PE=1 SV=3	6.26	10.41	5.12	24.21	3.88	5.48	30.62
ATPD_HUMAN	ATP synthase subunit delta, mitochondrial OS=Homo sapiens GN=ATP5D PE=1 SV=2	1.03	1.43	1.03	0.43	0	0	1.03
ATPF1_HUMAN	ATP synthase mitochondrial F1 complex assembly factor 1 OS=Homo sapiens GN=ATPAF1 PE=1 SV=1	1.17	1.82	0.83	1.82	0.19	0.41	3.73
ATPF2_HUMAN	ATP synthase mitochondrial F1 complex assembly factor 2 OS=Homo sapiens GN=ATPAF2 PE=1 SV=1	1.15	0.62	0.47	2.16	0.1	0.21	0.62
ATPG_HUMAN	ATP synthase subunit gamma, mitochondrial OS=Homo sapiens GN=ATP5C1 PE=1 SV=1	1.86	2.15	1.6	4.08	0.78	0.95	4.08
ATPK_HUMAN	ATP synthase subunit f, mitochondrial OS=Homo sapiens GN=ATP5J2 PE=1 SV=3	1.98	2.92	0.31	1.27	0	0	0.73
ATPO_HUMAN	ATP synthase subunit O, mitochondrial OS=Homo sapiens GN=ATP5O PE=1 SV=1	1.55	4.68	1.55	6.42	1.23	1.23	2.33
ATRAP_HUMAN	Type-1 angiotensin II receptor-associated protein OS=Homo sapiens GN=AGTRAP PE=1 SV=1	1.41	1.41	0.7	0.7	0	0	0.19
ATRIP_HUMAN	ATR-interacting protein OS=Homo sapiens GN=ATRIP PE=1 SV=1	0.16	0.08	0.04	0	0.08	0.04	0.04
ATRN_HUMAN	Attractin OS=Homo sapiens GN=ATRN PE=1 SV=2	0.02	0.04	0.02	0	0	0	0.02
ATRX_HUMAN	Transcriptional regulator ATRX OS=Homo sapiens GN=ATRX PE=1 SV=5	0.19	0.27	0.06	0.08	0.05	0.02	0.03
ATR_HUMAN	Serine/threonine-protein kinase ATR OS=Homo sapiens GN=ATR PE=1 SV=3	0.21	0.12	0.09	0.19	0.02	0.01	0.03
ATS14_HUMAN	A disintegrin and metalloproteinase with thrombospondin motifs 14 OS=Homo sapiens GN=ADAMTS14 PE=2 SV=2	0	0	0	0.02	0	0	0
ATS15_HUMAN	A disintegrin and metalloproteinase with thrombospondin motifs 15 OS=Homo sapiens GN=ADAMTS15 PE=2 SV=1	0	0	0	0.03	0	0	0
ATS5_HUMAN	A disintegrin and metalloproteinase with thrombospondin motifs 5 OS=Homo sapiens GN=ADAMTS5 PE=1 SV=2	0.03	0	0	0	0	0	0
ATTY_HUMAN	Tyrosine aminotransferase OS=Homo sapiens GN=TAT PE=1 SV=1	0	0	0.13	0.06	0	0	0
ATX10_HUMAN	Ataxin-10 OS=Homo sapiens GN=ATXN10 PE=1 SV=1	2.07	2.45	1.89	1.03	0.6	0.8	4.22
ATX1L_HUMAN	Ataxin-1-like OS=Homo sapiens GN=ATXN1L PE=1 SV=1	0	0.04	0	0	0	0	0
ATX2L_HUMAN	Ataxin-2-like protein OS=Homo sapiens GN=ATXN2L PE=1 SV=2	0.76	0.98	0.22	1.15	0.41	0.37	0.67
ATX2_HUMAN	Ataxin-2 OS=Homo sapiens GN=ATXN2 PE=1 SV=2	0.41	0.66	0.2	0.32	0	0.05	0.12
ATX3_HUMAN	Ataxin-3 OS=Homo sapiens GN=ATXN3 PE=1 SV=4	0.7	0.16	0.08	0	0	0	0.16
ATX7_HUMAN	Ataxin-7 OS=Homo sapiens GN=ATXN7 PE=1 SV=1	0.03	0	0	0	0	0	0
AUHM_HUMAN	Methylglutaconyl-CoA hydratase, mitochondrial OS=Homo sapiens GN=AUH PE=1 SV=1	0.19	0.3	0.3	0.3	0.19	0.09	1.03
AUNIP_HUMAN	Aurora kinase A and ninein-interacting protein OS=Homo sapiens GN=AUNIP PE=1 SV=1	0	0.08	0	0	0	0	0
AUP1_HUMAN	Ancient ubiquitous protein 1 OS=Homo sapiens GN=AUP1 PE=1 SV=1	0.27	0.43	0.13	0.13	0.27	0.2	0
AURKA_HUMAN	Aurora kinase A OS=Homo sapiens GN=AURKA PE=1 SV=2	0.32	0.23	0.15	0	0	0	0.62
AURKB_HUMAN	Aurora kinase B OS=Homo sapiens GN=AURKB PE=1 SV=3	0.76	0.38	0.27	1.06	0.17	0.27	1.06
AUTS2_HUMAN	Autism susceptibility gene 2 protein OS=Homo sapiens GN=AUTS2 PE=1 SV=1	0.02	0	0	0	0	0	0
AUXI_HUMAN	Putative tyrosine-protein phosphatase auxilin OS=Homo sapiens GN=DNAJC6 PE=1 SV=3	0.03	0.07	0	0	0	0	0.03
AVEN_HUMAN	Cell death regulator Aven OS=Homo sapiens GN=AVEN PE=1 SV=1	0.39	0.39	0	0	0	0	0.18
AVL9_HUMAN	Late secretory pathway protein AVL9 homolog OS=Homo sapiens GN=AVL9 PE=1 SV=1	0.31	0.36	0.09	0.19	0	0.19	0.19
AXDN1_HUMAN	Axonemal dynein light chain domain-containing protein 1 OS=Homo sapiens GN=AXDND1 PE=2 SV=1	0	0	0.03	0.06	0	0	0.06
AXIN1_HUMAN	Axin-1 OS=Homo sapiens GN=AXIN1 PE=1 SV=2	0.03	0.11	0	0	0.03	0	0
AXIN2_HUMAN	Axin-2 OS=Homo sapiens GN=AXIN2 PE=1 SV=1	0	0	0	0	0	0	0.03
AZI1_HUMAN	5-azacytidine-induced protein 1 OS=Homo sapiens GN=AZI1 PE=1 SV=3	0.27	0.17	0.03	0.03	0	0	0.03
AZI2_HUMAN	5-azacytidine-induced protein 2 OS=Homo sapiens GN=AZI2 PE=1 SV=1	0.07	0.07	0	0	0	0	0
Accession	Description	emPAI	emPAI	emPAI	emPAI	emPAI	emPAI	emPAI
B2CL1_HUMAN	Bcl-2-like protein 1 OS=Homo sapiens GN=BCL2L1 PE=1 SV=1	0	0.27	0	0.27	0	0	0
B2CL2_HUMAN	Bcl-2-like protein 2 OS=Homo sapiens GN=BCL2L2 PE=1 SV=2	0.35	0.35	0	0	0	0	0
B2L11_HUMAN	Bcl-2-like protein 11 OS=Homo sapiens GN=BCL2L11 PE=1 SV=1	0.15	0	0	0	0	0	0
B2L12_HUMAN	Bcl-2-like protein 12 OS=Homo sapiens GN=BCL2L12 PE=1 SV=1	0.19	0.29	0.29	0.29	0	0.19	0.67
B2L13_HUMAN	Bcl-2-like protein 13 OS=Homo sapiens GN=BCL2L13 PE=1 SV=1	1.2	0.62	0.44	1.63	0.13	0.06	0.53
B2MG_HUMAN	Beta-2-microglobulin OS=Homo sapiens GN=B2M PE=1 SV=1	0.25	0.93	0	0	0	0	0
B3A2_HUMAN	Anion exchange protein 2 OS=Homo sapiens GN=SLC4A2 PE=1 SV=4	0.26	0.18	0.12	0.07	0	0	0.02
B3A3_HUMAN	Anion exchange protein 3 OS=Homo sapiens GN=SLC4A3 PE=2 SV=2	0.05	0	0	0.02	0	0	0
B3GA2_HUMAN	Galactosylgalactosylxylosylprotein 3-beta-glucuronosyltransferase 2 OS=Homo sapiens GN=B3GAT2 PE=1 SV=2	0	0	0	0.09	0	0	0
B3GA3_HUMAN	Galactosylgalactosylxylosylprotein 3-beta-glucuronosyltransferase 3 OS=Homo sapiens GN=B3GAT3 PE=1 SV=2	0.67	0.67	0.29	0.29	0.19	0.19	0.09
B3GLT_HUMAN	Beta-1,3-glucosyltransferase OS=Homo sapiens GN=B3GALTL PE=1 SV=2	0.32	0.18	0.12	0.06	0	0	0.12
B3GN1_HUMAN	N-acetyllactosaminide beta-1,3-N-acetylglucosaminyltransferase OS=Homo sapiens GN=B3GNT1 PE=1 SV=1	0.4	0.22	0.14	0.14	0.14	0.22	0.31
B3GN4_HUMAN	UDP-GlcNAc:betaGal beta-1,3-N-acetylglucosaminyltransferase 4 OS=Homo sapiens GN=B3GNT4 PE=2 SV=1	0	0	0	0.08	0	0	0
B3GT6_HUMAN	Beta-1,3-galactosyltransferase 6 OS=Homo sapiens GN=B3GALT6 PE=2 SV=2	0.18	0.29	0.09	0.09	0.09	0.18	0
B4GN1_HUMAN	Beta-1,4 N-acetylgalactosaminyltransferase 1 OS=Homo sapiens GN=B4GALNT1 PE=1 SV=2	0.06	0	0	0	0	0	0
B4GT1_HUMAN	Beta-1,4-galactosyltransferase 1 OS=Homo sapiens GN=B4GALT1 PE=1 SV=5	0.24	0.15	0	0	0	0.07	0.15
B4GT4_HUMAN	Beta-1,4-galactosyltransferase 4 OS=Homo sapiens GN=B4GALT4 PE=1 SV=1	0	0.08	0	0	0	0	0
B4GT5_HUMAN	Beta-1,4-galactosyltransferase 5 OS=Homo sapiens GN=B4GALT5 PE=2 SV=1	0.15	0.15	0.15	0.15	0	0	0.15
B4GT7_HUMAN	Beta-1,4-galactosyltransferase 7 OS=Homo sapiens GN=B4GALT7 PE=1 SV=1	0.09	0	0	0	0	0	0
BABA1_HUMAN	BRISC and BRCA1-A complex member 1 OS=Homo sapiens GN=BABAM1 PE=1 SV=1	0.41	0.82	0.29	0.19	0	0.09	0.19
BACD3_HUMAN	BTB/POZ domain-containing adapter for CUL3-mediated RhoA degradation protein 3 OS=Homo sapiens GN=KCTD10 PE=1 SV=1	0.09	0	0	0	0	0	0
BACE1_HUMAN	Beta-secretase 1 OS=Homo sapiens GN=BACE1 PE=1 SV=2	0	0	0	0	0	0	0.06
BACH1_HUMAN	Transcription regulator protein BACH1 OS=Homo sapiens GN=BACH1 PE=1 SV=2	0.04	0.26	0	0.04	0	0	0
BACHL_HUMAN	Cytosolic acyl coenzyme A thioester hydrolase-like OS=Homo sapiens GN=ACOT7L PE=1 SV=1	0.12	0.12	0	0	0	0	0
BACH_HUMAN	Cytosolic acyl coenzyme A thioester hydrolase OS=Homo sapiens GN=ACOT7 PE=1 SV=3	1.28	1.65	0.82	4.21	0.57	0.69	1.46
BAD_HUMAN	Bcl2 antagonist of cell death OS=Homo sapiens GN=BAD PE=1 SV=3	0.66	0.4	0	0.18	0	0	0
BAF_HUMAN	Barrier-to-autointegration factor OS=Homo sapiens GN=BANF1 PE=1 SV=1	3.25	2.18	1.38	4.67	0	0	2.18
BAG1_HUMAN	BAG family molecular chaperone regulator 1 OS=Homo sapiens GN=BAG1 PE=1 SV=4	0.5	0.18	0	0	0	0	0.08
BAG2_HUMAN	BAG family molecular chaperone regulator 2 OS=Homo sapiens GN=BAG2 PE=1 SV=1	1.84	2.24	0.69	3.79	0.3	0.48	0.92
BAG3_HUMAN	BAG family molecular chaperone regulator 3 OS=Homo sapiens GN=BAG3 PE=1 SV=3	0.77	1.18	0.3	0.3	0.11	0.05	0.05
BAG4_HUMAN	BAG family molecular chaperone regulator 4 OS=Homo sapiens GN=BAG4 PE=1 SV=1	0.47	0.47	0.21	0.07	0.07	0.07	0.07
BAG5_HUMAN	BAG family molecular chaperone regulator 5 OS=Homo sapiens GN=BAG5 PE=1 SV=1	0.97	1.1	0.36	0.28	0	0	1.1
BAG6_HUMAN	Large proline-rich protein BAG6 OS=Homo sapiens GN=BAG6 PE=1 SV=2	0.86	0.67	0.42	1.3	0.31	0.38	0.81
BAHC1_HUMAN	BAH and coiled-coil domain-containing protein 1 OS=Homo sapiens GN=BAHCC1 PE=1 SV=3	0	0	0	0.01	0	0	0
BAHD1_HUMAN	Bromo adjacent homology domain-containing 1 protein OS=Homo sapiens GN=BAHD1 PE=1 SV=2	0	0.08	0	0	0	0	0
BAI1_HUMAN	Brain-specific angiogenesis inhibitor 1 OS=Homo sapiens GN=BAI1 PE=1 SV=2	0	0	0	0.02	0.02	0	0
BAI3_HUMAN	Brain-specific angiogenesis inhibitor 3 OS=Homo sapiens GN=BAI3 PE=1 SV=2	0	0	0	0	0	0.02	0
BAIP2_HUMAN	Brain-specific angiogenesis inhibitor 1-associated protein 2 OS=Homo sapiens GN=BAIAP2 PE=1 SV=1	0.87	0.44	0.11	0.17	0.05	0.23	0.37
BAIP3_HUMAN	BAI1-associated protein 3 OS=Homo sapiens GN=BAIAP3 PE=1 SV=2	0	0	0	0.02	0	0	0
BAK_HUMAN	Bcl-2 homologous antagonist/killer OS=Homo sapiens GN=BAK1 PE=1 SV=1	0.94	0.49	0.49	0.7	0.14	0.3	0.3
BANK1_HUMAN	B-cell scaffold protein with ankyrin repeats OS=Homo sapiens GN=BANK1 PE=1 SV=3	0	0	0	0.07	0	0	0
BANP_HUMAN	Protein BANP OS=Homo sapiens GN=BANP PE=1 SV=3	0.32	0.18	0	0	0	0	0.06
BAP18_HUMAN	Chromatin complexes subunit BAP18 OS=Homo sapiens GN=BAP18 PE=1 SV=1	1.81	3.7	0.68	0.41	0	0.19	0.41
BAP1_HUMAN	Ubiquitin carboxyl-terminal hydrolase BAP1 OS=Homo sapiens GN=BAP1 PE=1 SV=2	0.04	0.04	0	0.08	0	0	0.04
BAP29_HUMAN	B-cell receptor-associated protein 29 OS=Homo sapiens GN=BCAP29 PE=1 SV=2	0.12	0.12	0	0	0	0	0
BAP31_HUMAN	B-cell receptor-associated protein 31 OS=Homo sapiens GN=BCAP31 PE=1 SV=3	1.19	0.75	0.4	5.01	0.4	0.12	1.19
BARD1_HUMAN	BRCA1-associated RING domain protein 1 OS=Homo sapiens GN=BARD1 PE=1 SV=2	0.08	0.12	0.04	0.16	0	0.04	0.04
BARX2_HUMAN	Homeobox protein BarH-like 2 OS=Homo sapiens GN=BARX2 PE=1 SV=3	0	0	0	0.11	0	0	0
BASI_HUMAN	Basigin OS=Homo sapiens GN=BSG PE=1 SV=2	2.06	1.45	1.27	1.64	0.57	0.57	2.3
BASP1_HUMAN	Brain acid soluble protein 1 OS=Homo sapiens GN=BASP1 PE=1 SV=2	3.56	1.29	0.74	0.51	0	0	0.74
BATF3_HUMAN	Basic leucine zipper transcriptional factor ATF-like 3 OS=Homo sapiens GN=BATF3 PE=1 SV=1	0.23	0	0	0	0	0	0
BAX_HUMAN	Apoptosis regulator BAX OS=Homo sapiens GN=BAX PE=1 SV=1	2.22	1.41	0.8	1.78	0.55	0.55	1.78
BAZ1A_HUMAN	Bromodomain adjacent to zinc finger domain protein 1A OS=Homo sapiens GN=BAZ1A PE=1 SV=2	0.62	0.36	0.31	0.51	0	0.06	0.31
BAZ1B_HUMAN	Tyrosine-protein kinase BAZ1B OS=Homo sapiens GN=BAZ1B PE=1 SV=2	0.93	1.12	0.48	0.72	0.1	0.12	0.4
BAZ2A_HUMAN	Bromodomain adjacent to zinc finger domain protein 2A OS=Homo sapiens GN=BAZ2A PE=1 SV=4	0.28	0.15	0.11	0.18	0.02	0.03	0.05
BAZ2B_HUMAN	Bromodomain adjacent to zinc finger domain protein 2B OS=Homo sapiens GN=BAZ2B PE=1 SV=3	0	0.03	0.01	0.03	0	0	0
BBS10_HUMAN	Bardet-Biedl syndrome 10 protein OS=Homo sapiens GN=BBS10 PE=1 SV=2	0.04	0	0	0.04	0	0	0
BBS1_HUMAN	Bardet-Biedl syndrome 1 protein OS=Homo sapiens GN=BBS1 PE=1 SV=1	0.05	0.05	0	0	0	0	0.05
BBS2_HUMAN	Bardet-Biedl syndrome 2 protein OS=Homo sapiens GN=BBS2 PE=1 SV=1	0.04	0.04	0	0.04	0	0	0
BBS4_HUMAN	Bardet-Biedl syndrome 4 protein OS=Homo sapiens GN=BBS4 PE=1 SV=2	0	0	0	0.06	0	0	0
BBS5_HUMAN	Bardet-Biedl syndrome 5 protein OS=Homo sapiens GN=BBS5 PE=1 SV=1	0.09	0.09	0	0	0	0	0
BBS7_HUMAN	Bardet-Biedl syndrome 7 protein OS=Homo sapiens GN=BBS7 PE=1 SV=2	0.13	0.13	0	0.08	0	0	0.04
BBX_HUMAN	HMG box transcription factor BBX OS=Homo sapiens GN=BBX PE=1 SV=1	0.24	0.24	0	0	0	0	0.03
BCAM_HUMAN	Basal cell adhesion molecule OS=Homo sapiens GN=BCAM PE=1 SV=2	0.21	0.33	0.15	0	0	0	0.05
BCAR1_HUMAN	Breast cancer anti-estrogen resistance protein 1 OS=Homo sapiens GN=BCAR1 PE=1 SV=2	0.04	0.15	0	0.07	0	0	0.04
BCAS3_HUMAN	Breast carcinoma-amplified sequence 3 OS=Homo sapiens GN=BCAS3 PE=1 SV=3	0.29	0.25	0.13	0.17	0.03	0	0.1
BCAT1_HUMAN	Branched-chain-amino-acid aminotransferase, cytosolic OS=Homo sapiens GN=BCAT1 PE=1 SV=3	0.67	0.67	0.44	0	0.08	0.08	0.08
BCAT2_HUMAN	Branched-chain-amino-acid aminotransferase, mitochondrial OS=Homo sapiens GN=BCAT2 PE=1 SV=2	0.65	0.53	0.33	0.53	0.15	0.15	0.15
BCCIP_HUMAN	BRCA2 and CDKN1A-interacting protein OS=Homo sapiens GN=BCCIP PE=1 SV=1	2.11	1.61	0.55	0.69	0.3	0.3	1.4
BCD1_HUMAN	Box C/D snoRNA protein 1 OS=Homo sapiens GN=ZNHIT6 PE=1 SV=1	0.26	0.42	0.12	0.19	0	0	0.06
BCKD_HUMAN	[3-methyl-2-oxobutanoate dehydrogenase [lipoamide]] kinase, mitochondrial OS=Homo sapiens GN=BCKDK PE=1 SV=2	0.23	0.15	0.15	0	0.07	0.15	0.23
BCL10_HUMAN	B-cell lymphoma/leukemia 10 OS=Homo sapiens GN=BCL10 PE=1 SV=1	0.43	0.61	0	0.43	0	0.13	0.27
BCL2_HUMAN	Apoptosis regulator Bcl-2 OS=Homo sapiens GN=BCL2 PE=1 SV=2	0	0.13	0	0	0	0	0
BCL3_HUMAN	B-cell lymphoma 3 protein OS=Homo sapiens GN=BCL3 PE=1 SV=2	0	0	0.14	0	0.14	0	0.14
BCL7A_HUMAN	B-cell CLL/lymphoma 7 protein family member A OS=Homo sapiens GN=BCL7A PE=1 SV=1	0	0.51	0.15	0	0	0	0
BCL7B_HUMAN	B-cell CLL/lymphoma 7 protein family member B OS=Homo sapiens GN=BCL7B PE=1 SV=1	0	0.52	0	0	0	0	0
BCL7C_HUMAN	B-cell CLL/lymphoma 7 protein family member C OS=Homo sapiens GN=BCL7C PE=1 SV=3	0.49	0.3	0	0.49	0.14	0.14	0.14
BCL9L_HUMAN	B-cell CLL/lymphoma 9-like protein OS=Homo sapiens GN=BCL9L PE=1 SV=1	0	0.02	0	0.02	0	0	0
BCL9_HUMAN	B-cell CLL/lymphoma 9 protein OS=Homo sapiens GN=BCL9 PE=1 SV=4	0.11	0.09	0	0.02	0	0	0
BCLF1_HUMAN	Bcl-2-associated transcription factor 1 OS=Homo sapiens GN=BCLAF1 PE=1 SV=2	0.83	1.01	0.58	0.89	0.2	0.27	0.67
BCORL_HUMAN	BCL-6 corepressor-like protein 1 OS=Homo sapiens GN=BCORL1 PE=1 SV=1	0.04	0.07	0.04	0	0	0.02	0
BCOR_HUMAN	BCL-6 corepressor OS=Homo sapiens GN=BCOR PE=1 SV=1	0.18	0.26	0.09	0.24	0	0.03	0.03
BCR_HUMAN	Breakpoint cluster region protein OS=Homo sapiens GN=BCR PE=1 SV=2	0.17	0.17	0.17	0.17	0.02	0.07	0.09
BCS1_HUMAN	Mitochondrial chaperone BCS1 OS=Homo sapiens GN=BCS1L PE=1 SV=1	1.23	0.95	0.6	0	0.14	0.22	0.6
BD1L1_HUMAN	Biorientation of chromosomes in cell division protein 1-like 1 OS=Homo sapiens GN=BOD1L1 PE=1 SV=2	0.51	0.68	0.17	0.16	0.02	0.01	0.04
BDH2_HUMAN	3-hydroxybutyrate dehydrogenase type 2 OS=Homo sapiens GN=BDH2 PE=1 SV=2	1.01	1.01	0.26	1.84	0.42	0.59	0.42
BDH_HUMAN	D-beta-hydroxybutyrate dehydrogenase, mitochondrial OS=Homo sapiens GN=BDH1 PE=1 SV=3	0	0	0.09	0.09	0	0	0
BDP1_HUMAN	Transcription factor TFIIIB component B'' homolog OS=Homo sapiens GN=BDP1 PE=1 SV=3	0	0.03	0	0	0.01	0	0
BECN1_HUMAN	Beclin-1 OS=Homo sapiens GN=BECN1 PE=1 SV=2	0.28	0.13	0.06	0.06	0	0	0
BEGIN_HUMAN	Brain-enriched guanylate kinase-associated protein OS=Homo sapiens GN=BEGAIN PE=1 SV=1	0	0	0	0.05	0	0	0
BEND3_HUMAN	BEN domain-containing protein 3 OS=Homo sapiens GN=BEND3 PE=1 SV=1	0.22	0.07	0	0.03	0	0	0.03
BEND4_HUMAN	BEN domain-containing protein 4 OS=Homo sapiens GN=BEND4 PE=2 SV=3	0	0.06	0	0	0	0	0
BEND7_HUMAN	BEN domain-containing protein 7 OS=Homo sapiens GN=BEND7 PE=1 SV=2	0	0.12	0	0	0	0	0
BET1L_HUMAN	BET1-like protein OS=Homo sapiens GN=BET1L PE=1 SV=1	1.08	0.63	0.28	0	0	0	0
BET1_HUMAN	BET1 homolog OS=Homo sapiens GN=BET1 PE=1 SV=1	0.25	0	0	0.25	0	0	0
BEX5_HUMAN	Protein BEX5 OS=Homo sapiens GN=BEX5 PE=2 SV=1	0	0	0	0.27	0	0	0
BGAL_HUMAN	Beta-galactosidase OS=Homo sapiens GN=GLB1 PE=1 SV=2	0.88	0.73	0.34	0.59	0.4	0.23	0.8
BGLR_HUMAN	Beta-glucuronidase OS=Homo sapiens GN=GUSB PE=1 SV=2	0.14	0.24	0.14	0.14	0	0	0.09
BHE40_HUMAN	Class E basic helix-loop-helix protein 40 OS=Homo sapiens GN=BHLHE40 PE=1 SV=1	0	0	0	0.07	0	0	0
BHMT1_HUMAN	Betaine--homocysteine S-methyltransferase 1 OS=Homo sapiens GN=BHMT PE=1 SV=2	0.15	0	0	0	0	0	0.07
BHMT2_HUMAN	S-methylmethionine--homocysteine S-methyltransferase BHMT2 OS=Homo sapiens GN=BHMT2 PE=1 SV=1	0.17	0	0.08	0	0.08	0	0
BI1_HUMAN	Bax inhibitor 1 OS=Homo sapiens GN=TMBIM6 PE=1 SV=2	0.12	0.12	0	0	0	0	0
BI2L1_HUMAN	Brain-specific angiogenesis inhibitor 1-associated protein 2-like protein 1 OS=Homo sapiens GN=BAIAP2L1 PE=1 SV=2	0.56	0.75	0.18	0.18	0	0.06	0.18
BICD1_HUMAN	Protein bicaudal D homolog 1 OS=Homo sapiens GN=BICD1 PE=1 SV=3	0.03	0	0	0	0	0	0
BICD2_HUMAN	Protein bicaudal D homolog 2 OS=Homo sapiens GN=BICD2 PE=1 SV=1	0.41	0.67	0.36	0.41	0.07	0.07	0.32
BID_HUMAN	BH3-interacting domain death agonist OS=Homo sapiens GN=BID PE=1 SV=1	1.33	2.55	0.32	1.02	0	0.15	0.52
BIEA_HUMAN	Biliverdin reductase A OS=Homo sapiens GN=BLVRA PE=1 SV=2	1.55	2.08	0.76	2.72	0.93	0.46	0.76
BIG1_HUMAN	Brefeldin A-inhibited guanine nucleotide-exchange protein 1 OS=Homo sapiens GN=ARFGEF1 PE=1 SV=2	0.32	0.4	0.2	0.2	0.03	0.05	0.05
BIG2_HUMAN	Brefeldin A-inhibited guanine nucleotide-exchange protein 2 OS=Homo sapiens GN=ARFGEF2 PE=1 SV=3	0.42	0.33	0.13	0.12	0	0	0.07
BIG3_HUMAN	Brefeldin A-inhibited guanine nucleotide-exchange protein 3 OS=Homo sapiens GN=ARFGEF3 PE=1 SV=3	0	0	0	0.04	0	0	0
BIN1_HUMAN	Myc box-dependent-interacting protein 1 OS=Homo sapiens GN=BIN1 PE=1 SV=1	0.48	0.72	0.28	0.22	0.05	0.1	0.16
BIN2_HUMAN	Bridging integrator 2 OS=Homo sapiens GN=BIN2 PE=1 SV=3	0	0.11	0	0	0	0	0
BIN3_HUMAN	Bridging integrator 3 OS=Homo sapiens GN=BIN3 PE=1 SV=1	0	0	0	0.24	0	0	0.24
BINCA_HUMAN	Bcl10-interacting CARD protein OS=Homo sapiens GN=C9orf89 PE=1 SV=1	0.44	0.27	0	0	0	0	0.13
BIRC1_HUMAN	Baculoviral IAP repeat-containing protein 1 OS=Homo sapiens GN=NAIP PE=1 SV=3	0	0	0	0.04	0.02	0	0.02
BIRC2_HUMAN	Baculoviral IAP repeat-containing protein 2 OS=Homo sapiens GN=BIRC2 PE=1 SV=2	0.2	0.05	0	0.09	0	0	0.09
BIRC5_HUMAN	Baculoviral IAP repeat-containing protein 5 OS=Homo sapiens GN=BIRC5 PE=1 SV=3	1.09	1.09	0.2	0.2	0	0	0
BIRC6_HUMAN	Baculoviral IAP repeat-containing protein 6 OS=Homo sapiens GN=BIRC6 PE=1 SV=2	0.29	0.25	0.12	0.23	0.04	0.02	0.07
BL1S1_HUMAN	Biogenesis of lysosome-related organelles complex 1 subunit 1 OS=Homo sapiens GN=BLOC1S1 PE=1 SV=2	1.04	0.71	0.43	0.71	0	0	0.43
BL1S2_HUMAN	Biogenesis of lysosome-related organelles complex 1 subunit 2 OS=Homo sapiens GN=BLOC1S2 PE=1 SV=1	1.62	3.66	0.47	0.21	0.21	0.21	0.21
BL1S3_HUMAN	Biogenesis of lysosome-related organelles complex 1 subunit 3 OS=Homo sapiens GN=BLOC1S3 PE=1 SV=1	1.78	2.22	0	0.34	0	0.16	1.78
BL1S4_HUMAN	Biogenesis of lysosome-related organelles complex 1 subunit 4 OS=Homo sapiens GN=BLOC1S4 PE=1 SV=1	0.7	1.9	0	0.7	0.14	0.14	0.14
BL1S5_HUMAN	Biogenesis of lysosome-related organelles complex 1 subunit 5 OS=Homo sapiens GN=BLOC1S5 PE=1 SV=1	0.33	0.54	0.33	0.33	0.15	0.15	0.15
BL1S6_HUMAN	Biogenesis of lysosome-related organelles complex 1 subunit 6 OS=Homo sapiens GN=BLOC1S6 PE=1 SV=1	0.17	0.17	0	0	0	0	0
BLMH_HUMAN	Bleomycin hydrolase OS=Homo sapiens GN=BLMH PE=1 SV=1	1.18	0.82	0.52	1.06	0.43	0.35	1.62
BLM_HUMAN	Bloom syndrome protein OS=Homo sapiens GN=BLM PE=1 SV=1	0.3	0.27	0.13	0.2	0.04	0.04	0.06
BLVRB_HUMAN	Flavin reductase (NADPH) OS=Homo sapiens GN=BLVRB PE=1 SV=3	3.08	2.55	2.08	2.55	0.52	0.76	1.33
BMAL1_HUMAN	Aryl hydrocarbon receptor nuclear translocator-like protein 1 OS=Homo sapiens GN=ARNTL PE=1 SV=2	0	0	0	0	0	0	0.05
BMAL2_HUMAN	Aryl hydrocarbon receptor nuclear translocator-like protein 2 OS=Homo sapiens GN=ARNTL2 PE=1 SV=2	0	0	0	0	0	0	0.05
BMI1_HUMAN	Polycomb complex protein BMI-1 OS=Homo sapiens GN=BMI1 PE=1 SV=2	0.29	0	0.18	0	0	0.09	0
BMP2K_HUMAN	BMP-2-inducible protein kinase OS=Homo sapiens GN=BMP2K PE=1 SV=2	0.13	0.08	0	0	0	0	0
BMPR2_HUMAN	Bone morphogenetic protein receptor type-2 OS=Homo sapiens GN=BMPR2 PE=1 SV=2	0	0	0	0.06	0	0	0.06
BMS1_HUMAN	Ribosome biogenesis protein BMS1 homolog OS=Homo sapiens GN=BMS1 PE=1 SV=1	0.74	0.33	0.27	0.66	0.05	0.02	0.33
BMT2_HUMAN	Probable methyltransferase BTM2 homolog OS=Homo sapiens GN=C7orf60 PE=2 SV=1	0.07	0	0	0	0	0	0
BN3D2_HUMAN	Pre-miRNA 5'-monophosphate methyltransferase OS=Homo sapiens GN=BCDIN3D PE=1 SV=1	0	0.21	0	0.21	0	0	0.21
BNC1_HUMAN	Zinc finger protein basonuclin-1 OS=Homo sapiens GN=BNC1 PE=1 SV=2	0	0	0	0.06	0	0	0
BNI3L_HUMAN	BCL2/adenovirus E1B 19 kDa protein-interacting protein 3-like OS=Homo sapiens GN=BNIP3L PE=1 SV=1	0	0.14	0.14	0.14	0	0	0
BNIP2_HUMAN	BCL2/adenovirus E1B 19 kDa protein-interacting protein 2 OS=Homo sapiens GN=BNIP2 PE=1 SV=1	0	0	0	0	0	0	0.09
BNIP3_HUMAN	BCL2/adenovirus E1B 19 kDa protein-interacting protein 3 OS=Homo sapiens GN=BNIP3 PE=1 SV=2	0	0.16	0.16	0	0	0	0
BOD1_HUMAN	Biorientation of chromosomes in cell division protein 1 OS=Homo sapiens GN=BOD1 PE=1 SV=2	0.62	1.24	0.18	0	0	0	0
BOLA1_HUMAN	BolA-like protein 1 OS=Homo sapiens GN=BOLA1 PE=1 SV=1	2.57	1.33	0.24	0.89	0	0	0
BOLA2_HUMAN	BolA-like protein 2 OS=Homo sapiens GN=BOLA2 PE=1 SV=1	12.51	12.51	4.67	4.67	0	0	3.25
BOLA3_HUMAN	BolA-like protein 3 OS=Homo sapiens GN=BOLA3 PE=1 SV=1	0.64	0.64	0	0	0	0	0
BOP1_HUMAN	Ribosome biogenesis protein BOP1 OS=Homo sapiens GN=BOP1 PE=1 SV=2	1.7	1.7	0.77	0.71	0.16	0.21	0.58
BOP_HUMAN	Protein Bop OS=Homo sapiens GN=BOP PE=1 SV=1	0	0	0	0.08	0	0	0
BORA_HUMAN	Protein aurora borealis OS=Homo sapiens GN=BORA PE=1 SV=2	0.05	0.17	0.05	0	0	0	0
BOREA_HUMAN	Borealin OS=Homo sapiens GN=CDCA8 PE=1 SV=2	1.02	0.83	0.22	0.35	0	0.35	0.35
BORG1_HUMAN	Cdc42 effector protein 2 OS=Homo sapiens GN=CDC42EP2 PE=1 SV=1	0	0.15	0	0	0	0	0
BORG4_HUMAN	Cdc42 effector protein 4 OS=Homo sapiens GN=CDC42EP4 PE=1 SV=1	0.65	0.8	0.18	0	0	0	0.09
BORG5_HUMAN	Cdc42 effector protein 1 OS=Homo sapiens GN=CDC42EP1 PE=1 SV=1	0.73	0.6	0.27	0	0	0.08	0.48
BPHL_HUMAN	Valacyclovir hydrolase OS=Homo sapiens GN=BPHL PE=1 SV=1	0.47	0.34	0.1	0.34	0	0	0.21
BPIB3_HUMAN	BPI fold-containing family B member 3 OS=Homo sapiens GN=BPIFB3 PE=2 SV=2	0.07	0.07	0.07	0	0	0	0.07
BPL1_HUMAN	Biotin--protein ligase OS=Homo sapiens GN=HLCS PE=1 SV=1	0.13	0.13	0	0.13	0	0	0
BPNT1_HUMAN	3'(2'),5'-bisphosphate nucleotidase 1 OS=Homo sapiens GN=BPNT1 PE=1 SV=1	4.94	5.53	3.49	3.93	0.76	1.55	1.81
BPTF_HUMAN	Nucleosome-remodeling factor subunit BPTF OS=Homo sapiens GN=BPTF PE=1 SV=3	0.41	0.28	0.11	0.22	0.04	0.04	0.12
BRAC_HUMAN	Brachyury protein OS=Homo sapiens GN=T PE=2 SV=1	0	0.07	0	0	0	0	0
BRAF_HUMAN	Serine/threonine-protein kinase B-raf OS=Homo sapiens GN=BRAF PE=1 SV=4	0.25	0.21	0.16	0	0	0	0
BRAP_HUMAN	BRCA1-associated protein OS=Homo sapiens GN=BRAP PE=1 SV=2	0.75	0.39	0.21	0.26	0	0	0.15
BRAT1_HUMAN	BRCA1-associated ATM activator 1 OS=Homo sapiens GN=BRAT1 PE=1 SV=2	1.05	0.54	0.07	0.43	0.07	0.07	0.2
BRCA1_HUMAN	Breast cancer type 1 susceptibility protein OS=Homo sapiens GN=BRCA1 PE=1 SV=2	0.11	0.15	0.03	0.03	0.02	0	0
BRCA2_HUMAN	Breast cancer type 2 susceptibility protein OS=Homo sapiens GN=BRCA2 PE=1 SV=2	0.02	0.04	0	0.02	0	0	0
BRCC3_HUMAN	Lys-63-specific deubiquitinase BRCC36 OS=Homo sapiens GN=BRCC3 PE=1 SV=2	1.01	1.84	1.01	0.69	0.09	0.19	0.42
BRD1_HUMAN	Bromodomain-containing protein 1 OS=Homo sapiens GN=BRD1 PE=1 SV=1	0.05	0.14	0.03	0.03	0.03	0.05	0.05
BRD2_HUMAN	Bromodomain-containing protein 2 OS=Homo sapiens GN=BRD2 PE=1 SV=2	1.23	0.67	0.55	0.39	0.16	0.16	0.24
BRD3_HUMAN	Bromodomain-containing protein 3 OS=Homo sapiens GN=BRD3 PE=1 SV=1	0.76	0.56	0.22	0.38	0	0.04	0.13
BRD4_HUMAN	Bromodomain-containing protein 4 OS=Homo sapiens GN=BRD4 PE=1 SV=2	0.46	0.37	0.18	0.16	0.09	0.07	0.16
BRD7_HUMAN	Bromodomain-containing protein 7 OS=Homo sapiens GN=BRD7 PE=1 SV=1	0.24	0.35	0.09	0.14	0	0	0.04
BRD8_HUMAN	Bromodomain-containing protein 8 OS=Homo sapiens GN=BRD8 PE=1 SV=2	0.15	0.13	0.07	0.07	0	0.02	0
BRD9_HUMAN	Bromodomain-containing protein 9 OS=Homo sapiens GN=BRD9 PE=1 SV=2	0.05	0.05	0.05	0	0	0	0
BRE1A_HUMAN	E3 ubiquitin-protein ligase BRE1A OS=Homo sapiens GN=RNF20 PE=1 SV=2	1.03	1.2	0.53	0.76	0.06	0.15	0.4
BRE1B_HUMAN	E3 ubiquitin-protein ligase BRE1B OS=Homo sapiens GN=RNF40 PE=1 SV=4	0.91	0.86	0.48	0.71	0.15	0.18	0.57
BRE_HUMAN	BRCA1-A complex subunit BRE OS=Homo sapiens GN=BRE PE=1 SV=2	0.79	0.24	0.16	0.08	0.24	0.16	0.08
BRI3B_HUMAN	BRI3-binding protein OS=Homo sapiens GN=BRI3BP PE=1 SV=1	0.4	0.25	0.4	0.57	0.12	0	0.12
BRI3_HUMAN	Brain protein I3 OS=Homo sapiens GN=BRI3 PE=2 SV=1	0.24	0.54	0	0	0	0	0
BRIT2_HUMAN	Putative uncharacterized protein encoded by BRWD1-IT2 OS=Homo sapiens GN=BRWD1-IT2 PE=5 SV=1	0	0	0	0	0	0	0.21
BRK1_HUMAN	Protein BRICK1 OS=Homo sapiens GN=BRK1 PE=1 SV=1	1.74	1.74	0.4	0.4	0	0	0.96
BRM1L_HUMAN	Breast cancer metastasis-suppressor 1-like protein OS=Homo sapiens GN=BRMS1L PE=1 SV=2	0.09	0.09	0	0	0	0	0
BRMS1_HUMAN	Breast cancer metastasis-suppressor 1 OS=Homo sapiens GN=BRMS1 PE=1 SV=1	0.12	0	0	0.25	0	0	0
BROMI_HUMAN	Protein broad-minded OS=Homo sapiens GN=BROMI PE=2 SV=4	0.05	0	0	0.02	0.02	0	0.05
BROX_HUMAN	BRO1 domain-containing protein BROX OS=Homo sapiens GN=BROX PE=1 SV=1	0.72	0.31	0.23	0.4	0.15	0.23	0.72
BRPF1_HUMAN	Peregrin OS=Homo sapiens GN=BRPF1 PE=1 SV=2	0.1	0.07	0.07	0	0	0	0
BRPF3_HUMAN	Bromodomain and PHD finger-containing protein 3 OS=Homo sapiens GN=BRPF3 PE=1 SV=2	0.05	0.07	0	0	0	0	0
BRSK2_HUMAN	Serine/threonine-protein kinase BRSK2 OS=Homo sapiens GN=BRSK2 PE=1 SV=3	0.17	0.12	0.04	0.12	0	0	0
BRWD1_HUMAN	Bromodomain and WD repeat-containing protein 1 OS=Homo sapiens GN=BRWD1 PE=1 SV=4	0	0.01	0.02	0	0	0	0.01
BRX1_HUMAN	Ribosome biogenesis protein BRX1 homolog OS=Homo sapiens GN=BRIX1 PE=1 SV=2	2.67	2.15	1.32	0.58	0.08	0.26	0.84
BSCL2_HUMAN	Seipin OS=Homo sapiens GN=BSCL2 PE=1 SV=3	0	0	0	0	0	0	0.07
BSDC1_HUMAN	BSD domain-containing protein 1 OS=Homo sapiens GN=BSDC1 PE=1 SV=1	0.6	0.71	0.14	0.14	0	0	0.22
BSN_HUMAN	Protein bassoon OS=Homo sapiens GN=BSN PE=2 SV=4	0	0	0	0.02	0	0	0
BST2_HUMAN	Bone marrow stromal antigen 2 OS=Homo sapiens GN=BST2 PE=1 SV=1	0.36	0	0	0	0	0	0.17
BT1A1_HUMAN	Butyrophilin subfamily 1 member A1 OS=Homo sapiens GN=BTN1A1 PE=1 SV=3	0	0	0	0.06	0	0	0
BT2A1_HUMAN	Butyrophilin subfamily 2 member A1 OS=Homo sapiens GN=BTN2A1 PE=1 SV=3	0.05	0.11	0.05	0.17	0	0	0.05
BT3A3_HUMAN	Butyrophilin subfamily 3 member A3 OS=Homo sapiens GN=BTN3A3 PE=1 SV=1	0	0	0	0.05	0	0	0
BT3L4_HUMAN	Transcription factor BTF3 homolog 4 OS=Homo sapiens GN=BTF3L4 PE=1 SV=1	2.51	1.93	1.93	1.05	0.43	0.2	0.2
BTAF1_HUMAN	TATA-binding protein-associated factor 172 OS=Homo sapiens GN=BTAF1 PE=1 SV=2	0.47	0.38	0.11	0.28	0.08	0.13	0.15
BTBD1_HUMAN	BTB/POZ domain-containing protein 1 OS=Homo sapiens GN=BTBD1 PE=1 SV=1	0.06	0	0.06	0	0	0	0
BTBD2_HUMAN	BTB/POZ domain-containing protein 2 OS=Homo sapiens GN=BTBD2 PE=1 SV=1	0.06	0.06	0	0	0	0	0
BTBDB_HUMAN	Ankyrin repeat and BTB/POZ domain-containing protein BTBD11 OS=Homo sapiens GN=BTBD11 PE=2 SV=3	0.03	0	0	0	0	0	0
BTBDG_HUMAN	BTB/POZ domain-containing protein 16 OS=Homo sapiens GN=BTBD16 PE=2 SV=2	0	0	0	0	0	0	0.06
BTD_HUMAN	Biotinidase OS=Homo sapiens GN=BTD PE=1 SV=2	0.11	0.05	0.05	0.05	0	0	0.05
BTF3_HUMAN	Transcription factor BTF3 OS=Homo sapiens GN=BTF3 PE=1 SV=1	2.55	2.55	1.02	2.55	0.32	0.32	2.08
BTG2_HUMAN	Protein BTG2 OS=Homo sapiens GN=BTG2 PE=1 SV=1	0	0	0.19	0	0	0	0
BTLA_HUMAN	B- and T-lymphocyte attenuator OS=Homo sapiens GN=BTLA PE=1 SV=3	0	0	0.1	0	0	0	0
BUB1B_HUMAN	Mitotic checkpoint serine/threonine-protein kinase BUB1 beta OS=Homo sapiens GN=BUB1B PE=1 SV=3	0.27	0.27	0.08	0.03	0	0	0.05
BUB1_HUMAN	Mitotic checkpoint serine/threonine-protein kinase BUB1 OS=Homo sapiens GN=BUB1 PE=1 SV=1	0.05	0.11	0	0	0	0	0
BUB3_HUMAN	Mitotic checkpoint protein BUB3 OS=Homo sapiens GN=BUB3 PE=1 SV=1	1.75	2.54	1.75	2.26	1.32	0.96	1.53
BUD13_HUMAN	BUD13 homolog OS=Homo sapiens GN=BUD13 PE=1 SV=1	0.38	0.31	0.15	0.05	0	0	0
BUD31_HUMAN	Protein BUD31 homolog OS=Homo sapiens GN=BUD31 PE=1 SV=2	1.41	2.43	0.42	1.02	0	0	0.19
BYST_HUMAN	Bystin OS=Homo sapiens GN=BYSL PE=1 SV=3	1.61	1.3	1.02	1.16	0.57	0.29	1.97
BZW1_HUMAN	Basic leucine zipper and W2 domain-containing protein 1 OS=Homo sapiens GN=BZW1 PE=1 SV=1	1.53	1.53	1.21	0.94	0.81	0.81	2.52
BZW2_HUMAN	Basic leucine zipper and W2 domain-containing protein 2 OS=Homo sapiens GN=BZW2 PE=1 SV=1	1.87	1.36	0.69	0.59	0.49	0.69	1.69
C102A_HUMAN	Coiled-coil domain-containing protein 102A OS=Homo sapiens GN=CCDC102A PE=1 SV=2	0.05	0.23	0	0.05	0	0	0
C109B_HUMAN	Coiled-coil domain-containing protein 109B OS=Homo sapiens GN=CCDC109B PE=2 SV=2	0.08	0	0.18	0.08	0	0	0.18
C10_HUMAN	Protein C10 OS=Homo sapiens GN=C12orf57 PE=1 SV=1	0.98	2.94	0.26	0.98	0	0	0.58
C170B_HUMAN	Centrosomal protein of 170 kDa protein B OS=Homo sapiens GN=CEP170B PE=1 SV=4	0.04	0.14	0	0	0	0	0
C19L1_HUMAN	CWF19-like protein 1 OS=Homo sapiens GN=CWF19L1 PE=1 SV=2	1.84	1.31	0.6	1.56	0.05	0.3	0.78
C19L2_HUMAN	CWF19-like protein 2 OS=Homo sapiens GN=CWF19L2 PE=1 SV=4	0.32	0.17	0.03	0	0	0	0
C1D_HUMAN	Nuclear nucleic acid-binding protein C1D OS=Homo sapiens GN=C1D PE=1 SV=1	0.47	0	0	0	0	0	0
C1GLC_HUMAN	C1GALT1-specific chaperone 1 OS=Homo sapiens GN=C1GALT1C1 PE=1 SV=1	0.09	0.09	0	0.09	0	0	0.19
C1GLT_HUMAN	Glycoprotein-N-acetylgalactosamine 3-beta-galactosyltransferase 1 OS=Homo sapiens GN=C1GALT1 PE=1 SV=1	0.25	0.08	0	0	0	0	0.08
C1QBP_HUMAN	Complement component 1 Q subcomponent-binding protein, mitochondrial OS=Homo sapiens GN=C1QBP PE=1 SV=1	1.99	2.3	1.71	1.99	0.22	0.22	2.3
C1TC_HUMAN	C-1-tetrahydrofolate synthase, cytoplasmic OS=Homo sapiens GN=MTHFD1 PE=1 SV=3	3.4	2.53	2.31	7.53	1.74	1.34	4.15
C1TM_HUMAN	Monofunctional C1-tetrahydrofolate synthase, mitochondrial OS=Homo sapiens GN=MTHFD1L PE=1 SV=1	0.94	0.89	0.48	0.89	0.44	0.48	0.72
C2AIL_HUMAN	CDKN2AIP N-terminal-like protein OS=Homo sapiens GN=CDKN2AIPNL PE=1 SV=1	2.16	1.51	0.26	0.26	0	0	0.26
C2C2L_HUMAN	C2 domain-containing protein 2-like OS=Homo sapiens GN=C2CD2L PE=1 SV=3	0.04	0	0	0	0.04	0	0
C2C4C_HUMAN	C2 calcium-dependent domain-containing protein 4C OS=Homo sapiens GN=C2CD4C PE=1 SV=2	0	0	0	0.15	0	0	0.07
C2CD3_HUMAN	C2 domain-containing protein 3 OS=Homo sapiens GN=C2CD3 PE=1 SV=4	0	0.01	0.01	0	0	0	0
C2CD5_HUMAN	C2 domain-containing protein 5 OS=Homo sapiens GN=C2CD5 PE=1 SV=1	0.33	0.19	0.06	0.15	0	0.03	0.03
C2D1A_HUMAN	Coiled-coil and C2 domain-containing protein 1A OS=Homo sapiens GN=CC2D1A PE=1 SV=1	0.49	0.36	0.24	0.49	0.06	0.17	0.32
C2D1B_HUMAN	Coiled-coil and C2 domain-containing protein 1B OS=Homo sapiens GN=CC2D1B PE=1 SV=1	0.41	0.23	0.23	0.23	0.07	0.11	0.15
C2D2A_HUMAN	Coiled-coil and C2 domain-containing protein 2A OS=Homo sapiens GN=CC2D2A PE=1 SV=3	0	0	0	0.02	0	0	0
C2D4D_HUMAN	C2 calcium-dependent domain-containing protein 4D OS=Homo sapiens GN=C2CD4D PE=2 SV=2	0	0	0	0.09	0	0	0
C43BP_HUMAN	Collagen type IV alpha-3-binding protein OS=Homo sapiens GN=COL4A3BP PE=1 SV=1	0.64	0.43	0.31	0.31	0	0.05	0.14
C4BPA_HUMAN	C4b-binding protein alpha chain OS=Homo sapiens GN=C4BPA PE=1 SV=2	0.05	0	0	0	0	0	0
C560_HUMAN	Succinate dehydrogenase cytochrome b560 subunit, mitochondrial OS=Homo sapiens GN=SDHC PE=1 SV=1	0.64	0.64	0.39	0.39	0	0	0
C56D2_HUMAN	Cytochrome b561 domain-containing protein 2 OS=Homo sapiens GN=CYB561D2 PE=1 SV=1	0.3	0.14	0	0	0	0	0.14
C8AP2_HUMAN	CASP8-associated protein 2 OS=Homo sapiens GN=CASP8AP2 PE=1 SV=1	0.03	0.03	0	0.01	0	0	0
C99L2_HUMAN	CD99 antigen-like protein 2 OS=Homo sapiens GN=CD99L2 PE=1 SV=1	0.25	0.56	0.12	0	0	0	0
CA021_HUMAN	Uncharacterized protein C1orf21 OS=Homo sapiens GN=C1orf21 PE=1 SV=1	0.24	0	0	0	0	0	0
CA043_HUMAN	Uncharacterized protein C1orf43 OS=Homo sapiens GN=C1orf43 PE=2 SV=1	0	0	0	0.12	0	0	0
CA050_HUMAN	Uncharacterized protein C1orf50 OS=Homo sapiens GN=C1orf50 PE=2 SV=2	0.53	0.76	0.15	0.33	0	0	0
CA052_HUMAN	UPF0690 protein C1orf52 OS=Homo sapiens GN=C1orf52 PE=1 SV=1	0.35	1.13	0	0.57	0	0	0.35
CA065_HUMAN	Uncharacterized protein C1orf65 OS=Homo sapiens GN=C1orf65 PE=2 SV=2	0	0	0	0.04	0	0	0
CA087_HUMAN	Uncharacterized protein C1orf87 OS=Homo sapiens GN=C1orf87 PE=2 SV=1	0	0	0	0.05	0	0	0
CA105_HUMAN	Uncharacterized protein C1orf105 OS=Homo sapiens GN=C1orf105 PE=2 SV=1	0.16	0	0	0	0	0	0
CA109_HUMAN	Uncharacterized protein C1orf109 OS=Homo sapiens GN=C1orf109 PE=2 SV=1	0.31	0	0	0.14	0	0	0
CA110_HUMAN	Coiled-coil domain-containing protein C1orf110 OS=Homo sapiens GN=C1orf110 PE=2 SV=2	0	0.2	0	0	0	0	0
CA112_HUMAN	Uncharacterized protein C1orf112 OS=Homo sapiens GN=C1orf112 PE=1 SV=1	0	0.07	0	0	0	0	0
CA122_HUMAN	Uncharacterized protein C1orf122 OS=Homo sapiens GN=C1orf122 PE=2 SV=2	0.69	0.69	0	1.84	0.69	0.3	0.3
CA123_HUMAN	UPF0587 protein C1orf123 OS=Homo sapiens GN=C1orf123 PE=1 SV=1	1.74	0.96	0.66	1.74	0	0	0.66
CA131_HUMAN	Uncharacterized protein C1orf131 OS=Homo sapiens GN=C1orf131 PE=1 SV=3	0.78	0.78	0.21	0.47	0.21	0.33	0.21
CA141_HUMAN	Uncharacterized protein C1orf141 OS=Homo sapiens GN=C1orf141 PE=2 SV=1	0	0	0	0.07	0.07	0	0
CA167_HUMAN	Uncharacterized protein C1orf167 OS=Homo sapiens GN=C1orf167 PE=2 SV=2	0.02	0	0	0	0	0	0
CA173_HUMAN	Uncharacterized protein C1orf173 OS=Homo sapiens GN=C1orf173 PE=2 SV=1	0	0.02	0	0.02	0	0	0
CA174_HUMAN	UPF0688 protein C1orf174 OS=Homo sapiens GN=C1orf174 PE=1 SV=2	0.43	0.27	0	0.13	0	0	0
CA185_HUMAN	Uncharacterized protein C1orf185 OS=Homo sapiens GN=C1orf185 PE=2 SV=1	0	0	0	0.15	0	0	0
CA189_HUMAN	Uncharacterized protein C1orf189 OS=Homo sapiens GN=C1orf189 PE=2 SV=1	0	0	0	0.28	0	0	0
CA191_HUMAN	Putative uncharacterized protein C1orf191 OS=Homo sapiens GN=C1orf191 PE=4 SV=1	0	0	0	0.31	0	0	0
CA192_HUMAN	UPF0740 protein C1orf192 OS=Homo sapiens GN=C1orf192 PE=2 SV=1	0	0	0	0.17	0	0	0
CA198_HUMAN	Uncharacterized protein C1orf198 OS=Homo sapiens GN=C1orf198 PE=1 SV=1	0.42	1.01	0.19	0.19	0	0.09	0
CA216_HUMAN	UPF0500 protein C1orf216 OS=Homo sapiens GN=C1orf216 PE=2 SV=1	0	0.13	0	0	0	0	0
CA226_HUMAN	Uncharacterized protein C1orf226 OS=Homo sapiens GN=C1orf226 PE=1 SV=1	0.11	0	0.11	0	0.11	0	0
CA2D1_HUMAN	Voltage-dependent calcium channel subunit alpha-2/delta-1 OS=Homo sapiens GN=CACNA2D1 PE=1 SV=3	0.03	0.11	0	0	0	0	0
CA2D2_HUMAN	Voltage-dependent calcium channel subunit alpha-2/delta-2 OS=Homo sapiens GN=CACNA2D2 PE=1 SV=2	0.02	0.05	0	0	0	0	0
CAAP1_HUMAN	Caspase activity and apoptosis inhibitor 1 OS=Homo sapiens GN=CAAP1 PE=1 SV=2	0.92	0.92	0.18	0.08	0	0	0.18
CAB39_HUMAN	Calcium-binding protein 39 OS=Homo sapiens GN=CAB39 PE=1 SV=1	1.22	1.05	0.61	1.81	0.49	0.17	0.74
CAB45_HUMAN	45 kDa calcium-binding protein OS=Homo sapiens GN=SDF4 PE=1 SV=1	0.84	1.49	0.58	0.26	0	0.26	0.98
CABIN_HUMAN	Calcineurin-binding protein cabin-1 OS=Homo sapiens GN=CABIN1 PE=1 SV=1	0.1	0	0	0.01	0	0	0
CABL1_HUMAN	CDK5 and ABL1 enzyme substrate 1 OS=Homo sapiens GN=CABLES1 PE=1 SV=2	0.1	0.1	0.05	0.1	0	0.1	0.05
CAC1S_HUMAN	Voltage-dependent L-type calcium channel subunit alpha-1S OS=Homo sapiens GN=CACNA1S PE=1 SV=4	0	0	0	0.02	0	0	0
CACB1_HUMAN	Voltage-dependent L-type calcium channel subunit beta-1 OS=Homo sapiens GN=CACNB1 PE=1 SV=3	0	0.1	0	0	0	0	0
CACB2_HUMAN	Voltage-dependent L-type calcium channel subunit beta-2 OS=Homo sapiens GN=CACNB2 PE=1 SV=3	0.04	0	0	0	0	0	0
CACL1_HUMAN	CDK2-associated and cullin domain-containing protein 1 OS=Homo sapiens GN=CACUL1 PE=1 SV=1	0.17	0.36	0.08	0.17	0	0	0
CACO1_HUMAN	Calcium-binding and coiled-coil domain-containing protein 1 OS=Homo sapiens GN=CALCOCO1 PE=1 SV=2	0.09	0.18	0	0	0	0	0
CACO2_HUMAN	Calcium-binding and coiled-coil domain-containing protein 2 OS=Homo sapiens GN=CALCOCO2 PE=1 SV=1	0.13	0.44	0	0.06	0	0	0.06
CACP_HUMAN	Carnitine O-acetyltransferase OS=Homo sapiens GN=CRAT PE=1 SV=5	0.43	0.31	0.09	0.09	0	0.09	0.2
CAD19_HUMAN	Cadherin-19 OS=Homo sapiens GN=CDH19 PE=2 SV=1	0	0.04	0	0	0	0	0
CAD20_HUMAN	Cadherin-20 OS=Homo sapiens GN=CDH20 PE=2 SV=2	0	0	0	0.04	0	0	0
CAD23_HUMAN	Cadherin-23 OS=Homo sapiens GN=CDH23 PE=1 SV=2	0	0.01	0	0	0	0	0
CADH1_HUMAN	Cadherin-1 OS=Homo sapiens GN=CDH1 PE=1 SV=3	0.03	0	0	0	0	0	0
CADH2_HUMAN	Cadherin-2 OS=Homo sapiens GN=CDH2 PE=1 SV=4	0.34	0.17	0.14	0.17	0.07	0.07	0.07
CADH8_HUMAN	Cadherin-8 OS=Homo sapiens GN=CDH8 PE=1 SV=2	0	0	0.04	0	0.04	0	0.04
CADM1_HUMAN	Cell adhesion molecule 1 OS=Homo sapiens GN=CADM1 PE=1 SV=2	0.58	0.48	0.22	0.58	0.07	0.07	0.22
CADM4_HUMAN	Cell adhesion molecule 4 OS=Homo sapiens GN=CADM4 PE=1 SV=1	0.25	0	0	0.08	0	0	0.08
CAF17_HUMAN	Putative transferase CAF17, mitochondrial OS=Homo sapiens GN=IBA57 PE=1 SV=1	1.28	0.78	0.64	0.93	0.28	0.39	1.92
CAF1A_HUMAN	Chromatin assembly factor 1 subunit A OS=Homo sapiens GN=CHAF1A PE=1 SV=2	0.52	0.47	0.2	0.2	0	0.03	0.2
CAF1B_HUMAN	Chromatin assembly factor 1 subunit B OS=Homo sapiens GN=CHAF1B PE=1 SV=1	1.06	0.86	0.23	0.77	0.11	0.23	0.23
CAH13_HUMAN	Carbonic anhydrase 13 OS=Homo sapiens GN=CA13 PE=1 SV=1	0.24	0	0	0.24	0	0	0.71
CAH2_HUMAN	Carbonic anhydrase 2 OS=Homo sapiens GN=CA2 PE=1 SV=2	5.23	3.05	2.27	10.87	2.64	2.64	4.59
CAH5A_HUMAN	Carbonic anhydrase 5A, mitochondrial OS=Homo sapiens GN=CA5A PE=1 SV=1	0	0	0	0	0	0	0.09
CAH5B_HUMAN	Carbonic anhydrase 5B, mitochondrial OS=Homo sapiens GN=CA5B PE=1 SV=1	0	0	0.09	0	0	0	0
CAH8_HUMAN	Carbonic anhydrase-related protein OS=Homo sapiens GN=CA8 PE=1 SV=3	1.59	2.14	1.14	1.36	0.21	0.21	0.77
CAHD1_HUMAN	VWFA and cache domain-containing protein 1 OS=Homo sapiens GN=CACHD1 PE=2 SV=2	0.09	0.07	0.05	0.02	0	0	0.02
CALD1_HUMAN	Caldesmon OS=Homo sapiens GN=CALD1 PE=1 SV=3	0.46	0.68	0.19	0.36	0.15	0.15	0.23
CALL3_HUMAN	Calmodulin-like protein 3 OS=Homo sapiens GN=CALML3 PE=1 SV=2	0	0.44	0	0	0	0	0
CALL4_HUMAN	Calmodulin-like protein 4 OS=Homo sapiens GN=CALML4 PE=2 SV=3	0	0.15	0	0.15	0	0	0
CALL5_HUMAN	Calmodulin-like protein 5 OS=Homo sapiens GN=CALML5 PE=1 SV=2	0.21	1.63	0	0.79	0	0	0.47
CALM_HUMAN	Calmodulin OS=Homo sapiens GN=CALM1 PE=1 SV=2	7.96	2.59	1.08	7.96	0.2	0.2	4.18
CALR_HUMAN	Calreticulin OS=Homo sapiens GN=CALR PE=1 SV=1	6.26	6.75	4.95	4.22	0.81	0.59	3.57
CALU_HUMAN	Calumenin OS=Homo sapiens GN=CALU PE=1 SV=2	4.06	4.06	1.78	1.35	0.19	0.19	2.92
CALX_HUMAN	Calnexin OS=Homo sapiens GN=CANX PE=1 SV=2	4.47	2.26	2.41	5.61	0.68	0.46	3.12
CALY_HUMAN	Neuron-specific vesicular protein calcyon OS=Homo sapiens GN=CALY PE=1 SV=1	0	0.14	0	0	0	0	0
CAMKV_HUMAN	CaM kinase-like vesicle-associated protein OS=Homo sapiens GN=CAMKV PE=2 SV=2	0.06	0.06	0	0	0	0	0
CAMLG_HUMAN	Calcium signal-modulating cyclophilin ligand OS=Homo sapiens GN=CAMLG PE=1 SV=1	0.21	0.1	0.1	0.21	0	0	0
CAMP1_HUMAN	Calmodulin-regulated spectrin-associated protein 1 OS=Homo sapiens GN=CAMSAP1 PE=1 SV=2	0.16	0.16	0.04	0.06	0	0	0
CAMP2_HUMAN	Calmodulin-regulated spectrin-associated protein 2 OS=Homo sapiens GN=CAMSAP2 PE=1 SV=3	0.14	0.12	0.02	0.04	0	0	0
CAMP3_HUMAN	Calmodulin-regulated spectrin-associated protein 3 OS=Homo sapiens GN=CAMSAP3 PE=1 SV=2	0.21	0.15	0.13	0.18	0.05	0.05	0.07
CAMP_HUMAN	Cathelicidin antimicrobial peptide OS=Homo sapiens GN=CAMP PE=1 SV=1	0	0	0	0	0.17	0	0
CAN15_HUMAN	Calpain-15 OS=Homo sapiens GN=SOLH PE=1 SV=1	0.06	0.03	0	0	0	0	0
CAN1_HUMAN	Calpain-1 catalytic subunit OS=Homo sapiens GN=CAPN1 PE=1 SV=1	1.45	1.1	0.48	1.36	0.26	0.31	0.87
CAN2_HUMAN	Calpain-2 catalytic subunit OS=Homo sapiens GN=CAPN2 PE=1 SV=6	1.22	1.22	0.32	0.82	0.08	0.04	0.61
CAN6_HUMAN	Calpain-6 OS=Homo sapiens GN=CAPN6 PE=1 SV=2	0	0	0	0.09	0	0	0
CAN7_HUMAN	Calpain-7 OS=Homo sapiens GN=CAPN7 PE=1 SV=1	0.15	0.07	0	0.23	0.04	0.11	0.07
CAN9_HUMAN	Calpain-9 OS=Homo sapiens GN=CAPN9 PE=1 SV=1	0	0	0	0.04	0	0	0
CANB1_HUMAN	Calcineurin subunit B type 1 OS=Homo sapiens GN=PPP3R1 PE=1 SV=2	0.9	0.62	0.17	0	0	0	0
CAND1_HUMAN	Cullin-associated NEDD8-dissociated protein 1 OS=Homo sapiens GN=CAND1 PE=1 SV=2	2.08	2.46	1.55	2.71	0.88	0.84	1.93
CAND2_HUMAN	Cullin-associated NEDD8-dissociated protein 2 OS=Homo sapiens GN=CAND2 PE=1 SV=3	0.53	0.6	0.18	0.33	0.07	0.07	0.27
CANT1_HUMAN	Soluble calcium-activated nucleotidase 1 OS=Homo sapiens GN=CANT1 PE=1 SV=1	0.15	0.15	0	0	0	0.07	0
CAP1_HUMAN	Adenylyl cyclase-associated protein 1 OS=Homo sapiens GN=CAP1 PE=1 SV=5	3.08	2.84	2.39	5.25	0.84	0.96	3.9
CAP2_HUMAN	Adenylyl cyclase-associated protein 2 OS=Homo sapiens GN=CAP2 PE=1 SV=1	0.52	0.72	0.27	0.13	0	0.27	0.35
CAPG_HUMAN	Macrophage-capping protein OS=Homo sapiens GN=CAPG PE=1 SV=2	0.09	0.18	0.18	0	0	0	0
CAPON_HUMAN	Carboxyl-terminal PDZ ligand of neuronal nitric oxide synthase protein OS=Homo sapiens GN=NOS1AP PE=1 SV=3	0.12	0.33	0	0.12	0	0	0
CAPR1_HUMAN	Caprin-1 OS=Homo sapiens GN=CAPRIN1 PE=1 SV=2	1.01	0.7	0.23	0.77	0.23	0.23	0.51
CAPR2_HUMAN	Caprin-2 OS=Homo sapiens GN=CAPRIN2 PE=2 SV=1	0	0	0	0.03	0	0	0
CAPS1_HUMAN	Calcium-dependent secretion activator 1 OS=Homo sapiens GN=CADPS PE=1 SV=3	0	0	0	0.02	0.02	0	0
CAPS2_HUMAN	Calcium-dependent secretion activator 2 OS=Homo sapiens GN=CADPS2 PE=1 SV=2	0	0	0	0.02	0	0	0.02
CAPZB_HUMAN	F-actin-capping protein subunit beta OS=Homo sapiens GN=CAPZB PE=1 SV=4	2.32	5.67	1.22	5.67	0.65	0.82	8
CAR14_HUMAN	Caspase recruitment domain-containing protein 14 OS=Homo sapiens GN=CARD14 PE=1 SV=2	0.03	0	0.03	0	0	0	0
CARD8_HUMAN	Caspase recruitment domain-containing protein 8 OS=Homo sapiens GN=CARD8 PE=1 SV=1	0.07	0.07	0	0	0	0	0
CARF_HUMAN	CDKN2A-interacting protein OS=Homo sapiens GN=CDKN2AIP PE=1 SV=3	1.18	0.52	0.23	0.6	0.11	0.3	0.37
CARM1_HUMAN	Histone-arginine methyltransferase CARM1 OS=Homo sapiens GN=CARM1 PE=1 SV=3	0.97	0.87	0.47	1.27	0.4	0.4	0.87
CASC3_HUMAN	Protein CASC3 OS=Homo sapiens GN=CASC3 PE=1 SV=2	0.23	0.18	0.04	0	0	0	0
CASC4_HUMAN	Protein CASC4 OS=Homo sapiens GN=CASC4 PE=1 SV=1	0.3	0.07	0.07	0.14	0	0	0
CASC5_HUMAN	Protein CASC5 OS=Homo sapiens GN=CASC5 PE=1 SV=3	0.05	0.06	0	0.02	0	0	0
CASP2_HUMAN	Caspase-2 OS=Homo sapiens GN=CASP2 PE=1 SV=2	0.64	0.74	0.36	0.28	0.06	0.06	0.36
CASP3_HUMAN	Caspase-3 OS=Homo sapiens GN=CASP3 PE=1 SV=2	0.81	0.99	0.22	0.64	0.22	0.22	1.2
CASP6_HUMAN	Caspase-6 OS=Homo sapiens GN=CASP6 PE=1 SV=2	0.75	0.75	0.21	0.45	0	0.1	0.45
CASP7_HUMAN	Caspase-7 OS=Homo sapiens GN=CASP7 PE=1 SV=1	0.73	0.73	0.1	0.44	0	0.1	0.1
CASP8_HUMAN	Caspase-8 OS=Homo sapiens GN=CASP8 PE=1 SV=1	0.33	0.41	0.19	0	0	0.06	0.12
CASPA_HUMAN	Caspase-10 OS=Homo sapiens GN=CASP10 PE=1 SV=3	0.06	0.11	0	0	0	0	0.06
CASPE_HUMAN	Caspase-14 OS=Homo sapiens GN=CASP14 PE=1 SV=2	0	0.4	0	0.12	0	0.12	0.12
CASP_HUMAN	Protein CASP OS=Homo sapiens GN=CUX1 PE=1 SV=2	0.45	0.64	0.34	0.09	0.09	0.04	0.04
CATA_HUMAN	Catalase OS=Homo sapiens GN=CAT PE=1 SV=3	2.07	2.07	0.62	1.35	0.8	0.71	1.35
CATB_HUMAN	Cathepsin B OS=Homo sapiens GN=CTSB PE=1 SV=3	1.09	1.46	0.51	0.64	0	0	1.67
CATC_HUMAN	Dipeptidyl peptidase 1 OS=Homo sapiens GN=CTSC PE=1 SV=2	0.63	0.63	0.35	0.13	0.06	0.06	0.13
CATD_HUMAN	Cathepsin D OS=Homo sapiens GN=CTSD PE=1 SV=1	1.89	2.57	0.89	3.11	0.76	0.76	4.08
CATH_HUMAN	Pro-cathepsin H OS=Homo sapiens GN=CTSH PE=1 SV=4	0.28	0.18	0.09	0.28	0	0	0
CATIN_HUMAN	Cactin OS=Homo sapiens GN=CACTIN PE=1 SV=3	0.24	0.11	0.04	0	0	0	0.04
CATL1_HUMAN	Cathepsin L1 OS=Homo sapiens GN=CTSL1 PE=1 SV=2	0.18	0.18	0	0	0	0	0
CATL2_HUMAN	Cathepsin L2 OS=Homo sapiens GN=CTSL2 PE=1 SV=2	0	0.09	0	0	0	0	0
CAV1_HUMAN	Caveolin-1 OS=Homo sapiens GN=CAV1 PE=1 SV=4	0	0	0	0.16	0	0	0
CAZA1_HUMAN	F-actin-capping protein subunit alpha-1 OS=Homo sapiens GN=CAPZA1 PE=1 SV=3	4.08	4.08	1.6	5.77	0.33	0.61	2.47
CAZA2_HUMAN	F-actin-capping protein subunit alpha-2 OS=Homo sapiens GN=CAPZA2 PE=1 SV=3	2.45	2.8	1.36	2.8	0.21	0.33	1.59
CB042_HUMAN	Uncharacterized protein C2orf42 OS=Homo sapiens GN=C2orf42 PE=2 SV=1	0	0	0	0.05	0.05	0	0
CB043_HUMAN	UPF0554 protein C2orf43 OS=Homo sapiens GN=C2orf43 PE=1 SV=1	0.09	0.18	0.09	0.29	0.18	0.09	0.09
CB044_HUMAN	WD repeat-containing protein C2orf44 OS=Homo sapiens GN=C2orf44 PE=1 SV=1	0.32	0.08	0.04	0.08	0.04	0	0.04
CB047_HUMAN	Uncharacterized protein C2orf47, mitochondrial OS=Homo sapiens GN=C2orf47 PE=1 SV=1	0.33	0.78	0.33	0.78	0	0	0.33
CB062_HUMAN	Uncharacterized protein C2orf62 OS=Homo sapiens GN=C2orf62 PE=2 SV=1	0.07	0	0	0	0	0	0
CB069_HUMAN	UPF0565 protein C2orf69 OS=Homo sapiens GN=C2orf69 PE=1 SV=1	0.16	0.16	0	0	0	0	0
CB072_HUMAN	Uncharacterized protein C2orf72 OS=Homo sapiens GN=C2orf72 PE=2 SV=2	0	0.36	0	0	0	0	0
CB076_HUMAN	UPF0538 protein C2orf76 OS=Homo sapiens GN=C2orf76 PE=1 SV=3	0.23	0.52	0	0.23	0	0	0
CBLN4_HUMAN	Cerebellin-4 OS=Homo sapiens GN=CBLN4 PE=1 SV=1	0	0.33	0	0	0	0	0
CBL_HUMAN	E3 ubiquitin-protein ligase CBL OS=Homo sapiens GN=CBL PE=1 SV=2	0.42	0.29	0.17	0.25	0.07	0.14	0.25
CBPC1_HUMAN	Cytosolic carboxypeptidase 1 OS=Homo sapiens GN=AGTPBP1 PE=1 SV=3	0.15	0.15	0.07	0.15	0.02	0.02	0.05
CBPC6_HUMAN	Cytosolic carboxypeptidase 6 OS=Homo sapiens GN=AGBL4 PE=2 SV=3	0	0	0	0.11	0	0	0
CBPD_HUMAN	Carboxypeptidase D OS=Homo sapiens GN=CPD PE=1 SV=2	0.73	0.59	0.37	0.4	0.18	0.21	0.43
CBPE_HUMAN	Carboxypeptidase E OS=Homo sapiens GN=CPE PE=1 SV=1	0.06	0	0	0	0	0	0
CBPQ_HUMAN	Carboxypeptidase Q OS=Homo sapiens GN=CPQ PE=1 SV=1	0.06	0	0	0	0	0	0
CBP_HUMAN	CREB-binding protein OS=Homo sapiens GN=CREBBP PE=1 SV=3	0.17	0.09	0.08	0.14	0.01	0	0.01
CBR1_HUMAN	Carbonyl reductase [NADPH] 1 OS=Homo sapiens GN=CBR1 PE=1 SV=3	6.85	8.65	3.69	15.15	1.8	2.44	10.86
CBR3_HUMAN	Carbonyl reductase [NADPH] 3 OS=Homo sapiens GN=CBR3 PE=1 SV=3	1.25	1.49	0	0	0	0.66	0
CBR4_HUMAN	Carbonyl reductase family member 4 OS=Homo sapiens GN=CBR4 PE=1 SV=3	0.64	0.13	0.13	0.28	0.28	0.13	0.13
CBS_HUMAN	Cystathionine beta-synthase OS=Homo sapiens GN=CBS PE=1 SV=2	1.44	1.44	0.69	2.51	0.52	0.78	1.85
CBWD1_HUMAN	COBW domain-containing protein 1 OS=Homo sapiens GN=CBWD1 PE=1 SV=1	0.54	0	0	0	0	0.15	1.37
CBWD2_HUMAN	COBW domain-containing protein 2 OS=Homo sapiens GN=CBWD2 PE=1 SV=1	0	0.65	0.07	0.24	0.07	0	1.54
CBX1_HUMAN	Chromobox protein homolog 1 OS=Homo sapiens GN=CBX1 PE=1 SV=1	3.92	6.59	1.76	5.57	0.34	0.16	0.54
CBX2_HUMAN	Chromobox protein homolog 2 OS=Homo sapiens GN=CBX2 PE=1 SV=2	0.67	0.19	0	0.06	0.06	0.06	0
CBX3_HUMAN	Chromobox protein homolog 3 OS=Homo sapiens GN=CBX3 PE=1 SV=4	4.12	5.89	3.41	6.99	1.1	0.81	3.41
CBX4_HUMAN	E3 SUMO-protein ligase CBX4 OS=Homo sapiens GN=CBX4 PE=1 SV=3	0.44	0.05	0.17	0	0	0.11	0
CBX5_HUMAN	Chromobox protein homolog 5 OS=Homo sapiens GN=CBX5 PE=1 SV=1	2.5	5.12	1.31	1.01	0.32	0.32	0.52
CBX6_HUMAN	Chromobox protein homolog 6 OS=Homo sapiens GN=CBX6 PE=1 SV=1	0.34	0	0	0	0	0	0.07
CBX7_HUMAN	Chromobox protein homolog 7 OS=Homo sapiens GN=CBX7 PE=1 SV=1	0	0.12	0	0	0	0	0
CBX8_HUMAN	Chromobox protein homolog 8 OS=Homo sapiens GN=CBX8 PE=1 SV=3	0.8	0.8	0.67	0	0.08	0.25	0.34
CBY1_HUMAN	Protein chibby homolog 1 OS=Homo sapiens GN=CBY1 PE=1 SV=1	0	0.24	0	0	0	0	0
CC017_HUMAN	Uncharacterized protein C3orf17 OS=Homo sapiens GN=C3orf17 PE=1 SV=3	0.48	0.28	0.1	0.16	0	0.1	0.16
CC030_HUMAN	Uncharacterized protein C3orf30 OS=Homo sapiens GN=C3orf30 PE=2 SV=2	0	0	0	0.05	0	0	0
CC033_HUMAN	Uncharacterized protein C3orf33 OS=Homo sapiens GN=C3orf33 PE=1 SV=2	0.21	0	0.21	0.32	0	0	0.45
CC037_HUMAN	UPF0361 protein C3orf37 OS=Homo sapiens GN=C3orf37 PE=1 SV=1	0.86	0.72	0.26	0.26	0	0.08	0.08
CC038_HUMAN	Uncharacterized protein C3orf38 OS=Homo sapiens GN=C3orf38 PE=2 SV=1	0.18	0.18	0	0.09	0	0	0
CC053_HUMAN	Putative uncharacterized protein C3orf53 OS=Homo sapiens GN=C3orf53 PE=5 SV=1	0	0	0	0.15	0	0	0
CC062_HUMAN	Uncharacterized protein C3orf62 OS=Homo sapiens GN=C3orf62 PE=2 SV=1	0	0.11	0	0.11	0	0	0
CC104_HUMAN	Coiled-coil domain-containing protein 104 OS=Homo sapiens GN=CCDC104 PE=1 SV=2	0.38	0.75	0.27	0	0	0	0.27
CC106_HUMAN	Coiled-coil domain-containing protein 106 OS=Homo sapiens GN=CCDC106 PE=1 SV=1	0	0.1	0	0	0	0	0
CC111_HUMAN	Coiled-coil domain-containing protein 111 OS=Homo sapiens GN=CCDC111 PE=1 SV=2	0	0	0	0.05	0	0	0
CC112_HUMAN	Coiled-coil domain-containing protein 112 OS=Homo sapiens GN=CCDC112 PE=2 SV=2	0	0.06	0	0	0	0	0
CC115_HUMAN	Coiled-coil domain-containing protein 115 OS=Homo sapiens GN=CCDC115 PE=1 SV=1	0.17	0.37	0.17	0.17	0	0	0
CC116_HUMAN	Coiled-coil domain-containing protein 116 OS=Homo sapiens GN=CCDC116 PE=2 SV=2	0	0.06	0.06	0	0	0	0
CC117_HUMAN	Coiled-coil domain-containing protein 117 OS=Homo sapiens GN=CCDC117 PE=2 SV=1	0.36	0.51	0.23	0	0	0	0
CC120_HUMAN	Coiled-coil domain-containing protein 120 OS=Homo sapiens GN=CCDC120 PE=1 SV=1	0	0	0	0.05	0	0	0
CC124_HUMAN	Coiled-coil domain-containing protein 124 OS=Homo sapiens GN=CCDC124 PE=1 SV=1	5.18	3.29	1.64	1.34	0	0.27	3.85
CC125_HUMAN	Coiled-coil domain-containing protein 125 OS=Homo sapiens GN=CCDC125 PE=1 SV=2	0.06	0.11	0.06	0.06	0	0	0.06
CC126_HUMAN	Coiled-coil domain-containing protein 126 OS=Homo sapiens GN=CCDC126 PE=2 SV=2	0	0.22	0	0.22	0	0	0
CC127_HUMAN	Coiled-coil domain-containing protein 127 OS=Homo sapiens GN=CCDC127 PE=1 SV=1	0.11	0.23	0.11	0.23	0	0	0.23
CC130_HUMAN	Coiled-coil domain-containing protein 130 OS=Homo sapiens GN=CCDC130 PE=1 SV=2	0	0	0.07	0	0	0	0
CC132_HUMAN	Coiled-coil domain-containing protein 132 OS=Homo sapiens GN=CCDC132 PE=1 SV=3	0.45	0.5	0.19	0.12	0	0.06	0.06
CC134_HUMAN	Coiled-coil domain-containing protein 134 OS=Homo sapiens GN=CCDC134 PE=1 SV=1	1.57	0.6	0.27	1.28	0.27	0.6	0.8
CC137_HUMAN	Coiled-coil domain-containing protein 137 OS=Homo sapiens GN=CCDC137 PE=1 SV=1	0.46	0.77	0.77	0.46	0.1	0.21	0.1
CC138_HUMAN	Coiled-coil domain-containing protein 138 OS=Homo sapiens GN=CCDC138 PE=1 SV=1	0	0	0	0	0.09	0	0
CC141_HUMAN	Coiled-coil domain-containing protein 141 OS=Homo sapiens GN=CCDC141 PE=1 SV=1	0	0	0	0.07	0.03	0	0.03
CC151_HUMAN	Coiled-coil domain-containing protein 151 OS=Homo sapiens GN=CCDC151 PE=2 SV=1	0.1	0	0	0	0	0	0.1
CC159_HUMAN	Coiled-coil domain-containing protein 159 OS=Homo sapiens GN=CCDC159 PE=2 SV=1	0	0	0	0.07	0	0	0
CC167_HUMAN	Coiled-coil domain-containing protein 167 OS=Homo sapiens GN=CCDC167 PE=1 SV=2	0.3	0	0	0.3	0	0	0
CC170_HUMAN	Coiled-coil domain-containing protein 170 OS=Homo sapiens GN=CCDC170 PE=2 SV=3	0	0	0	0.08	0	0	0.04
CC171_HUMAN	Coiled-coil domain-containing protein 171 OS=Homo sapiens GN=CCDC171 PE=2 SV=1	0	0.04	0	0.04	0	0	0
CC174_HUMAN	Coiled-coil domain-containing protein 174 OS=Homo sapiens GN=CCDC174 PE=2 SV=3	0.13	0.27	0.06	0	0	0	0.06
CC175_HUMAN	Coiled-coil domain-containing protein 175 OS=Homo sapiens GN=CCDC175 PE=2 SV=1	0	0	0	0	0	0	0.03
CC180_HUMAN	Coiled-coil domain-containing protein 180 OS=Homo sapiens GN=CCDC180 PE=2 SV=2	0.03	0.05	0.05	0.05	0	0	0
CC181_HUMAN	Coiled-coil domain-containing protein 181 OS=Homo sapiens GN=CCDC181 PE=2 SV=1	0.11	0	0	0	0	0	0.11
CC28A_HUMAN	Coiled-coil domain-containing protein 28A OS=Homo sapiens GN=CCDC28A PE=2 SV=1	0	0.11	0	0.11	0	0	0
CC28B_HUMAN	Coiled-coil domain-containing protein 28B OS=Homo sapiens GN=CCDC28B PE=1 SV=2	0	0	0	0.15	0	0	0
CC42B_HUMAN	Coiled-coil domain-containing protein 42B OS=Homo sapiens GN=CCDC42B PE=2 SV=3	0	0	0	0.09	0	0	0
CC50A_HUMAN	Cell cycle control protein 50A OS=Homo sapiens GN=TMEM30A PE=1 SV=1	0.59	0.59	0.26	0.17	0.17	0.17	0.17
CC71L_HUMAN	Coiled-coil domain-containing protein 71L OS=Homo sapiens GN=CCDC71L PE=2 SV=2	0.13	0.13	0.13	0.27	0.13	0.13	0.27
CC85A_HUMAN	Coiled-coil domain-containing protein 85A OS=Homo sapiens GN=CCDC85A PE=2 SV=3	0	0	0	0.11	0	0	0
CC85B_HUMAN	Coiled-coil domain-containing protein 85B OS=Homo sapiens GN=CCDC85B PE=1 SV=2	0.15	0.32	0	0	0	0	0
CC85C_HUMAN	Coiled-coil domain-containing protein 85C OS=Homo sapiens GN=CCDC85C PE=1 SV=1	0.52	0.88	0.32	0.07	0	0	0.15
CC88B_HUMAN	Coiled-coil domain-containing protein 88B OS=Homo sapiens GN=CCDC88B PE=1 SV=1	0	0.02	0	0.02	0	0	0
CC90B_HUMAN	Coiled-coil domain-containing protein 90B, mitochondrial OS=Homo sapiens GN=CCDC90B PE=1 SV=2	0.38	0.24	0.11	0.53	0	0	0
CCAR1_HUMAN	Cell division cycle and apoptosis regulator protein 1 OS=Homo sapiens GN=CCAR1 PE=1 SV=2	0.55	0.47	0.18	0.44	0.08	0.1	0.37
CCD11_HUMAN	Coiled-coil domain-containing protein 11 OS=Homo sapiens GN=CCDC11 PE=1 SV=2	0	0.05	0	0	0	0	0
CCD12_HUMAN	Coiled-coil domain-containing protein 12 OS=Homo sapiens GN=CCDC12 PE=1 SV=1	2.1	3.28	1.24	1.24	0	0	0
CCD14_HUMAN	Coiled-coil domain-containing protein 14 OS=Homo sapiens GN=CCDC14 PE=1 SV=3	0.09	0	0	0.03	0	0	0
CCD18_HUMAN	Coiled-coil domain-containing protein 18 OS=Homo sapiens GN=CCDC18 PE=2 SV=1	0.06	0.04	0	0	0.02	0	0
CCD19_HUMAN	Coiled-coil domain-containing protein 19, mitochondrial OS=Homo sapiens GN=CCDC19 PE=2 SV=2	0	0	0	0.05	0	0	0
CCD22_HUMAN	Coiled-coil domain-containing protein 22 OS=Homo sapiens GN=CCDC22 PE=1 SV=1	1.16	0.88	0.57	1.47	0.09	0.37	0.5
CCD23_HUMAN	Coiled-coil domain-containing protein 23 OS=Homo sapiens GN=CCDC23 PE=2 SV=1	0.45	0	0	0	0	0	0
CCD25_HUMAN	Coiled-coil domain-containing protein 25 OS=Homo sapiens GN=CCDC25 PE=1 SV=2	1.15	1.15	0.29	0.66	0	0.29	0
CCD30_HUMAN	Coiled-coil domain-containing protein 30 OS=Homo sapiens GN=CCDC30 PE=2 SV=1	0	0	0	0.04	0	0	0
CCD36_HUMAN	Coiled-coil domain-containing protein 36 OS=Homo sapiens GN=CCDC36 PE=2 SV=2	0	0	0	0	0	0	0.05
CCD37_HUMAN	Coiled-coil domain-containing protein 37 OS=Homo sapiens GN=CCDC37 PE=2 SV=1	0	0	0	0.05	0	0	0
CCD39_HUMAN	Coiled-coil domain-containing protein 39 OS=Homo sapiens GN=CCDC39 PE=2 SV=3	0	0.03	0	0	0	0	0
CCD43_HUMAN	Coiled-coil domain-containing protein 43 OS=Homo sapiens GN=CCDC43 PE=1 SV=2	2.45	3.43	0.86	1.38	0.13	0.13	2.45
CCD47_HUMAN	Coiled-coil domain-containing protein 47 OS=Homo sapiens GN=CCDC47 PE=1 SV=1	1.49	1.49	1.22	1.35	0.19	0.33	1.49
CCD50_HUMAN	Coiled-coil domain-containing protein 50 OS=Homo sapiens GN=CCDC50 PE=1 SV=1	0.42	0.55	0.3	0.09	0	0	0
CCD51_HUMAN	Coiled-coil domain-containing protein 51 OS=Homo sapiens GN=CCDC51 PE=1 SV=2	1.29	1	0.74	0	0.15	0.23	0.32
CCD53_HUMAN	WASH complex subunit CCDC53 OS=Homo sapiens GN=CCDC53 PE=1 SV=1	0.55	0.34	0	0.8	0.16	0.16	2.24
CCD57_HUMAN	Coiled-coil domain-containing protein 57 OS=Homo sapiens GN=CCDC57 PE=2 SV=2	0	0	0	0.06	0	0	0
CCD58_HUMAN	Coiled-coil domain-containing protein 58 OS=Homo sapiens GN=CCDC58 PE=1 SV=1	1.99	1.99	1.99	0.73	0	0	1.08
CCD62_HUMAN	Coiled-coil domain-containing protein 62 OS=Homo sapiens GN=CCDC62 PE=1 SV=2	0	0.04	0	0.04	0	0	0
CCD63_HUMAN	Coiled-coil domain-containing protein 63 OS=Homo sapiens GN=CCDC63 PE=2 SV=1	0	0	0.05	0	0	0	0
CCD65_HUMAN	Coiled-coil domain-containing protein 65 OS=Homo sapiens GN=CCDC65 PE=1 SV=2	0	0	0	0.12	0	0	0.12
CCD70_HUMAN	Coiled-coil domain-containing protein 70 OS=Homo sapiens GN=CCDC70 PE=2 SV=1	0.12	0	0	0	0	0	0
CCD71_HUMAN	Coiled-coil domain-containing protein 71 OS=Homo sapiens GN=CCDC71 PE=2 SV=3	0.07	0.07	0	0.07	0	0	0.07
CCD79_HUMAN	Coiled-coil domain-containing protein 79 OS=Homo sapiens GN=CCDC79 PE=2 SV=3	0	0	0	0.04	0	0	0
CCD82_HUMAN	Coiled-coil domain-containing protein 82 OS=Homo sapiens GN=CCDC82 PE=1 SV=2	0.05	0.05	0	0	0	0	0
CCD83_HUMAN	Coiled-coil domain-containing protein 83 OS=Homo sapiens GN=CCDC83 PE=2 SV=2	0	0	0	0.07	0	0	0
CCD84_HUMAN	Coiled-coil domain-containing protein 84 OS=Homo sapiens GN=CCDC84 PE=2 SV=1	0	0	0	0.09	0	0	0.09
CCD86_HUMAN	Coiled-coil domain-containing protein 86 OS=Homo sapiens GN=CCDC86 PE=1 SV=1	1.38	1.58	0.48	0.74	0	0.27	0.48
CCD91_HUMAN	Coiled-coil domain-containing protein 91 OS=Homo sapiens GN=CCDC91 PE=1 SV=2	0	0.37	0	0	0.07	0	0.07
CCD92_HUMAN	Coiled-coil domain-containing protein 92 OS=Homo sapiens GN=CCDC92 PE=1 SV=2	0.09	0.09	0.09	0	0	0	0
CCD93_HUMAN	Coiled-coil domain-containing protein 93 OS=Homo sapiens GN=CCDC93 PE=1 SV=2	0.36	0.76	0.09	0.69	0	0.04	0.14
CCD94_HUMAN	Coiled-coil domain-containing protein 94 OS=Homo sapiens GN=CCDC94 PE=1 SV=1	0.98	0.29	0.29	0	0	0	0.19
CCD97_HUMAN	Coiled-coil domain-containing protein 97 OS=Homo sapiens GN=CCDC97 PE=1 SV=1	1.07	0.91	0.5	0.08	0	0.08	0.27
CCDB1_HUMAN	Cyclin-D1-binding protein 1 OS=Homo sapiens GN=CCNDBP1 PE=1 SV=2	0	0	0	0	0	0	0.08
CCDC6_HUMAN	Coiled-coil domain-containing protein 6 OS=Homo sapiens GN=CCDC6 PE=1 SV=2	1.18	0.71	0.71	0.43	0.27	0.2	0.82
CCDC8_HUMAN	Coiled-coil domain-containing protein 8 OS=Homo sapiens GN=CCDC8 PE=1 SV=2	0.06	0.24	0.06	0.11	0	0	0.06
CCDC9_HUMAN	Coiled-coil domain-containing protein 9 OS=Homo sapiens GN=CCDC9 PE=1 SV=1	0.24	0.31	0.05	0	0	0	0
CCG2_HUMAN	Voltage-dependent calcium channel gamma-2 subunit OS=Homo sapiens GN=CACNG2 PE=1 SV=1	0	0	0	0.09	0	0	0
CCG6_HUMAN	Voltage-dependent calcium channel gamma-6 subunit OS=Homo sapiens GN=CACNG6 PE=2 SV=1	0.12	0	0	0	0	0	0
CCGL_HUMAN	Voltage-dependent calcium channel gamma-like subunit OS=Homo sapiens GN=TMEM37 PE=2 SV=2	0	0	0	0	0	0	0.16
CCHCR_HUMAN	Coiled-coil alpha-helical rod protein 1 OS=Homo sapiens GN=CCHCR1 PE=2 SV=2	0	0.04	0	0	0	0	0
CCHL_HUMAN	Cytochrome c-type heme lyase OS=Homo sapiens GN=HCCS PE=1 SV=1	1.26	1.04	0.36	1.04	0	0	0.23
CCL13_HUMAN	C-C motif chemokine 13 OS=Homo sapiens GN=CCL13 PE=1 SV=1	0	0	0.31	0	0	0	0
CCL20_HUMAN	C-C motif chemokine 20 OS=Homo sapiens GN=CCL20 PE=1 SV=1	0	0	0	0.31	0	0	0
CCL25_HUMAN	C-C motif chemokine 25 OS=Homo sapiens GN=CCL25 PE=1 SV=2	0	0	0.2	0	0	0	0
CCL26_HUMAN	C-C motif chemokine 26 OS=Homo sapiens GN=CCL26 PE=1 SV=1	0.32	0	0	0	0	0	0
CCL28_HUMAN	C-C motif chemokine 28 OS=Homo sapiens GN=CCL28 PE=1 SV=1	0	0	0	0.23	0	0	0
CCM2_HUMAN	Malcavernin OS=Homo sapiens GN=CCM2 PE=1 SV=1	0	0.07	0	0	0	0	0
CCNA1_HUMAN	Cyclin-A1 OS=Homo sapiens GN=CCNA1 PE=1 SV=1	0	0	0	0.06	0	0	0
CCNA2_HUMAN	Cyclin-A2 OS=Homo sapiens GN=CCNA2 PE=1 SV=2	0.69	0.39	0.22	0.14	0.14	0.07	0.39
CCNB1_HUMAN	G2/mitotic-specific cyclin-B1 OS=Homo sapiens GN=CCNB1 PE=1 SV=1	0.39	0.48	0.07	0.48	0.14	0.14	0.58
CCNB2_HUMAN	G2/mitotic-specific cyclin-B2 OS=Homo sapiens GN=CCNB2 PE=1 SV=1	0.23	0.32	0.07	0.23	0.07	0.07	0.75
CCNC_HUMAN	Cyclin-C OS=Homo sapiens GN=CCNC PE=1 SV=2	0.33	0.33	0.33	0.46	0	0	0.6
CCNE1_HUMAN	G1/S-specific cyclin-E1 OS=Homo sapiens GN=CCNE1 PE=1 SV=2	0.14	0.14	0	0	0	0	0
CCNE2_HUMAN	G1/S-specific cyclin-E2 OS=Homo sapiens GN=CCNE2 PE=1 SV=1	0	0.14	0	0	0	0	0
CCNH_HUMAN	Cyclin-H OS=Homo sapiens GN=CCNH PE=1 SV=1	0.4	0.4	0.18	0.28	0	0.09	0.09
CCNK_HUMAN	Cyclin-K OS=Homo sapiens GN=CCNK PE=1 SV=2	0.64	0.64	0.16	0.35	0.05	0.05	0.22
CCNL1_HUMAN	Cyclin-L1 OS=Homo sapiens GN=CCNL1 PE=1 SV=1	0.05	0.05	0	0.17	0	0.05	0.11
CCNL2_HUMAN	Cyclin-L2 OS=Homo sapiens GN=CCNL2 PE=1 SV=1	0.06	0.12	0	0.12	0	0	0
CCNT1_HUMAN	Cyclin-T1 OS=Homo sapiens GN=CCNT1 PE=1 SV=1	0.22	0.08	0.17	0.43	0	0	0.08
CCNT2_HUMAN	Cyclin-T2 OS=Homo sapiens GN=CCNT2 PE=1 SV=2	0.17	0.08	0	0	0	0.04	0
CCNY_HUMAN	Cyclin-Y OS=Homo sapiens GN=CCNY PE=1 SV=2	0.17	0	0	0	0	0	0
CCR2_HUMAN	C-C chemokine receptor type 2 OS=Homo sapiens GN=CCR2 PE=1 SV=1	0.08	0.08	0	0	0	0	0
CCSE2_HUMAN	Serine-rich coiled-coil domain-containing protein 2 OS=Homo sapiens GN=CCSER2 PE=2 SV=2	0	0.03	0	0	0	0	0
CCS_HUMAN	Copper chaperone for superoxide dismutase OS=Homo sapiens GN=CCS PE=1 SV=1	0.71	0.53	0.24	0.53	0.11	0.24	0.71
CCYL1_HUMAN	Cyclin-Y-like protein 1 OS=Homo sapiens GN=CCNYL1 PE=1 SV=2	0.26	0.36	0	0	0	0.08	0.17
CCZ1B_HUMAN	Vacuolar fusion protein CCZ1 homolog B OS=Homo sapiens GN=CCZ1B PE=1 SV=1	0.41	0.67	0.12	0.26	0.12	0.06	0.19
CD003_HUMAN	Uncharacterized protein C4orf3 OS=Homo sapiens GN=C4orf3 PE=4 SV=2	0.47	0	0	0	0	0	0
CD027_HUMAN	UPF0609 protein C4orf27 OS=Homo sapiens GN=C4orf27 PE=1 SV=2	0.89	1.4	0.61	0.49	0.38	0.38	0.38
CD029_HUMAN	Uncharacterized protein C4orf29 OS=Homo sapiens GN=C4orf29 PE=2 SV=1	0	0	0	0	0.14	0	0.14
CD11B_HUMAN	Cyclin-dependent kinase 11B OS=Homo sapiens GN=CDK11B PE=1 SV=3	0.93	0.8	0.52	0.46	0.15	0.11	0.27
CD123_HUMAN	Cell division cycle protein 123 homolog OS=Homo sapiens GN=CDC123 PE=1 SV=1	1.62	1.62	0.49	0.08	0.08	0.08	0.62
CD151_HUMAN	CD151 antigen OS=Homo sapiens GN=CD151 PE=1 SV=3	0.11	0	0	0	0	0	0
CD158_HUMAN	Coiled-coil domain-containing protein 158 OS=Homo sapiens GN=CCDC158 PE=1 SV=2	0.03	0.08	0	0.03	0.05	0	0
CD166_HUMAN	CD166 antigen OS=Homo sapiens GN=ALCAM PE=1 SV=2	0.55	0.63	0.1	0.41	0.05	0.1	0.05
CD209_HUMAN	CD209 antigen OS=Homo sapiens GN=CD209 PE=1 SV=1	0	0	0	0	0	0	0.07
CD20B_HUMAN	Cell division cycle protein 20 homolog B OS=Homo sapiens GN=CDC20B PE=2 SV=3	0	0	0	0.06	0	0	0
CD22_HUMAN	B-cell receptor CD22 OS=Homo sapiens GN=CD22 PE=1 SV=2	0.03	0	0	0	0	0	0
CD276_HUMAN	CD276 antigen OS=Homo sapiens GN=CD276 PE=1 SV=1	0.64	0.39	0.12	0.18	0.06	0.06	0.12
CD2A1_HUMAN	Cyclin-dependent kinase inhibitor 2A, isoforms 1/2/3 OS=Homo sapiens GN=CDKN2A PE=1 SV=2	2.06	3.44	1.54	4.35	0.2	0.45	2.68
CD2AP_HUMAN	CD2-associated protein OS=Homo sapiens GN=CD2AP PE=1 SV=1	1.05	1.93	0.37	0.64	0.05	0.2	0.5
CD2B2_HUMAN	CD2 antigen cytoplasmic tail-binding protein 2 OS=Homo sapiens GN=CD2BP2 PE=1 SV=1	0.96	0.8	0.8	0.4	0.18	0.09	0.96
CD302_HUMAN	CD302 antigen OS=Homo sapiens GN=CD302 PE=1 SV=1	0.27	0.43	0	0	0	0	0
CD320_HUMAN	CD320 antigen OS=Homo sapiens GN=CD320 PE=1 SV=1	0.37	0.11	0	0	0	0	0
CD37L_HUMAN	Hsp90 co-chaperone Cdc37-like 1 OS=Homo sapiens GN=CDC37L1 PE=1 SV=1	0	0.08	0	0	0	0	0
CD47_HUMAN	Leukocyte surface antigen CD47 OS=Homo sapiens GN=CD47 PE=1 SV=1	0.31	0.31	0.19	0.19	0.09	0.09	0.31
CD59_HUMAN	CD59 glycoprotein OS=Homo sapiens GN=CD59 PE=1 SV=1	1.29	0.51	0	0.23	0	0	0.23
CD63_HUMAN	CD63 antigen OS=Homo sapiens GN=CD63 PE=1 SV=2	0.13	0.27	0	0.13	0.13	0.43	0.13
CD68_HUMAN	Macrosialin OS=Homo sapiens GN=CD68 PE=1 SV=2	0	0	0	0.09	0	0	0
CD81_HUMAN	CD81 antigen OS=Homo sapiens GN=CD81 PE=1 SV=1	0.81	1.29	0.43	0.81	0	0	0.27
CD97_HUMAN	CD97 antigen OS=Homo sapiens GN=CD97 PE=1 SV=4	0.03	0.11	0.03	0	0	0	0
CD99_HUMAN	CD99 antigen OS=Homo sapiens GN=CD99 PE=1 SV=1	0	0	0	0.39	0	0	0.18
CD9_HUMAN	CD9 antigen OS=Homo sapiens GN=CD9 PE=1 SV=4	0.44	0.27	0.27	0.44	0	0	0
CDA7L_HUMAN	Cell division cycle-associated 7-like protein OS=Homo sapiens GN=CDCA7L PE=1 SV=2	0	0.13	0	0	0	0	0
CDAC1_HUMAN	Cytidine and dCMP deaminase domain-containing protein 1 OS=Homo sapiens GN=CDADC1 PE=2 SV=1	0	0	0	0	0.06	0	0
CDAN1_HUMAN	Codanin-1 OS=Homo sapiens GN=CDAN1 PE=1 SV=4	0.21	0.05	0.02	0.07	0	0	0.05
CDC16_HUMAN	Cell division cycle protein 16 homolog OS=Homo sapiens GN=CDC16 PE=1 SV=2	0.56	0.43	0.19	0.43	0.05	0.05	0.14
CDC20_HUMAN	Cell division cycle protein 20 homolog OS=Homo sapiens GN=CDC20 PE=1 SV=2	0.12	0.12	0.06	0.06	0	0	0.06
CDC23_HUMAN	Cell division cycle protein 23 homolog OS=Homo sapiens GN=CDC23 PE=1 SV=3	1	1	0.32	0.74	0	0.15	0.82
CDC26_HUMAN	Anaphase-promoting complex subunit CDC26 OS=Homo sapiens GN=CDC26 PE=1 SV=1	0.36	0.84	0	0	0	0	0
CDC27_HUMAN	Cell division cycle protein 27 homolog OS=Homo sapiens GN=CDC27 PE=1 SV=2	0.8	0.74	0.52	0.46	0.07	0.19	0.41
CDC37_HUMAN	Hsp90 co-chaperone Cdc37 OS=Homo sapiens GN=CDC37 PE=1 SV=1	1.03	1.34	0.89	0.64	0.15	0.43	1.9
CDC42_HUMAN	Cell division control protein 42 homolog OS=Homo sapiens GN=CDC42 PE=1 SV=2	1.38	2.68	1.38	1.76	0.16	0.16	0.34
CDC45_HUMAN	Cell division control protein 45 homolog OS=Homo sapiens GN=CDC45 PE=1 SV=1	0.62	0.4	0.21	0.4	0.05	0.21	0.21
CDC5L_HUMAN	Cell division cycle 5-like protein OS=Homo sapiens GN=CDC5L PE=1 SV=2	1.65	2.15	1.31	3.32	0.32	0.32	1.15
CDC6_HUMAN	Cell division control protein 6 homolog OS=Homo sapiens GN=CDC6 PE=1 SV=1	0.11	0.11	0	0	0	0	0
CDC73_HUMAN	Parafibromin OS=Homo sapiens GN=CDC73 PE=1 SV=1	1.46	1.33	0.79	1.59	0.37	0.37	1.59
CDC7_HUMAN	Cell division cycle 7-related protein kinase OS=Homo sapiens GN=CDC7 PE=1 SV=1	0.22	0.28	0.16	0.22	0.05	0	0.05
CDCA2_HUMAN	Cell division cycle-associated protein 2 OS=Homo sapiens GN=CDCA2 PE=1 SV=2	0.06	0.12	0	0	0	0	0
CDCA3_HUMAN	Cell division cycle-associated protein 3 OS=Homo sapiens GN=CDCA3 PE=1 SV=1	0.72	0.11	0	0	0	0	0
CDCA4_HUMAN	Cell division cycle-associated protein 4 OS=Homo sapiens GN=CDCA4 PE=2 SV=1	0	0	0	0	0	0	0.27
CDCA5_HUMAN	Sororin OS=Homo sapiens GN=CDCA5 PE=1 SV=1	0.97	0.41	0.25	1.21	0.12	0.25	0.25
CDIPT_HUMAN	CDP-diacylglycerol--inositol 3-phosphatidyltransferase OS=Homo sapiens GN=CDIPT PE=1 SV=1	0.3	0.3	0	0.93	0	0	0.3
CDK10_HUMAN	Cyclin-dependent kinase 10 OS=Homo sapiens GN=CDK10 PE=1 SV=1	0	0.17	0	0.17	0	0	0
CDK12_HUMAN	Cyclin-dependent kinase 12 OS=Homo sapiens GN=CDK12 PE=1 SV=2	0.34	0.4	0.06	0.22	0.04	0.06	0.08
CDK13_HUMAN	Cyclin-dependent kinase 13 OS=Homo sapiens GN=CDK13 PE=1 SV=2	0.1	0.22	0.08	0.12	0	0	0.08
CDK16_HUMAN	Cyclin-dependent kinase 16 OS=Homo sapiens GN=CDK16 PE=1 SV=1	0.58	0.67	0.19	0.26	0	0.26	0.33
CDK17_HUMAN	Cyclin-dependent kinase 17 OS=Homo sapiens GN=CDK17 PE=1 SV=2	0.24	0.31	0.11	0	0	0	0
CDK18_HUMAN	Cyclin-dependent kinase 18 OS=Homo sapiens GN=CDK18 PE=1 SV=3	0.26	0.26	0.19	0	0	0	0.19
CDK19_HUMAN	Cyclin-dependent kinase 19 OS=Homo sapiens GN=CDK19 PE=1 SV=1	0	0.12	0	0	0	0	0
CDK1_HUMAN	Cyclin-dependent kinase 1 OS=Homo sapiens GN=CDK1 PE=1 SV=3	4.84	3.42	1.78	16.81	1.78	2.35	27.35
CDK20_HUMAN	Cyclin-dependent kinase 20 OS=Homo sapiens GN=CDK20 PE=1 SV=1	0.18	0	0	0.18	0.18	0	0
CDK2_HUMAN	Cyclin-dependent kinase 2 OS=Homo sapiens GN=CDK2 PE=1 SV=2	5.41	2.05	1.78	4.84	0.92	1.1	4.84
CDK3_HUMAN	Cyclin-dependent kinase 3 OS=Homo sapiens GN=CDK3 PE=1 SV=1	0	0.72	0	0	0	0	0
CDK4_HUMAN	Cyclin-dependent kinase 4 OS=Homo sapiens GN=CDK4 PE=1 SV=2	3.44	2.06	1.11	4.35	0.45	0.75	6.08
CDK5_HUMAN	Cyclin-dependent kinase 5 OS=Homo sapiens GN=CDK5 PE=1 SV=3	0.93	1.12	1.12	3.08	0.6	0.93	2.72
CDK6_HUMAN	Cyclin-dependent kinase 6 OS=Homo sapiens GN=CDK6 PE=1 SV=1	1.15	1.34	0.81	1.78	0.29	0.29	0.53
CDK7_HUMAN	Cyclin-dependent kinase 7 OS=Homo sapiens GN=CDK7 PE=1 SV=1	0.38	0.18	0.18	0.27	0.08	0.18	0.08
CDK8_HUMAN	Cyclin-dependent kinase 8 OS=Homo sapiens GN=CDK8 PE=1 SV=1	0.06	0	0	0.06	0	0	0
CDK9_HUMAN	Cyclin-dependent kinase 9 OS=Homo sapiens GN=CDK9 PE=1 SV=3	1.25	1.09	0.56	1.25	0.25	0.34	0.56
CDKA1_HUMAN	Cyclin-dependent kinase 2-associated protein 1 OS=Homo sapiens GN=CDK2AP1 PE=1 SV=1	0.28	1.08	0	0.28	0	0	0.28
CDKAL_HUMAN	Threonylcarbamoyladenosine tRNA methylthiotransferase OS=Homo sapiens GN=CDKAL1 PE=1 SV=1	0.55	0.63	0.22	0.22	0.16	0.1	0.34
CDKL1_HUMAN	Cyclin-dependent kinase-like 1 OS=Homo sapiens GN=CDKL1 PE=1 SV=5	0.16	0	0	0	0	0	0
CDKL5_HUMAN	Cyclin-dependent kinase-like 5 OS=Homo sapiens GN=CDKL5 PE=1 SV=1	0	0	0	0.03	0	0	0
CDN1A_HUMAN	Cyclin-dependent kinase inhibitor 1 OS=Homo sapiens GN=CDKN1A PE=1 SV=3	0	0.18	0	0	0	0	0
CDN2C_HUMAN	Cyclin-dependent kinase 4 inhibitor C OS=Homo sapiens GN=CDKN2C PE=1 SV=1	0.19	0.67	0	0	0	0	0
CDPF1_HUMAN	Cysteine-rich DPF motif domain-containing protein 1 OS=Homo sapiens GN=CDPF1 PE=2 SV=1	0	0.24	0	0.24	0	0	0
CDR2L_HUMAN	Cerebellar degeneration-related protein 2-like OS=Homo sapiens GN=CDR2L PE=2 SV=2	0	0.06	0	0	0	0	0
CDR2_HUMAN	Cerebellar degeneration-related protein 2 OS=Homo sapiens GN=CDR2 PE=1 SV=2	0.06	0.13	0	0	0	0	0
CDRT4_HUMAN	CMT1A duplicated region transcript 4 protein OS=Homo sapiens GN=CDRT4 PE=2 SV=2	0	0	0	0.19	0.19	0	0
CDS2_HUMAN	Phosphatidate cytidylyltransferase 2 OS=Homo sapiens GN=CDS2 PE=1 SV=1	0.2	0.2	0.06	0.06	0	0	0.06
CDSN_HUMAN	Corneodesmosin OS=Homo sapiens GN=CDSN PE=1 SV=3	0	0	0	0.06	0	0	0.06
CDT1_HUMAN	DNA replication factor Cdt1 OS=Homo sapiens GN=CDT1 PE=1 SV=3	0.11	0.05	0	0.05	0.05	0.05	0
CDV3_HUMAN	Protein CDV3 homolog OS=Homo sapiens GN=CDV3 PE=1 SV=1	2.55	2.55	2.16	2.16	0.59	0.78	3.47
CDY1_HUMAN	Testis-specific chromodomain protein Y 1 OS=Homo sapiens GN=CDY1 PE=1 SV=1	0	0.11	0	0	0	0	0
CDYL1_HUMAN	Chromodomain Y-like protein OS=Homo sapiens GN=CDYL PE=1 SV=2	0.21	0.15	0.05	0.1	0	0	0.15
CE022_HUMAN	UPF0489 protein C5orf22 OS=Homo sapiens GN=C5orf22 PE=1 SV=2	0.46	0.37	0.21	0.13	0	0	0.21
CE024_HUMAN	UPF0461 protein C5orf24 OS=Homo sapiens GN=C5orf24 PE=1 SV=1	0.58	0.85	0.58	0.36	0	0.17	0.36
CE028_HUMAN	Transmembrane protein C5orf28 OS=Homo sapiens GN=C5orf28 PE=2 SV=1	0.14	0	0	0.14	0	0	0
CE030_HUMAN	UNC119-binding protein C5orf30 OS=Homo sapiens GN=C5orf30 PE=1 SV=1	0.14	0	0	0	0	0	0
CE042_HUMAN	Uncharacterized protein C5orf42 OS=Homo sapiens GN=C5orf42 PE=1 SV=4	0	0	0.01	0	0	0	0
CE045_HUMAN	UPF0544 protein C5orf45 OS=Homo sapiens GN=C5orf45 PE=2 SV=2	0.18	0.09	0	0	0	0	0
CE050_HUMAN	Uncharacterized protein C5orf50 OS=Homo sapiens GN=C5orf50 PE=2 SV=2	0	0	0	0	0.18	0	0
CE051_HUMAN	UPF0600 protein C5orf51 OS=Homo sapiens GN=C5orf51 PE=1 SV=1	1.77	0.91	0.2	0.91	0.1	0.1	0
CE112_HUMAN	Centrosomal protein of 112 kDa OS=Homo sapiens GN=CEP112 PE=1 SV=2	0.03	0.12	0	0	0	0	0
CE120_HUMAN	Centrosomal protein of 120 kDa OS=Homo sapiens GN=CEP120 PE=2 SV=2	0.03	0.03	0	0	0	0	0
CE128_HUMAN	Centrosomal protein of 128 kDa OS=Homo sapiens GN=CEP128 PE=1 SV=2	0.08	0.16	0	0.03	0	0	0.03
CE152_HUMAN	Centrosomal protein of 152 kDa OS=Homo sapiens GN=CEP152 PE=1 SV=4	0	0.02	0	0	0	0	0
CE162_HUMAN	Centrosomal protein of 162 kDa OS=Homo sapiens GN=KIAA1009 PE=1 SV=2	0	0	0	0.02	0	0	0.04
CE164_HUMAN	Centrosomal protein of 164 kDa OS=Homo sapiens GN=CEP164 PE=1 SV=3	0.02	0	0	0.04	0	0	0
CE170_HUMAN	Centrosomal protein of 170 kDa OS=Homo sapiens GN=CEP170 PE=1 SV=1	0.94	0.8	0.39	0.37	0.1	0.08	0.2
CE192_HUMAN	Centrosomal protein of 192 kDa OS=Homo sapiens GN=CEP192 PE=1 SV=2	0.05	0.03	0.03	0	0	0	0
CE290_HUMAN	Centrosomal protein of 290 kDa OS=Homo sapiens GN=CEP290 PE=1 SV=2	0.09	0.12	0.01	0.06	0.02	0	0
CE350_HUMAN	Centrosome-associated protein 350 OS=Homo sapiens GN=CEP350 PE=1 SV=1	0.08	0.17	0	0	0	0	0
CEAM1_HUMAN	Carcinoembryonic antigen-related cell adhesion molecule 1 OS=Homo sapiens GN=CEACAM1 PE=1 SV=2	0	0.12	0	0	0	0	0
CEAM3_HUMAN	Carcinoembryonic antigen-related cell adhesion molecule 3 OS=Homo sapiens GN=CEACAM3 PE=1 SV=2	0	0	0	0.12	0	0	0
CEBPA_HUMAN	CCAAT/enhancer-binding protein alpha OS=Homo sapiens GN=CEBPA PE=1 SV=3	0	0.09	0	0	0	0	0
CEBPB_HUMAN	CCAAT/enhancer-binding protein beta OS=Homo sapiens GN=CEBPB PE=1 SV=2	0.19	0	0.09	0.09	0	0	0
CEBPE_HUMAN	CCAAT/enhancer-binding protein epsilon OS=Homo sapiens GN=CEBPE PE=1 SV=2	0	0.11	0	0	0	0	0
CEBPG_HUMAN	CCAAT/enhancer-binding protein gamma OS=Homo sapiens GN=CEBPG PE=1 SV=1	0.21	0	0	0	0	0	0
CEBPZ_HUMAN	CCAAT/enhancer-binding protein zeta OS=Homo sapiens GN=CEBPZ PE=1 SV=3	1.05	0.84	0.75	0.84	0.11	0.3	0.75
CECR2_HUMAN	Cat eye syndrome critical region protein 2 OS=Homo sapiens GN=CECR2 PE=1 SV=2	0.04	0.02	0.02	0.02	0	0	0
CECR5_HUMAN	Cat eye syndrome critical region protein 5 OS=Homo sapiens GN=CECR5 PE=1 SV=1	1.12	0.73	0.31	1.12	0.15	0.51	0.23
CEGT_HUMAN	Ceramide glucosyltransferase OS=Homo sapiens GN=UGCG PE=1 SV=1	0.07	0	0	0	0	0	0
CELF1_HUMAN	CUGBP Elav-like family member 1 OS=Homo sapiens GN=CELF1 PE=1 SV=2	0.44	0.63	0.2	0.84	0.06	0.13	1.08
CELR2_HUMAN	Cadherin EGF LAG seven-pass G-type receptor 2 OS=Homo sapiens GN=CELSR2 PE=1 SV=1	0	0.01	0	0.01	0	0	0
CENPA_HUMAN	Histone H3-like centromeric protein A OS=Homo sapiens GN=CENPA PE=1 SV=1	0.47	0	0	0	0	0	0
CENPB_HUMAN	Major centromere autoantigen B OS=Homo sapiens GN=CENPB PE=1 SV=2	0.34	0.16	0.1	0.28	0.1	0.05	0.16
CENPC_HUMAN	Centromere protein C 1 OS=Homo sapiens GN=CENPC1 PE=1 SV=2	0.23	0.09	0.2	0.09	0	0	0
CENPE_HUMAN	Centromere-associated protein E OS=Homo sapiens GN=CENPE PE=1 SV=2	0.1	0.06	0.02	0.07	0	0	0.03
CENPF_HUMAN	Centromere protein F OS=Homo sapiens GN=CENPF PE=1 SV=2	0.36	0.53	0.07	0.11	0.02	0.02	0.04
CENPH_HUMAN	Centromere protein H OS=Homo sapiens GN=CENPH PE=1 SV=1	0.94	0.74	0.74	0.25	0	0	0.56
CENPI_HUMAN	Centromere protein I OS=Homo sapiens GN=CENPI PE=1 SV=2	0.12	0.08	0.04	0	0	0	0.04
CENPJ_HUMAN	Centromere protein J OS=Homo sapiens GN=CENPJ PE=1 SV=2	0.02	0	0	0.02	0	0	0
CENPK_HUMAN	Centromere protein K OS=Homo sapiens GN=CENPK PE=1 SV=1	0.22	0.22	0	0.22	0	0	0
CENPL_HUMAN	Centromere protein L OS=Homo sapiens GN=CENPL PE=1 SV=2	0.08	0	0	0	0	0	0.08
CENPM_HUMAN	Centromere protein M OS=Homo sapiens GN=CENPM PE=1 SV=1	0.86	1.18	0.59	0.17	0	0.17	0.37
CENPN_HUMAN	Centromere protein N OS=Homo sapiens GN=CENPN PE=1 SV=2	0.08	0	0	0	0	0	0
CENPO_HUMAN	Centromere protein O OS=Homo sapiens GN=CENPO PE=1 SV=1	0.2	0.2	0	0.1	0	0	0
CENPP_HUMAN	Centromere protein P OS=Homo sapiens GN=CENPP PE=1 SV=1	0	0.1	0.21	0	0	0	0.46
CENPQ_HUMAN	Centromere protein Q OS=Homo sapiens GN=CENPQ PE=1 SV=1	0.23	0.36	0.11	0.51	0	0	1.28
CENPR_HUMAN	Centromere protein R OS=Homo sapiens GN=ITGB3BP PE=1 SV=2	0.36	0.36	0	0	0	0	0
CENPS_HUMAN	Centromere protein S OS=Homo sapiens GN=APITD1 PE=1 SV=1	0.21	0.47	0.21	0	0	0	0
CENPT_HUMAN	Centromere protein T OS=Homo sapiens GN=CENPT PE=1 SV=2	0	0.05	0.05	0	0	0	0
CENPU_HUMAN	Centromere protein U OS=Homo sapiens GN=MLF1IP PE=1 SV=1	0.22	0.31	0.14	0	0	0.14	0.14
CENPV_HUMAN	Centromere protein V OS=Homo sapiens GN=CENPV PE=1 SV=1	2.47	0.86	0.51	2.13	0.37	0.37	0.37
CENPX_HUMAN	Centromere protein X OS=Homo sapiens GN=STRA13 PE=1 SV=1	0.39	0	0	0.39	0	0	0
CEP19_HUMAN	Centrosomal protein of 19 kDa OS=Homo sapiens GN=CEP19 PE=1 SV=2	0	0.17	0	0	0	0	0
CEP41_HUMAN	Centrosomal protein of 41 kDa OS=Homo sapiens GN=CEP41 PE=1 SV=1	0.36	0.36	0.17	0.17	0	0	0.71
CEP44_HUMAN	Centrosomal protein of 44 kDa OS=Homo sapiens GN=CEP44 PE=1 SV=2	0.43	0.33	0.07	0	0	0	0.15
CEP55_HUMAN	Centrosomal protein of 55 kDa OS=Homo sapiens GN=CEP55 PE=1 SV=3	0.42	0.6	0.12	0	0	0.06	0.12
CEP57_HUMAN	Centrosomal protein of 57 kDa OS=Homo sapiens GN=CEP57 PE=1 SV=2	0.12	0	0	0	0	0	0
CEP68_HUMAN	Centrosomal protein of 68 kDa OS=Homo sapiens GN=CEP68 PE=1 SV=2	0.08	0	0	0	0	0	0
CEP76_HUMAN	Centrosomal protein of 76 kDa OS=Homo sapiens GN=CEP76 PE=1 SV=1	0.09	0.04	0	0	0	0	0
CEP78_HUMAN	Centrosomal protein of 78 kDa OS=Homo sapiens GN=CEP78 PE=1 SV=1	0.28	0.13	0.09	0.18	0	0.09	0.04
CEP83_HUMAN	Centrosomal protein of 83 kDa OS=Homo sapiens GN=CCDC41 PE=1 SV=2	0.08	0.04	0	0	0	0	0
CEP85_HUMAN	Centrosomal protein of 85 kDa OS=Homo sapiens GN=CEP85 PE=1 SV=1	0.4	0.4	0.12	0.08	0	0	0.04
CEP97_HUMAN	Centrosomal protein of 97 kDa OS=Homo sapiens GN=CEP97 PE=1 SV=1	0.44	0.59	0.14	0.18	0.07	0.07	0.1
CEPT1_HUMAN	Choline/ethanolaminephosphotransferase 1 OS=Homo sapiens GN=CEPT1 PE=1 SV=1	0.14	0.14	0.14	0.14	0.07	0.07	0.07
CERS1_HUMAN	Ceramide synthase 1 OS=Homo sapiens GN=CERS1 PE=2 SV=1	0.17	0.27	0.08	0	0	0.08	0.27
CERS2_HUMAN	Ceramide synthase 2 OS=Homo sapiens GN=CERS2 PE=1 SV=1	0.24	0.24	0.24	0.53	0	0.07	0.07
CERS6_HUMAN	Ceramide synthase 6 OS=Homo sapiens GN=CERS6 PE=1 SV=1	0.23	0	0.15	0	0	0	0.07
CETN2_HUMAN	Centrin-2 OS=Homo sapiens GN=CETN2 PE=1 SV=1	0.6	2.01	0.17	0	0	0	0
CETN3_HUMAN	Centrin-3 OS=Homo sapiens GN=CETN3 PE=2 SV=2	0.17	0.89	0.37	0	0	0	0.17
CF010_HUMAN	Uncharacterized protein C6orf10 OS=Homo sapiens GN=C6orf10 PE=2 SV=3	0	0.05	0	0	0	0	0
CF047_HUMAN	Uncharacterized protein C6orf47 OS=Homo sapiens GN=C6orf47 PE=2 SV=2	0	0	0.1	0	0	0	0
CF057_HUMAN	UPF0369 protein C6orf57 OS=Homo sapiens GN=C6orf57 PE=2 SV=1	0.28	0.28	0	0	0	0	0
CF106_HUMAN	Uncharacterized protein C6orf106 OS=Homo sapiens GN=C6orf106 PE=1 SV=2	0	0.1	0	0	0	0	0
CF120_HUMAN	UPF0669 protein C6orf120 OS=Homo sapiens GN=C6orf120 PE=1 SV=1	0.16	0	0.16	0.56	0	0	0.16
CF122_HUMAN	Putative uncharacterized protein encoded by LINC00242 OS=Homo sapiens GN=LINC00242 PE=5 SV=1	0	0	0	0.14	0	0	0
CF136_HUMAN	Uncharacterized protein C6orf136 OS=Homo sapiens GN=C6orf136 PE=2 SV=1	0	0	0	0.09	0	0	0
CF163_HUMAN	Uncharacterized protein C6orf163 OS=Homo sapiens GN=C6orf163 PE=1 SV=2	0	0	0.09	0	0	0	0
CF203_HUMAN	Uncharacterized protein C6orf203 OS=Homo sapiens GN=C6orf203 PE=1 SV=1	0.12	0.25	0.12	0.12	0	0	0
CF211_HUMAN	UPF0364 protein C6orf211 OS=Homo sapiens GN=C6orf211 PE=1 SV=1	1.38	1.1	0.54	0.54	0.13	0.28	1.1
CFAD_HUMAN	Complement factor D OS=Homo sapiens GN=CFD PE=1 SV=5	0	0	0	0.12	0	0	0
CFAH_HUMAN	Complement factor H OS=Homo sapiens GN=CFH PE=1 SV=4	0	0	0	0	0	0	0.02
CFDP1_HUMAN	Craniofacial development protein 1 OS=Homo sapiens GN=CFDP1 PE=1 SV=1	1.13	2.75	0.6	0.33	0.1	0.21	0.33
CG010_HUMAN	CaiB/baiF CoA-transferase family protein C7orf10 OS=Homo sapiens GN=C7orf10 PE=1 SV=2	0.07	0	0	0	0	0	0
CG025_HUMAN	UPF0415 protein C7orf25 OS=Homo sapiens GN=C7orf25 PE=1 SV=1	0.15	0.07	0.07	0	0	0	0
CG026_HUMAN	Uncharacterized protein C7orf26 OS=Homo sapiens GN=C7orf26 PE=2 SV=1	0.13	0.07	0.07	0	0	0	0.07
CG041_HUMAN	UPF0452 protein C7orf41 OS=Homo sapiens GN=C7orf41 PE=2 SV=2	0.5	0.5	0.22	0	0	0	0
CG050_HUMAN	Uncharacterized protein C7orf50 OS=Homo sapiens GN=C7orf50 PE=1 SV=1	1.33	2.1	1.03	1.33	1.03	0.33	0.15
CG055_HUMAN	UPF0562 protein C7orf55 OS=Homo sapiens GN=C7orf55 PE=1 SV=2	0.6	0.6	0.27	0.6	0	0	0.27
CGBP1_HUMAN	CGG triplet repeat-binding protein 1 OS=Homo sapiens GN=CGGBP1 PE=1 SV=2	2.67	4.08	0.92	1.25	0.92	0.38	0.92
CGL_HUMAN	Cystathionine gamma-lyase OS=Homo sapiens GN=CTH PE=1 SV=3	1.69	1.51	0.76	0	0.42	0.42	2.33
CGNL1_HUMAN	Cingulin-like protein 1 OS=Homo sapiens GN=CGNL1 PE=1 SV=2	0.02	0.02	0.02	0.09	0	0.02	0
CGT_HUMAN	2-hydroxyacylsphingosine 1-beta-galactosyltransferase OS=Homo sapiens GN=UGT8 PE=2 SV=2	0.05	0.05	0	0	0	0	0
CH033_HUMAN	UPF0488 protein C8orf33 OS=Homo sapiens GN=C8orf33 PE=1 SV=1	1.7	1.38	0.13	0.64	0.28	0.28	0.13
CH037_HUMAN	Protein C8orf37 OS=Homo sapiens GN=C8orf37 PE=1 SV=1	0.14	0.14	0	0	0	0	0
CH044_HUMAN	Putative uncharacterized protein C8orf44 OS=Homo sapiens GN=C8orf44 PE=2 SV=2	0	0	0	0	0.18	0	0
CH047_HUMAN	Uncharacterized protein C8orf47 OS=Homo sapiens GN=C8orf47 PE=2 SV=1	0.17	0.27	0.08	0	0	0	0.08
CH048_HUMAN	Uncharacterized protein C8orf48 OS=Homo sapiens GN=C8orf48 PE=1 SV=2	0	0.09	0.09	0	0	0	0
CH082_HUMAN	UPF0598 protein C8orf82 OS=Homo sapiens GN=C8orf82 PE=1 SV=2	0.29	0.47	0.14	0.14	0.14	0	0
CH10_HUMAN	10 kDa heat shock protein, mitochondrial OS=Homo sapiens GN=HSPE1 PE=1 SV=2	10.95	19.75	4.23	10.95	0.32	0.32	19.75
CH60_HUMAN	60 kDa heat shock protein, mitochondrial OS=Homo sapiens GN=HSPD1 PE=1 SV=2	15.91	29.08	8.02	76.22	8.51	9.56	104.73
CHAC1_HUMAN	Cation transport regulator-like protein 1 OS=Homo sapiens GN=CHAC1 PE=1 SV=2	0	0.11	0	0	0	0.11	0
CHAC2_HUMAN	Cation transport regulator-like protein 2 OS=Homo sapiens GN=CHAC2 PE=2 SV=1	1.44	1.44	0.81	0.81	0.16	0.35	0.35
CHADL_HUMAN	Chondroadherin-like protein OS=Homo sapiens GN=CHADL PE=2 SV=2	0	0	0.04	0	0	0	0
CHAP1_HUMAN	Chromosome alignment-maintaining phosphoprotein 1 OS=Homo sapiens GN=CHAMP1 PE=1 SV=2	0.65	0.65	0.38	0.24	0.04	0.04	0.2
CHC10_HUMAN	Coiled-coil-helix-coiled-coil-helix domain-containing protein 10, mitochondrial OS=Homo sapiens GN=CHCHD10 PE=1 SV=1	0.53	0.24	0.24	0.24	0	0	0
CHCH1_HUMAN	Coiled-coil-helix-coiled-coil-helix domain-containing protein 1 OS=Homo sapiens GN=CHCHD1 PE=1 SV=1	0.56	0.95	0.56	1.44	0	0	0.56
CHCH2_HUMAN	Coiled-coil-helix-coiled-coil-helix domain-containing protein 2, mitochondrial OS=Homo sapiens GN=CHCHD2 PE=1 SV=1	0.79	0.79	1.18	0.48	0.48	0.22	0
CHCH3_HUMAN	Coiled-coil-helix-coiled-coil-helix domain-containing protein 3, mitochondrial OS=Homo sapiens GN=CHCHD3 PE=1 SV=1	2.29	2.7	1.3	3.69	2.29	1.59	0.81
CHCH5_HUMAN	Coiled-coil-helix-coiled-coil-helix domain-containing protein 5 OS=Homo sapiens GN=CHCHD5 PE=1 SV=1	4.21	3.11	0.6	0.6	0	0	0.27
CHCH6_HUMAN	Coiled-coil-helix-coiled-coil-helix domain-containing protein 6, mitochondrial OS=Homo sapiens GN=CHCHD6 PE=1 SV=1	1.28	1.89	0.6	0.13	0	0.13	0.27
CHCH7_HUMAN	Coiled-coil-helix-coiled-coil-helix domain-containing protein 7 OS=Homo sapiens GN=CHCHD7 PE=1 SV=1	0.34	1.38	0	0	0	0	0
CHCH9_HUMAN	Putative coiled-coil-helix-coiled-coil-helix domain-containing protein CHCHD2P9, mitochondrial OS=Homo sapiens GN=CHCHD2P9 PE=5 SV=1	0	0	0	0	0	0	0.22
CHD1L_HUMAN	Chromodomain-helicase-DNA-binding protein 1-like OS=Homo sapiens GN=CHD1L PE=1 SV=2	0.83	0.77	0.33	0.56	0.07	0.17	0.29
CHD1_HUMAN	Chromodomain-helicase-DNA-binding protein 1 OS=Homo sapiens GN=CHD1 PE=1 SV=2	0.66	0.48	0.16	0.36	0	0.07	0.12
CHD2_HUMAN	Chromodomain-helicase-DNA-binding protein 2 OS=Homo sapiens GN=CHD2 PE=1 SV=2	0.26	0.22	0.05	0.13	0	0.06	0.1
CHD3_HUMAN	Chromodomain-helicase-DNA-binding protein 3 OS=Homo sapiens GN=CHD3 PE=1 SV=3	0.33	0.26	0.1	0.22	0	0	0.1
CHD4_HUMAN	Chromodomain-helicase-DNA-binding protein 4 OS=Homo sapiens GN=CHD4 PE=1 SV=2	1.19	0.86	0.75	1.53	0.36	0.3	0.63
CHD5_HUMAN	Chromodomain-helicase-DNA-binding protein 5 OS=Homo sapiens GN=CHD5 PE=2 SV=1	0	0.26	0	0.28	0	0	0
CHD6_HUMAN	Chromodomain-helicase-DNA-binding protein 6 OS=Homo sapiens GN=CHD6 PE=1 SV=4	0.05	0.12	0	0.04	0	0	0
CHD7_HUMAN	Chromodomain-helicase-DNA-binding protein 7 OS=Homo sapiens GN=CHD7 PE=1 SV=3	0.18	0.1	0	0.09	0.02	0.01	0.05
CHD8_HUMAN	Chromodomain-helicase-DNA-binding protein 8 OS=Homo sapiens GN=CHD8 PE=1 SV=5	0.36	0.25	0.13	0.18	0.01	0	0.03
CHD9_HUMAN	Chromodomain-helicase-DNA-binding protein 9 OS=Homo sapiens GN=CHD9 PE=1 SV=2	0.1	0	0.04	0.04	0	0	0
CHDH_HUMAN	Choline dehydrogenase, mitochondrial OS=Homo sapiens GN=CHDH PE=2 SV=2	0.4	0.27	0.05	0.16	0.1	0.16	0.27
CHERP_HUMAN	Calcium homeostasis endoplasmic reticulum protein OS=Homo sapiens GN=CHERP PE=1 SV=3	0.59	0.64	0.5	0.41	0.17	0.17	0.28
CHID1_HUMAN	Chitinase domain-containing protein 1 OS=Homo sapiens GN=CHID1 PE=1 SV=1	0.53	0.64	0.15	0	0	0.15	0.24
CHIN_HUMAN	N-chimaerin OS=Homo sapiens GN=CHN1 PE=1 SV=3	0	0.13	0.13	0	0	0	0.13
CHIP_HUMAN	E3 ubiquitin-protein ligase CHIP OS=Homo sapiens GN=STUB1 PE=1 SV=2	1.68	2.84	1.45	1.05	0.31	0.71	0.57
CHK1_HUMAN	Serine/threonine-protein kinase Chk1 OS=Homo sapiens GN=CHEK1 PE=1 SV=2	0.79	0.26	0.34	0.26	0.12	0	0.34
CHK2_HUMAN	Serine/threonine-protein kinase Chk2 OS=Homo sapiens GN=CHEK2 PE=1 SV=1	0.6	0.37	0.11	0.23	0	0.05	0.23
CHKA_HUMAN	Choline kinase alpha OS=Homo sapiens GN=CHKA PE=1 SV=3	0.06	0.06	0	0	0	0	0.2
CHKB_HUMAN	Choline/ethanolamine kinase OS=Homo sapiens GN=CHKB PE=1 SV=3	0	0.07	0	0	0	0	0
CHLE_HUMAN	Cholinesterase OS=Homo sapiens GN=BCHE PE=1 SV=1	0	0	0	0	0.05	0	0
CHM1A_HUMAN	Charged multivesicular body protein 1a OS=Homo sapiens GN=CHMP1A PE=1 SV=1	0.77	1.05	0.33	0.54	0	0	0.33
CHM1B_HUMAN	Charged multivesicular body protein 1b OS=Homo sapiens GN=CHMP1B PE=1 SV=1	0	0	0.15	0.15	0.15	0.15	0.15
CHM2A_HUMAN	Charged multivesicular body protein 2a OS=Homo sapiens GN=CHMP2A PE=1 SV=1	1.72	0.87	0.65	1.12	0.13	0.28	1.12
CHM2B_HUMAN	Charged multivesicular body protein 2b OS=Homo sapiens GN=CHMP2B PE=1 SV=1	0.3	0.69	0.3	0.69	0.14	0.14	0.3
CHM4A_HUMAN	Charged multivesicular body protein 4a OS=Homo sapiens GN=CHMP4A PE=1 SV=3	0.87	1.4	0.46	0.46	0.13	0.13	0.87
CHM4B_HUMAN	Charged multivesicular body protein 4b OS=Homo sapiens GN=CHMP4B PE=1 SV=1	0.46	1.41	0.87	0.65	0.13	0.13	0.13
CHM4C_HUMAN	Charged multivesicular body protein 4c OS=Homo sapiens GN=CHMP4C PE=1 SV=1	0.13	0.13	0	0	0	0	0
CHMP3_HUMAN	Charged multivesicular body protein 3 OS=Homo sapiens GN=CHMP3 PE=1 SV=3	0.28	0.28	0.13	0.28	0.13	0	0.13
CHMP5_HUMAN	Charged multivesicular body protein 5 OS=Homo sapiens GN=CHMP5 PE=1 SV=1	0.89	0.89	0.66	2.14	0	0	2.14
CHMP6_HUMAN	Charged multivesicular body protein 6 OS=Homo sapiens GN=CHMP6 PE=1 SV=3	0.49	0.7	0.49	0.3	0.14	0.3	0.94
CHMP7_HUMAN	Charged multivesicular body protein 7 OS=Homo sapiens GN=CHMP7 PE=1 SV=1	0.55	0.55	0.21	0.06	0	0	0.06
CHP1_HUMAN	Calcineurin B homologous protein 1 OS=Homo sapiens GN=CHP1 PE=1 SV=3	1.01	1.65	0.32	1.01	0.32	0	0.15
CHP3_HUMAN	Calcineurin B homologous protein 3 OS=Homo sapiens GN=TESC PE=1 SV=3	0.29	0.13	0	0	0	0	0
CHPF2_HUMAN	Chondroitin sulfate glucuronyltransferase OS=Homo sapiens GN=CHPF2 PE=2 SV=2	0	0.04	0.04	0	0	0	0
CHPT1_HUMAN	Cholinephosphotransferase 1 OS=Homo sapiens GN=CHPT1 PE=2 SV=1	0.15	0	0	0.07	0	0	0.07
CHRC1_HUMAN	Chromatin accessibility complex protein 1 OS=Homo sapiens GN=CHRAC1 PE=1 SV=1	1.29	1.29	0.86	1.29	0	0	0.86
CHRD1_HUMAN	Cysteine and histidine-rich domain-containing protein 1 OS=Homo sapiens GN=CHORDC1 PE=1 SV=2	4.25	3.09	1.49	6.31	0.64	0.79	1.29
CHSP1_HUMAN	Calcium-regulated heat stable protein 1 OS=Homo sapiens GN=CARHSP1 PE=1 SV=2	2.81	1.15	1.6	1.6	0.47	0.47	1.6
CHSS1_HUMAN	Chondroitin sulfate synthase 1 OS=Homo sapiens GN=CHSY1 PE=1 SV=3	0	0.04	0	0	0	0	0
CHSS2_HUMAN	Chondroitin sulfate synthase 2 OS=Homo sapiens GN=CHPF PE=1 SV=2	0	0.08	0	0	0	0	0
CHSS3_HUMAN	Chondroitin sulfate synthase 3 OS=Homo sapiens GN=CHSY3 PE=2 SV=3	0	0	0.03	0	0	0	0
CHSTB_HUMAN	Carbohydrate sulfotransferase 11 OS=Homo sapiens GN=CHST11 PE=1 SV=1	0	0	0	0	0	0	0.08
CHSTC_HUMAN	Carbohydrate sulfotransferase 12 OS=Homo sapiens GN=CHST12 PE=1 SV=2	0	0	0	0.22	0	0	0
CHSTD_HUMAN	Carbohydrate sulfotransferase 13 OS=Homo sapiens GN=CHST13 PE=2 SV=1	0.08	0	0	0	0	0	0
CHSTE_HUMAN	Carbohydrate sulfotransferase 14 OS=Homo sapiens GN=CHST14 PE=1 SV=2	0.34	0.08	0	0	0	0	0
CHTOP_HUMAN	Chromatin target of PRMT1 protein OS=Homo sapiens GN=CHTOP PE=1 SV=2	0.81	0.61	0.61	1.04	0.27	0.27	1.3
CHUR_HUMAN	Protein Churchill OS=Homo sapiens GN=CHURC1 PE=1 SV=2	0.45	0.74	0.45	0.2	0	0	0
CI040_HUMAN	Uncharacterized protein C9orf40 OS=Homo sapiens GN=C9orf40 PE=1 SV=1	0.81	0.16	0.34	0.16	0	0	0
CI041_HUMAN	UPF0586 protein C9orf41 OS=Homo sapiens GN=C9orf41 PE=1 SV=1	0.22	0.14	0.14	0	0.07	0	0.07
CI050_HUMAN	Uncharacterized protein C9orf50 OS=Homo sapiens GN=C9orf50 PE=2 SV=1	0	0.14	0.14	0	0	0	0
CI064_HUMAN	UPF0553 protein C9orf64 OS=Homo sapiens GN=C9orf64 PE=1 SV=1	1.85	2.35	0.38	2.09	0.38	0.76	1.24
CI066_HUMAN	Uncharacterized protein C9orf66 OS=Homo sapiens GN=C9orf66 PE=2 SV=1	0	0.11	0	0.11	0	0	0
CI072_HUMAN	Protein C9orf72 OS=Homo sapiens GN=C9orf72 PE=1 SV=2	0.06	0	0.06	0.12	0	0.06	0.42
CI078_HUMAN	Uncharacterized protein C9orf78 OS=Homo sapiens GN=C9orf78 PE=1 SV=1	0.6	0.76	0.76	0.1	0	0	0
CI114_HUMAN	Uncharacterized protein C9orf114 OS=Homo sapiens GN=C9orf114 PE=1 SV=3	0.16	0.25	0.16	0	0	0.08	0.45
CI116_HUMAN	UPF0691 protein C9orf116 OS=Homo sapiens GN=C9orf116 PE=2 SV=1	0	0.22	0	0	0	0	0
CI142_HUMAN	Uncharacterized protein C9orf142 OS=Homo sapiens GN=C9orf142 PE=1 SV=2	1.34	1.34	0.15	0.53	0.53	0.33	0
CIA30_HUMAN	Complex I intermediate-associated protein 30, mitochondrial OS=Homo sapiens GN=NDUFAF1 PE=1 SV=2	1.13	0.4	0.18	1.31	0.09	0.09	0.18
CIAO1_HUMAN	Probable cytosolic iron-sulfur protein assembly protein CIAO1 OS=Homo sapiens GN=CIAO1 PE=1 SV=1	1.67	1.89	0.39	0.09	0	0.18	0.18
CIB1_HUMAN	Calcium and integrin-binding protein 1 OS=Homo sapiens GN=CIB1 PE=1 SV=4	0.33	0	0	0	0	0	0
CIC_HUMAN	Protein capicua homolog OS=Homo sapiens GN=CIC PE=1 SV=2	0.02	0.06	0	0	0	0	0
CILP1_HUMAN	Cartilage intermediate layer protein 1 OS=Homo sapiens GN=CILP PE=1 SV=4	0	0	0	0.05	0	0	0
CILP2_HUMAN	Cartilage intermediate layer protein 2 OS=Homo sapiens GN=CILP2 PE=2 SV=2	0	0	0	0.05	0.03	0	0
CING_HUMAN	Cingulin OS=Homo sapiens GN=CGN PE=1 SV=2	0.57	0.39	0.1	0.18	0	0	0.07
CINP_HUMAN	Cyclin-dependent kinase 2-interacting protein OS=Homo sapiens GN=CINP PE=1 SV=1	0.14	0.47	0	0	0	0	0.14
CIP2A_HUMAN	Protein CIP2A OS=Homo sapiens GN=KIAA1524 PE=1 SV=2	1.32	0.99	0.55	0.65	0.28	0.21	0.41
CIP4_HUMAN	Cdc42-interacting protein 4 OS=Homo sapiens GN=TRIP10 PE=1 SV=3	0.6	0.45	0.1	0.45	0.05	0.05	0.15
CIR1A_HUMAN	Cirhin OS=Homo sapiens GN=CIRH1A PE=1 SV=1	0.79	0.79	0.45	0.94	0.28	0.34	0.39
CIR1_HUMAN	Corepressor interacting with RBPJ 1 OS=Homo sapiens GN=CIR1 PE=1 SV=1	0	0	0	0	0.06	0	0
CIRBP_HUMAN	Cold-inducible RNA-binding protein OS=Homo sapiens GN=CIRBP PE=1 SV=1	1.3	2.2	0.65	1.3	0.39	0.18	1.71
CISD1_HUMAN	CDGSH iron-sulfur domain-containing protein 1 OS=Homo sapiens GN=CISD1 PE=1 SV=1	4.58	1.67	1.67	1.09	0	0	0.63
CISD2_HUMAN	CDGSH iron-sulfur domain-containing protein 2 OS=Homo sapiens GN=CISD2 PE=1 SV=1	2.99	2.27	1.69	2.99	0	0	2.27
CISD3_HUMAN	CDGSH iron-sulfur domain-containing protein 3, mitochondrial OS=Homo sapiens GN=CISD3 PE=1 SV=1	0.23	0	0	0	0	0	0
CISY_HUMAN	Citrate synthase, mitochondrial OS=Homo sapiens GN=CS PE=1 SV=2	1.52	1.22	1.09	0.2	0.64	0.85	2.03
CIZ1_HUMAN	Cip1-interacting zinc finger protein OS=Homo sapiens GN=CIZ1 PE=1 SV=2	0.56	0.38	0.1	0.17	0.03	0.03	0.07
CJ012_HUMAN	Uncharacterized protein C10orf12 OS=Homo sapiens GN=C10orf12 PE=1 SV=1	0.05	0.07	0	0	0	0	0.02
CJ032_HUMAN	UPF0693 protein C10orf32 OS=Homo sapiens GN=C10orf32 PE=1 SV=1	0.68	0.68	0.68	0.3	0	0	0
CJ035_HUMAN	Uncharacterized protein C10orf35 OS=Homo sapiens GN=C10orf35 PE=1 SV=1	0.26	0	0	0.58	0	0	0
CJ068_HUMAN	Uncharacterized protein C10orf68 OS=Homo sapiens GN=C10orf68 PE=2 SV=2	0	0	0	0.05	0	0	0
CJ076_HUMAN	UPF0668 protein C10orf76 OS=Homo sapiens GN=C10orf76 PE=2 SV=1	0.22	0.13	0.04	0.22	0	0.04	0.22
CJ088_HUMAN	Uncharacterized protein C10orf88 OS=Homo sapiens GN=C10orf88 PE=1 SV=2	0.29	0.21	0	0.07	0	0	0.07
CJ111_HUMAN	Uncharacterized protein C10orf111 OS=Homo sapiens GN=C10orf111 PE=2 SV=1	0	0	0	0.19	0	0	0
CJ118_HUMAN	Uncharacterized protein C10orf118 OS=Homo sapiens GN=C10orf118 PE=1 SV=2	0.13	0.06	0	0	0	0	0.03
CK049_HUMAN	UPF0705 protein C11orf49 OS=Homo sapiens GN=C11orf49 PE=2 SV=2	0	0	0	0.09	0	0	0
CK054_HUMAN	Ester hydrolase C11orf54 OS=Homo sapiens GN=C11orf54 PE=1 SV=1	0.71	1.23	0.31	0.43	0.31	0.09	0.19
CK057_HUMAN	Uncharacterized protein C11orf57 OS=Homo sapiens GN=C11orf57 PE=1 SV=2	0.1	0.2	0	0	0	0	0
CK068_HUMAN	UPF0696 protein C11orf68 OS=Homo sapiens GN=C11orf68 PE=1 SV=2	0.41	0.41	0.41	0.41	0.12	0.41	0.12
CK070_HUMAN	Uncharacterized protein C11orf70 OS=Homo sapiens GN=C11orf70 PE=2 SV=3	0	0	0	0.11	0	0	0
CK074_HUMAN	Uncharacterized protein C11orf74 OS=Homo sapiens GN=C11orf74 PE=2 SV=1	0	0.13	0	0	0	0	0
CK083_HUMAN	UPF0723 protein C11orf83 OS=Homo sapiens GN=C11orf83 PE=1 SV=2	0.34	0	0	0	0.34	0	0
CK084_HUMAN	Uncharacterized protein C11orf84 OS=Homo sapiens GN=C11orf84 PE=1 SV=3	0.59	0.59	0	0	0	0	0.08
CK088_HUMAN	UPF0722 protein C11orf88 OS=Homo sapiens GN=C11orf88 PE=2 SV=2	0.17	0	0	0	0	0	0
CK096_HUMAN	Uncharacterized protein C11orf96 OS=Homo sapiens GN=C11orf96 PE=1 SV=3	0	0.07	0	0	0	0	0
CK5P1_HUMAN	CDK5 regulatory subunit-associated protein 1 OS=Homo sapiens GN=CDK5RAP1 PE=1 SV=2	0.32	0.21	0	0.05	0	0.1	0.1
CK5P2_HUMAN	CDK5 regulatory subunit-associated protein 2 OS=Homo sapiens GN=CDK5RAP2 PE=1 SV=5	0.06	0.08	0.05	0.05	0	0	0
CK5P3_HUMAN	CDK5 regulatory subunit-associated protein 3 OS=Homo sapiens GN=CDK5RAP3 PE=1 SV=2	1.44	0.95	0.75	0.85	0.12	0.32	0.48
CKAP2_HUMAN	Cytoskeleton-associated protein 2 OS=Homo sapiens GN=CKAP2 PE=1 SV=1	0.45	0.45	0.34	0.45	0.04	0.13	0.23
CKAP4_HUMAN	Cytoskeleton-associated protein 4 OS=Homo sapiens GN=CKAP4 PE=1 SV=2	3.73	3.73	1.4	4.21	1.07	1.64	3.09
CKAP5_HUMAN	Cytoskeleton-associated protein 5 OS=Homo sapiens GN=CKAP5 PE=1 SV=3	1.91	1.19	0.6	1.42	0.29	0.39	0.77
CKLF6_HUMAN	CKLF-like MARVEL transmembrane domain-containing protein 6 OS=Homo sapiens GN=CMTM6 PE=1 SV=1	0	0.16	0.16	0.16	0	0	0
CKP2L_HUMAN	Cytoskeleton-associated protein 2-like OS=Homo sapiens GN=CKAP2L PE=1 SV=4	0.04	0.08	0	0.04	0.04	0	0
CKS1_HUMAN	Cyclin-dependent kinases regulatory subunit 1 OS=Homo sapiens GN=CKS1B PE=1 SV=1	0.85	0.85	0.36	0.36	0	0	0.36
CKS2_HUMAN	Cyclin-dependent kinases regulatory subunit 2 OS=Homo sapiens GN=CKS2 PE=1 SV=1	0.35	2.34	0.83	0	0	0	0
CL004_HUMAN	Uncharacterized protein C12orf4 OS=Homo sapiens GN=C12orf4 PE=2 SV=1	0.1	0	0	0	0	0	0
CL023_HUMAN	UPF0444 transmembrane protein C12orf23 OS=Homo sapiens GN=C12orf23 PE=1 SV=1	1.79	0.67	1.16	2.6	0	0	1.16
CL029_HUMAN	Uncharacterized protein C12orf29 OS=Homo sapiens GN=C12orf29 PE=1 SV=2	1.12	0.4	0.09	0.18	0	0.18	0
CL043_HUMAN	Uncharacterized protein C12orf43 OS=Homo sapiens GN=C12orf43 PE=1 SV=2	0.95	1.18	0.4	0.25	0.12	0.25	0.25
CL045_HUMAN	Uncharacterized protein C12orf45 OS=Homo sapiens GN=C12orf45 PE=1 SV=2	0	0.17	0.17	0	0.17	0	0
CL056_HUMAN	Uncharacterized protein C12orf56 OS=Homo sapiens GN=C12orf56 PE=2 SV=3	0	0	0	0.05	0	0	0
CL071_HUMAN	Uncharacterized protein C12orf71 OS=Homo sapiens GN=C12orf71 PE=2 SV=3	0	0	0	0.11	0	0	0
CL073_HUMAN	Uncharacterized protein C12orf73 OS=Homo sapiens GN=C12orf73 PE=2 SV=2	0.43	0	0	0	0	0	0
CL074_HUMAN	Uncharacterized protein C12orf74 OS=Homo sapiens GN=C12orf74 PE=2 SV=1	0	0	0	0.16	0	0	0
CL076_HUMAN	Uncharacterized protein C12orf76 OS=Homo sapiens GN=C12orf76 PE=2 SV=1	0	0	0.22	0	0	0	0
CL16A_HUMAN	Protein CLEC16A OS=Homo sapiens GN=CLEC16A PE=2 SV=2	0	0.03	0	0.06	0.03	0	0.03
CLAP1_HUMAN	CLIP-associating protein 1 OS=Homo sapiens GN=CLASP1 PE=1 SV=1	1.02	0.7	0.43	0.73	0.12	0.12	0.43
CLAP2_HUMAN	CLIP-associating protein 2 OS=Homo sapiens GN=CLASP2 PE=1 SV=2	1.49	0.85	0.61	0.89	0.12	0.12	0.54
CLASR_HUMAN	CLK4-associating serine/arginine rich protein OS=Homo sapiens GN=CLASRP PE=1 SV=4	0.13	0.09	0	0	0	0	0
CLC2A_HUMAN	C-type lectin domain family 2 member A OS=Homo sapiens GN=CLEC2A PE=1 SV=2	0	0	0	0.17	0	0	0
CLCA2_HUMAN	Calcium-activated chloride channel regulator 2 OS=Homo sapiens GN=CLCA2 PE=1 SV=2	0	0	0	0.03	0	0	0
CLCA3_HUMAN	Calcium-activated chloride channel regulator family member 3 OS=Homo sapiens GN=CLCA3P PE=1 SV=1	0	0	0	0.11	0	0	0.11
CLCA_HUMAN	Clathrin light chain A OS=Homo sapiens GN=CLTA PE=1 SV=1	0.59	0.78	0.26	0.78	0.26	0.26	0.59
CLCB_HUMAN	Clathrin light chain B OS=Homo sapiens GN=CLTB PE=1 SV=1	0.45	1.7	0.28	0.28	0.13	0.28	0.28
CLCC1_HUMAN	Chloride channel CLIC-like protein 1 OS=Homo sapiens GN=CLCC1 PE=1 SV=1	1.15	0.43	0.17	0.36	0.11	0.29	0.29
CLCF1_HUMAN	Cardiotrophin-like cytokine factor 1 OS=Homo sapiens GN=CLCF1 PE=1 SV=1	0	0	0	0	0	0	0.13
CLCN3_HUMAN	H(+)/Cl(-) exchange transporter 3 OS=Homo sapiens GN=CLCN3 PE=1 SV=2	0.23	0	0.11	0	0	0.04	0.04
CLCN4_HUMAN	H(+)/Cl(-) exchange transporter 4 OS=Homo sapiens GN=CLCN4 PE=1 SV=2	0.12	0	0	0	0.04	0	0
CLCN5_HUMAN	H(+)/Cl(-) exchange transporter 5 OS=Homo sapiens GN=CLCN5 PE=1 SV=1	0	0.12	0	0	0	0	0
CLCN7_HUMAN	H(+)/Cl(-) exchange transporter 7 OS=Homo sapiens GN=CLCN7 PE=1 SV=2	0.11	0.24	0.04	0.04	0.04	0.07	0.04
CLD12_HUMAN	Claudin-12 OS=Homo sapiens GN=CLDN12 PE=1 SV=1	0.12	0.12	0.12	0	0	0	0.12
CLD18_HUMAN	Claudin-18 OS=Homo sapiens GN=CLDN18 PE=1 SV=1	0	0.12	0	0	0	0	0
CLD1_HUMAN	Claudin-1 OS=Homo sapiens GN=CLDN1 PE=1 SV=1	0	0	0	0.14	0	0	0
CLD3_HUMAN	Claudin-3 OS=Homo sapiens GN=CLDN3 PE=1 SV=1	0	0.14	0	0.14	0	0	0
CLD6_HUMAN	Claudin-6 OS=Homo sapiens GN=CLDN6 PE=1 SV=2	0	0	0	0	0	0	0.14
CLDN1_HUMAN	Claudin domain-containing protein 1 OS=Homo sapiens GN=CLDND1 PE=1 SV=1	0.38	0.38	0.11	0.11	0	0	0
CLGN_HUMAN	Calmegin OS=Homo sapiens GN=CLGN PE=1 SV=1	0.15	0.26	0.05	0.44	0	0	0.15
CLH1_HUMAN	Clathrin heavy chain 1 OS=Homo sapiens GN=CLTC PE=1 SV=5	3.36	5.31	2.28	9.96	1.27	1.35	5.86
CLH2_HUMAN	Clathrin heavy chain 2 OS=Homo sapiens GN=CLTCL1 PE=1 SV=2	0.46	0.56	0	0.82	0	0	0
CLIC1_HUMAN	Chloride intracellular channel protein 1 OS=Homo sapiens GN=CLIC1 PE=1 SV=4	4.67	7.02	6.14	10.34	1.25	1	11.73
CLIC4_HUMAN	Chloride intracellular channel protein 4 OS=Homo sapiens GN=CLIC4 PE=1 SV=4	4.11	4.11	1.66	7.81	0.11	0.24	5.35
CLIC5_HUMAN	Chloride intracellular channel protein 5 OS=Homo sapiens GN=CLIC5 PE=1 SV=3	0	0	0.23	0	0	0	0
CLIC6_HUMAN	Chloride intracellular channel protein 6 OS=Homo sapiens GN=CLIC6 PE=2 SV=3	0.04	0.04	0	0	0	0	0
CLIP1_HUMAN	CAP-Gly domain-containing linker protein 1 OS=Homo sapiens GN=CLIP1 PE=1 SV=2	0.64	0.85	0.24	0.24	0.02	0.02	0.1
CLIP2_HUMAN	CAP-Gly domain-containing linker protein 2 OS=Homo sapiens GN=CLIP2 PE=1 SV=1	0.15	0.36	0.09	0	0	0	0
CLK1_HUMAN	Dual specificity protein kinase CLK1 OS=Homo sapiens GN=CLK1 PE=1 SV=2	0.06	0	0	0	0	0	0
CLK2_HUMAN	Dual specificity protein kinase CLK2 OS=Homo sapiens GN=CLK2 PE=1 SV=1	0	0.11	0.05	0.05	0	0	0
CLK3_HUMAN	Dual specificity protein kinase CLK3 OS=Homo sapiens GN=CLK3 PE=1 SV=3	0.19	0	0.04	0.14	0	0	0.09
CLM8_HUMAN	CMRF35-like molecule 8 OS=Homo sapiens GN=CD300A PE=1 SV=2	0.1	0	0	0	0	0	0
CLM9_HUMAN	CMRF35-like molecule 9 OS=Homo sapiens GN=CD300LG PE=1 SV=2	0	0	0.09	0	0	0	0
CLMN_HUMAN	Calmin OS=Homo sapiens GN=CLMN PE=1 SV=1	0.09	0.06	0.03	0	0	0	0
CLN5_HUMAN	Ceroid-lipofuscinosis neuronal protein 5 OS=Homo sapiens GN=CLN5 PE=1 SV=2	0.7	0.46	0.36	0.46	0.16	0.26	0.58
CLN6_HUMAN	Ceroid-lipofuscinosis neuronal protein 6 OS=Homo sapiens GN=CLN6 PE=1 SV=1	0.19	0.19	0.09	0.42	0	0	0.09
CLNK_HUMAN	Cytokine-dependent hematopoietic cell linker OS=Homo sapiens GN=CLNK PE=2 SV=2	0.14	0.07	0.07	0.07	0	0	0.07
CLOCK_HUMAN	Circadian locomoter output cycles protein kaput OS=Homo sapiens GN=CLOCK PE=1 SV=1	0.03	0	0	0	0	0	0
CLP1L_HUMAN	Cleft lip and palate transmembrane protein 1-like protein OS=Homo sapiens GN=CLPTM1L PE=1 SV=1	0.05	0.23	0	0.11	0.05	0	0.23
CLP1_HUMAN	Polyribonucleotide 5'-hydroxyl-kinase Clp1 OS=Homo sapiens GN=CLP1 PE=1 SV=1	0.39	0.14	0.14	0.22	0.14	0.14	0.49
CLPB_HUMAN	Caseinolytic peptidase B protein homolog OS=Homo sapiens GN=CLPB PE=1 SV=1	0.91	0.63	0.56	0.84	0.33	0.28	0.99
CLPP_HUMAN	Putative ATP-dependent Clp protease proteolytic subunit, mitochondrial OS=Homo sapiens GN=CLPP PE=1 SV=1	1.82	1.82	1.29	2.47	0.37	0.68	0.68
CLPT1_HUMAN	Cleft lip and palate transmembrane protein 1 OS=Homo sapiens GN=CLPTM1 PE=1 SV=1	0.34	0.23	0.18	0.23	0.04	0.04	0.18
CLPX_HUMAN	ATP-dependent Clp protease ATP-binding subunit clpX-like, mitochondrial OS=Homo sapiens GN=CLPX PE=1 SV=2	1.28	1.28	0.66	0.9	0.38	0.73	1.18
CLSPN_HUMAN	Claspin OS=Homo sapiens GN=CLSPN PE=1 SV=3	0.14	0.26	0.04	0.04	0	0	0
CLUA1_HUMAN	Clusterin-associated protein 1 OS=Homo sapiens GN=CLUAP1 PE=1 SV=4	0	0.14	0	0	0	0	0
CLUS_HUMAN	Clusterin OS=Homo sapiens GN=CLU PE=1 SV=1	0	0.27	0	0	0	0	0
CLU_HUMAN	Clustered mitochondria protein homolog OS=Homo sapiens GN=CLUH PE=1 SV=2	1.4	0.88	0.58	0.97	0.17	0.19	0.62
CLYBL_HUMAN	Citrate lyase subunit beta-like protein, mitochondrial OS=Homo sapiens GN=CLYBL PE=2 SV=2	0.81	0.66	0.29	1.14	0	0.09	1.14
CMBL_HUMAN	Carboxymethylenebutenolidase homolog OS=Homo sapiens GN=CMBL PE=1 SV=1	2.38	1.17	0.74	1.17	0.25	0.25	0.39
CMC1_HUMAN	Calcium-binding mitochondrial carrier protein Aralar1 OS=Homo sapiens GN=SLC25A12 PE=1 SV=2	1.45	1.25	0.47	1.67	0.35	0.74	0.82
CMC2_HUMAN	Calcium-binding mitochondrial carrier protein Aralar2 OS=Homo sapiens GN=SLC25A13 PE=1 SV=2	2.07	2.49	1.27	4.86	0.91	1.37	2.65
CMC4_HUMAN	Cx9C motif-containing protein 4 OS=Homo sapiens GN=CMC4 PE=1 SV=1	0.43	0.43	0	0	0	0	0.43
CMGA_HUMAN	Chromogranin-A OS=Homo sapiens GN=CHGA PE=1 SV=7	0	0	0	0.06	0	0	0
CMIP_HUMAN	C-Maf-inducing protein OS=Homo sapiens GN=CMIP PE=1 SV=3	0.04	0.12	0	0.04	0	0	0.04
CMKMT_HUMAN	Calmodulin-lysine N-methyltransferase OS=Homo sapiens GN=CAMKMT PE=1 SV=2	0.19	0.09	0	0.19	0.09	0.09	0
CMS1_HUMAN	Protein CMSS1 OS=Homo sapiens GN=CMSS1 PE=1 SV=2	1.19	0.34	0.63	1.42	0.22	0.22	0.63
CMTD1_HUMAN	Catechol O-methyltransferase domain-containing protein 1 OS=Homo sapiens GN=COMTD1 PE=1 SV=1	0	0	0	0	0	0	0.11
CN080_HUMAN	Uncharacterized protein C14orf80 OS=Homo sapiens GN=C14orf80 PE=2 SV=2	0.19	0.06	0.06	0.06	0	0	0.12
CN119_HUMAN	Uncharacterized protein C14orf119 OS=Homo sapiens GN=C14orf119 PE=1 SV=1	0.47	0.21	0	0	0	0	0
CN139_HUMAN	Putative uncharacterized protein encoded by LINC00341 OS=Homo sapiens GN=LINC00341 PE=5 SV=1	0	0.16	0	0	0	0	0
CN142_HUMAN	Uncharacterized protein C14orf142 OS=Homo sapiens GN=C14orf142 PE=2 SV=2	1.29	1.29	0.32	0.32	0	0	0
CN159_HUMAN	UPF0317 protein C14orf159, mitochondrial OS=Homo sapiens GN=C14orf159 PE=1 SV=2	0.1	0.1	0	0	0	0.05	0.05
CN166_HUMAN	UPF0568 protein C14orf166 OS=Homo sapiens GN=C14orf166 PE=1 SV=1	2.06	4.97	1.73	6.47	0.4	0.56	2.42
CN37_HUMAN	2',3'-cyclic-nucleotide 3'-phosphodiesterase OS=Homo sapiens GN=CNP PE=1 SV=2	2.54	2.1	1.37	0.3	0.59	0.94	2.31
CNAS1_HUMAN	Uncharacterized protein CSNK1G2-AS1 OS=Homo sapiens GN=CSNK1G2-AS1 PE=2 SV=2	0	0	0	0.21	0	0	0
CNBP1_HUMAN	Beta-catenin-interacting protein 1 OS=Homo sapiens GN=CTNNBIP1 PE=1 SV=1	0	0.38	0	0	0	0	0
CNBP_HUMAN	Cellular nucleic acid-binding protein OS=Homo sapiens GN=CNBP PE=1 SV=1	1.86	4.21	1.46	0.35	0	0	0.16
CND1_HUMAN	Condensin complex subunit 1 OS=Homo sapiens GN=NCAPD2 PE=1 SV=3	1.55	1.4	0.66	1.83	0.23	0.2	1
CND2_HUMAN	Condensin complex subunit 2 OS=Homo sapiens GN=NCAPH PE=1 SV=3	1	1	0.53	1.16	0.08	0.21	0.53
CND3_HUMAN	Condensin complex subunit 3 OS=Homo sapiens GN=NCAPG PE=1 SV=1	1.31	1.38	0.61	1.31	0.32	0.25	1.01
CNDD3_HUMAN	Condensin-2 complex subunit D3 OS=Homo sapiens GN=NCAPD3 PE=1 SV=2	0.33	0.35	0.1	0.38	0.02	0.02	0.12
CNDG2_HUMAN	Condensin-2 complex subunit G2 OS=Homo sapiens GN=NCAPG2 PE=1 SV=1	0.41	0.22	0.1	0.19	0.05	0.02	0.13
CNDH2_HUMAN	Condensin-2 complex subunit H2 OS=Homo sapiens GN=NCAPH2 PE=1 SV=1	0.21	0.1	0.05	0.21	0.05	0.05	0.1
CNDP2_HUMAN	Cytosolic non-specific dipeptidase OS=Homo sapiens GN=CNDP2 PE=1 SV=2	2.53	2.13	0.94	1.78	0.27	0.62	2.98
CNEP1_HUMAN	CTD nuclear envelope phosphatase 1 OS=Homo sapiens GN=CTDNEP1 PE=1 SV=2	0	0.12	0.12	0.12	0	0	0
CNGA1_HUMAN	cGMP-gated cation channel alpha-1 OS=Homo sapiens GN=CNGA1 PE=1 SV=3	0	0	0	0.08	0	0	0
CNGB1_HUMAN	Cyclic nucleotide-gated cation channel beta-1 OS=Homo sapiens GN=CNGB1 PE=1 SV=2	0.05	0.05	0	0	0.02	0	0
CNGB3_HUMAN	Cyclic nucleotide-gated cation channel beta-3 OS=Homo sapiens GN=CNGB3 PE=1 SV=2	0	0	0	0.07	0	0	0
CNIH4_HUMAN	Protein cornichon homolog 4 OS=Homo sapiens GN=CNIH4 PE=1 SV=1	0.21	0.21	0.21	0	0	0	0.21
CNKR1_HUMAN	Connector enhancer of kinase suppressor of ras 1 OS=Homo sapiens GN=CNKSR1 PE=1 SV=1	0.04	0.04	0	0	0	0	0
CNN2_HUMAN	Calponin-2 OS=Homo sapiens GN=CNN2 PE=1 SV=4	1.1	0.75	0.45	0.32	0.2	0.32	0.32
CNN3_HUMAN	Calponin-3 OS=Homo sapiens GN=CNN3 PE=1 SV=1	2.09	2.68	1.18	2.37	0.42	0.3	0.42
CNNM1_HUMAN	Metal transporter CNNM1 OS=Homo sapiens GN=CNNM1 PE=2 SV=3	0.06	0	0	0	0	0	0
CNNM2_HUMAN	Metal transporter CNNM2 OS=Homo sapiens GN=CNNM2 PE=1 SV=2	0	0.14	0	0	0	0	0
CNNM3_HUMAN	Metal transporter CNNM3 OS=Homo sapiens GN=CNNM3 PE=1 SV=1	0.73	0.59	0.4	0.29	0.04	0	0.09
CNNM4_HUMAN	Metal transporter CNNM4 OS=Homo sapiens GN=CNNM4 PE=1 SV=3	0.12	0.25	0.04	0.12	0	0.04	0
CNO10_HUMAN	CCR4-NOT transcription complex subunit 10 OS=Homo sapiens GN=CNOT10 PE=1 SV=1	0.36	0.42	0.21	0.65	0	0.04	0.17
CNO11_HUMAN	CCR4-NOT transcription complex subunit 11 OS=Homo sapiens GN=CNOT11 PE=1 SV=1	0.12	0.19	0.12	0.41	0	0.12	0.5
CNO6L_HUMAN	CCR4-NOT transcription complex subunit 6-like OS=Homo sapiens GN=CNOT6L PE=1 SV=2	0	0.11	0	0.11	0.05	0.05	0.35
CNOT1_HUMAN	CCR4-NOT transcription complex subunit 1 OS=Homo sapiens GN=CNOT1 PE=1 SV=2	0.96	0.87	0.58	0.72	0.17	0.29	0.44
CNOT2_HUMAN	CCR4-NOT transcription complex subunit 2 OS=Homo sapiens GN=CNOT2 PE=1 SV=1	0.45	0.11	0.17	0.11	0.05	0.17	0.11
CNOT3_HUMAN	CCR4-NOT transcription complex subunit 3 OS=Homo sapiens GN=CNOT3 PE=1 SV=1	0.54	0.32	0.17	0.42	0	0	0.17
CNOT4_HUMAN	CCR4-NOT transcription complex subunit 4 OS=Homo sapiens GN=CNOT4 PE=1 SV=3	0.49	0.49	0	0.16	0	0.05	0.05
CNOT7_HUMAN	CCR4-NOT transcription complex subunit 7 OS=Homo sapiens GN=CNOT7 PE=1 SV=3	0.33	0.47	0.33	0.33	0.1	0.1	1.15
CNOT8_HUMAN	CCR4-NOT transcription complex subunit 8 OS=Homo sapiens GN=CNOT8 PE=1 SV=1	0.32	0.45	0.21	0.45	0.21	0.21	1.11
CNPY2_HUMAN	Protein canopy homolog 2 OS=Homo sapiens GN=CNPY2 PE=1 SV=1	4.94	5.89	1.83	1.83	0.56	0.56	1.1
CNPY3_HUMAN	Protein canopy homolog 3 OS=Homo sapiens GN=CNPY3 PE=1 SV=1	0.84	0.84	0.66	0.5	0	0	0.11
CNPY4_HUMAN	Protein canopy homolog 4 OS=Homo sapiens GN=CNPY4 PE=2 SV=1	0.39	0.73	0	0	0	0	0.25
CNST_HUMAN	Consortin OS=Homo sapiens GN=CNST PE=1 SV=3	0.08	0.04	0	0	0	0	0
CNTD2_HUMAN	Cyclin N-terminal domain-containing protein 2 OS=Homo sapiens GN=CNTD2 PE=2 SV=2	0	0	0	0.1	0	0	0
CNTFR_HUMAN	Ciliary neurotrophic factor receptor subunit alpha OS=Homo sapiens GN=CNTFR PE=1 SV=2	0.08	0	0	0.08	0	0	0
CNTLN_HUMAN	Centlein OS=Homo sapiens GN=CNTLN PE=2 SV=5	0	0.06	0	0	0	0	0
CNTN5_HUMAN	Contactin-5 OS=Homo sapiens GN=CNTN5 PE=2 SV=2	0	0	0	0.05	0	0	0
CNTP1_HUMAN	Contactin-associated protein 1 OS=Homo sapiens GN=CNTNAP1 PE=1 SV=1	0	0.04	0.02	0	0	0.02	0
CNTP4_HUMAN	Contactin-associated protein-like 4 OS=Homo sapiens GN=CNTNAP4 PE=1 SV=3	0.07	0.04	0	0	0	0	0
CNTRL_HUMAN	Centriolin OS=Homo sapiens GN=CNTRL PE=1 SV=2	0	0.07	0	0	0.01	0	0
CO038_HUMAN	UPF0552 protein C15orf38 OS=Homo sapiens GN=C15orf38 PE=2 SV=1	0.87	0.46	0.28	0.46	0.13	0.13	0.13
CO039_HUMAN	Uncharacterized protein C15orf39 OS=Homo sapiens GN=C15orf39 PE=1 SV=3	0.03	0	0.03	0	0	0	0.03
CO040_HUMAN	UPF0235 protein C15orf40 OS=Homo sapiens GN=C15orf40 PE=1 SV=2	1.11	0.45	0.45	0.2	0	0	0.2
CO041_HUMAN	Uncharacterized protein C15orf41 OS=Homo sapiens GN=C15orf41 PE=2 SV=2	0.1	0	0	0.1	0	0	0
CO057_HUMAN	Uncharacterized protein C15orf57 OS=Homo sapiens GN=C15orf57 PE=2 SV=2	0.16	0.16	0.16	0	0	0	0.35
CO059_HUMAN	UPF0583 protein C15orf59 OS=Homo sapiens GN=C15orf59 PE=2 SV=1	0	0	0	0.1	0	0	0
CO2A1_HUMAN	Collagen alpha-1(II) chain OS=Homo sapiens GN=COL2A1 PE=1 SV=3	0.02	0.02	0	0	0	0	0
CO3A1_HUMAN	Collagen alpha-1(III) chain OS=Homo sapiens GN=COL3A1 PE=1 SV=4	0	0	0	0.02	0	0	0
CO3_HUMAN	Complement C3 OS=Homo sapiens GN=C3 PE=1 SV=2	0.07	0.15	0.05	0.05	0	0	0.02
CO4A1_HUMAN	Collagen alpha-1(IV) chain OS=Homo sapiens GN=COL4A1 PE=1 SV=3	0.02	0	0	0	0	0	0
CO4A2_HUMAN	Collagen alpha-2(IV) chain OS=Homo sapiens GN=COL4A2 PE=1 SV=4	0	0.02	0	0.06	0.02	0	0
CO4A4_HUMAN	Collagen alpha-4(IV) chain OS=Homo sapiens GN=COL4A4 PE=1 SV=3	0	0	0	0.06	0	0	0
CO4A5_HUMAN	Collagen alpha-5(IV) chain OS=Homo sapiens GN=COL4A5 PE=1 SV=2	0	0	0.02	0	0	0	0
CO4A_HUMAN	Complement C4-A OS=Homo sapiens GN=C4A PE=1 SV=2	0.09	0.09	0.02	0.05	0	0	0.05
CO4B_HUMAN	Complement C4-B OS=Homo sapiens GN=C4B PE=1 SV=2	0	0	0	0	0	0.03	0
CO5A1_HUMAN	Collagen alpha-1(V) chain OS=Homo sapiens GN=COL5A1 PE=1 SV=3	0.02	0.02	0	0	0	0	0
CO5_HUMAN	Complement C5 OS=Homo sapiens GN=C5 PE=1 SV=4	0.02	0.02	0	0.02	0	0	0
CO6A1_HUMAN	Collagen alpha-1(VI) chain OS=Homo sapiens GN=COL6A1 PE=1 SV=3	0.27	0.19	0.06	0.16	0.03	0.03	0.09
CO6A2_HUMAN	Collagen alpha-2(VI) chain OS=Homo sapiens GN=COL6A2 PE=1 SV=4	0	0.03	0	0	0	0.03	0
CO7A1_HUMAN	Collagen alpha-1(VII) chain OS=Homo sapiens GN=COL7A1 PE=1 SV=2	0	0.01	0	0.04	0	0	0.02
CO9A1_HUMAN	Collagen alpha-1(IX) chain OS=Homo sapiens GN=COL9A1 PE=1 SV=3	0.04	0	0	0	0	0	0
CO9A2_HUMAN	Collagen alpha-2(IX) chain OS=Homo sapiens GN=COL9A2 PE=1 SV=2	0	0	0	0.05	0	0	0
CO9_HUMAN	Complement component C9 OS=Homo sapiens GN=C9 PE=1 SV=2	0.1	0.1	0.1	0.05	0	0	0
COA1_HUMAN	Cytochrome c oxidase assembly protein 1 homolog OS=Homo sapiens GN=COA1 PE=1 SV=1	0.45	0.2	0	0.2	0	0	0
COA3_HUMAN	Cytochrome c oxidase assembly protein 3 homolog, mitochondrial OS=Homo sapiens GN=COA3 PE=1 SV=1	2.6	0.67	0.67	0.67	0	0	0.67
COA4_HUMAN	Cytochrome c oxidase assembly factor 4 homolog, mitochondrial OS=Homo sapiens GN=COA4 PE=1 SV=2	0.78	2.18	0.78	2.18	0	0	0.78
COA5_HUMAN	Cytochrome c oxidase assembly factor 5 OS=Homo sapiens GN=COA5 PE=1 SV=1	0.4	0.97	1.77	0	0	0	0
COA6_HUMAN	Cytochrome c oxidase assembly factor 6 homolog OS=Homo sapiens GN=COA6 PE=1 SV=1	0.89	1.88	0.89	1.33	0	0	0.53
COAC_HUMAN	Phosphopantothenoylcysteine decarboxylase OS=Homo sapiens GN=PPCDC PE=1 SV=2	0.99	0.51	0.99	0.32	0.15	0	0
COASY_HUMAN	Bifunctional coenzyme A synthase OS=Homo sapiens GN=COASY PE=1 SV=4	0.51	0.85	0.29	0.59	0.36	0.51	0.59
COBA2_HUMAN	Collagen alpha-2(XI) chain OS=Homo sapiens GN=COL11A2 PE=1 SV=5	0	0	0	0.02	0	0	0
COBL1_HUMAN	Cordon-bleu protein-like 1 OS=Homo sapiens GN=COBLL1 PE=1 SV=2	0.08	0.08	0	0	0	0	0
COBL_HUMAN	Protein cordon-bleu OS=Homo sapiens GN=COBL PE=1 SV=2	0	0.07	0	0	0	0	0
COCA1_HUMAN	Collagen alpha-1(XII) chain OS=Homo sapiens GN=COL12A1 PE=1 SV=2	0.02	0.01	0.01	0.02	0	0	0.01
COCH_HUMAN	Cochlin OS=Homo sapiens GN=COCH PE=1 SV=1	0.05	0	0	0	0	0	0
COE3_HUMAN	Transcription factor COE3 OS=Homo sapiens GN=EBF3 PE=1 SV=2	0.22	0.05	0.05	0	0	0	0.1
COEA1_HUMAN	Collagen alpha-1(XIV) chain OS=Homo sapiens GN=COL14A1 PE=1 SV=3	0	0	0	0	0	0.02	0
COF1_HUMAN	Cofilin-1 OS=Homo sapiens GN=CFL1 PE=1 SV=3	9.11	18.58	5.16	85.62	2.75	2.18	31.14
COF2_HUMAN	Cofilin-2 OS=Homo sapiens GN=CFL2 PE=1 SV=1	5.09	15.34	5.09	8.98	0.93	0.93	7.47
COG1_HUMAN	Conserved oligomeric Golgi complex subunit 1 OS=Homo sapiens GN=COG1 PE=1 SV=1	0.69	0.34	0.16	0.38	0.12	0.03	0.26
COG2_HUMAN	Conserved oligomeric Golgi complex subunit 2 OS=Homo sapiens GN=COG2 PE=1 SV=1	0.53	0.53	0.17	0.47	0	0	0.21
COG3_HUMAN	Conserved oligomeric Golgi complex subunit 3 OS=Homo sapiens GN=COG3 PE=1 SV=3	0.61	0.5	0.23	0.55	0	0	0.4
COG4_HUMAN	Conserved oligomeric Golgi complex subunit 4 OS=Homo sapiens GN=COG4 PE=1 SV=3	0.77	0.48	0.15	0.9	0	0.07	0.24
COG5_HUMAN	Conserved oligomeric Golgi complex subunit 5 OS=Homo sapiens GN=COG5 PE=1 SV=3	0.51	0.32	0.19	0.57	0.04	0.11	0.15
COG6_HUMAN	Conserved oligomeric Golgi complex subunit 6 OS=Homo sapiens GN=COG6 PE=1 SV=2	0.61	0.14	0.14	0.42	0.14	0.3	0.3
COG7_HUMAN	Conserved oligomeric Golgi complex subunit 7 OS=Homo sapiens GN=COG7 PE=1 SV=1	0.74	0.5	0.16	0.45	0	0.12	0.25
COG8_HUMAN	Conserved oligomeric Golgi complex subunit 8 OS=Homo sapiens GN=COG8 PE=1 SV=2	0.38	0.38	0.1	0.59	0	0	0.2
COIA1_HUMAN	Collagen alpha-1(XVIII) chain OS=Homo sapiens GN=COL18A1 PE=1 SV=5	0.04	0.04	0	0	0	0	0
COIL_HUMAN	Coilin OS=Homo sapiens GN=COIL PE=1 SV=1	1.03	0.66	0.43	0.58	0.16	0.16	0.29
COL12_HUMAN	Collectin-12 OS=Homo sapiens GN=COLEC12 PE=1 SV=3	0.04	0.04	0	0	0.04	0	0.04
COM1_HUMAN	DNA endonuclease RBBP8 OS=Homo sapiens GN=RBBP8 PE=1 SV=2	0	0.06	0	0	0	0	0
COMD1_HUMAN	COMM domain-containing protein 1 OS=Homo sapiens GN=COMMD1 PE=1 SV=1	0.8	0.55	0.34	0.34	0	0.34	0.34
COMD2_HUMAN	COMM domain-containing protein 2 OS=Homo sapiens GN=COMMD2 PE=1 SV=2	0.73	0.73	0.15	0.51	0.15	0.15	0
COMD3_HUMAN	COMM domain-containing protein 3 OS=Homo sapiens GN=COMMD3 PE=1 SV=1	2.06	2.06	1.32	1.32	0	0	0.32
COMD4_HUMAN	COMM domain-containing protein 4 OS=Homo sapiens GN=COMMD4 PE=1 SV=1	1.03	1.03	0.33	1.03	0	0	0.15
COMD5_HUMAN	COMM domain-containing protein 5 OS=Homo sapiens GN=COMMD5 PE=1 SV=1	0.46	0.13	0.13	1.13	0	0	0.29
COMD6_HUMAN	COMM domain-containing protein 6 OS=Homo sapiens GN=COMMD6 PE=1 SV=1	0.84	1.49	0.84	0.36	0	0	0
COMD7_HUMAN	COMM domain-containing protein 7 OS=Homo sapiens GN=COMMD7 PE=1 SV=2	0.74	0.32	0.15	0.32	0	0	0
COMD8_HUMAN	COMM domain-containing protein 8 OS=Homo sapiens GN=COMMD8 PE=1 SV=1	1.09	0.55	0.34	0.55	0	0	0
COMD9_HUMAN	COMM domain-containing protein 9 OS=Homo sapiens GN=COMMD9 PE=1 SV=2	3.11	2.1	0.53	1.69	0.15	0.33	0.15
COMDA_HUMAN	COMM domain-containing protein 10 OS=Homo sapiens GN=COMMD10 PE=1 SV=1	0.97	0.5	0.31	0.31	0.15	0.31	0
COMT_HUMAN	Catechol O-methyltransferase OS=Homo sapiens GN=COMT PE=1 SV=2	1.54	4.23	0.68	1.29	0.11	0	1.81
COPA_HUMAN	Coatomer subunit alpha OS=Homo sapiens GN=COPA PE=1 SV=2	3.09	2.65	1.7	5.65	0.62	0.7	2.4
COPB2_HUMAN	Coatomer subunit beta' OS=Homo sapiens GN=COPB2 PE=1 SV=2	1.63	1.55	0.87	3.62	0.5	0.37	1.98
COPB_HUMAN	Coatomer subunit beta OS=Homo sapiens GN=COPB1 PE=1 SV=3	1.44	1.92	0.98	4.97	0.52	0.61	2.82
COPD_HUMAN	Coatomer subunit delta OS=Homo sapiens GN=ARCN1 PE=1 SV=1	2.79	2.04	1.3	1.72	0.48	0.84	2.04
COPE_HUMAN	Coatomer subunit epsilon OS=Homo sapiens GN=COPE PE=1 SV=3	5.19	4.16	1.99	15.88	0.58	0.31	30.96
COPG1_HUMAN	Coatomer subunit gamma-1 OS=Homo sapiens GN=COPG1 PE=1 SV=1	2.92	2.23	1.26	3.47	0.43	0.3	1.49
COPG2_HUMAN	Coatomer subunit gamma-2 OS=Homo sapiens GN=COPG2 PE=1 SV=1	1.58	1.05	0.86	1.75	0.39	0.43	1.12
COPRS_HUMAN	Coordinator of PRMT5 and differentiation stimulator OS=Homo sapiens GN=COPRS PE=1 SV=3	0.36	0.36	0.17	0	0	0	0
COPT1_HUMAN	High affinity copper uptake protein 1 OS=Homo sapiens GN=SLC31A1 PE=1 SV=1	0.16	0	0	0	0	0	0.16
COPZ1_HUMAN	Coatomer subunit zeta-1 OS=Homo sapiens GN=COPZ1 PE=1 SV=1	2.43	1.94	1.94	3	0.17	0.36	1.52
COQ3_HUMAN	Hexaprenyldihydroxybenzoate methyltransferase, mitochondrial OS=Homo sapiens GN=COQ3 PE=1 SV=3	0.26	0.36	0.17	0.17	0.08	0.08	0.47
COQ5_HUMAN	2-methoxy-6-polyprenyl-1,4-benzoquinol methylase, mitochondrial OS=Homo sapiens GN=COQ5 PE=1 SV=2	0.53	0.66	0.18	0.97	0.18	0.29	2.01
COQ6_HUMAN	Ubiquinone biosynthesis monooxygenase COQ6 OS=Homo sapiens GN=COQ6 PE=1 SV=2	0.75	0.28	0.21	0.13	0.13	0.13	0.28
COQ7_HUMAN	Ubiquinone biosynthesis protein COQ7 homolog OS=Homo sapiens GN=COQ7 PE=1 SV=3	0.29	0.14	0.47	0	0	0.14	0.14
COQ9_HUMAN	Ubiquinone biosynthesis protein COQ9, mitochondrial OS=Homo sapiens GN=COQ9 PE=1 SV=1	0.56	0.19	0.09	0.71	0	0	0.09
COR1A_HUMAN	Coronin-1A OS=Homo sapiens GN=CORO1A PE=1 SV=4	0.36	0.2	0.28	0.28	0	0	0.2
COR1B_HUMAN	Coronin-1B OS=Homo sapiens GN=CORO1B PE=1 SV=1	1.26	0.59	0.5	0.9	0.19	0.34	0.69
COR1C_HUMAN	Coronin-1C OS=Homo sapiens GN=CORO1C PE=1 SV=1	1.58	1.16	0.92	1.04	0.27	0.51	1.16
COR2A_HUMAN	Coronin-2A OS=Homo sapiens GN=CORO2A PE=2 SV=2	0.17	0	0	0	0	0	0
COR2B_HUMAN	Coronin-2B OS=Homo sapiens GN=CORO2B PE=2 SV=4	0	0	0	0.06	0	0	0
CORA1_HUMAN	Collagen alpha-1(XXVII) chain OS=Homo sapiens GN=COL27A1 PE=2 SV=1	0	0	0	0	0	0	0.02
CORO7_HUMAN	Coronin-7 OS=Homo sapiens GN=CORO7 PE=1 SV=2	1.07	0.83	0.33	0.61	0.21	0.14	0.33
COSA1_HUMAN	Collagen alpha-1(XXVIII) chain OS=Homo sapiens GN=COL28A1 PE=2 SV=2	0	0	0	0.06	0	0	0
COT1_HUMAN	COUP transcription factor 1 OS=Homo sapiens GN=NR2F1 PE=1 SV=1	0	0.61	0	0	0.07	0	0
COT2_HUMAN	COUP transcription factor 2 OS=Homo sapiens GN=NR2F2 PE=1 SV=1	0.41	0.62	0.23	0.15	0	0.07	0.32
COTL1_HUMAN	Coactosin-like protein OS=Homo sapiens GN=COTL1 PE=1 SV=3	2.15	3.61	0.77	7.19	0	0	2.81
COX10_HUMAN	Protoheme IX farnesyltransferase, mitochondrial OS=Homo sapiens GN=COX10 PE=1 SV=3	0	0	0	0.14	0	0	0
COX11_HUMAN	Cytochrome c oxidase assembly protein COX11, mitochondrial OS=Homo sapiens GN=COX11 PE=1 SV=3	0.49	0.64	0.1	0.49	0	0	0.1
COX14_HUMAN	Cytochrome c oxidase assembly protein COX14 OS=Homo sapiens GN=COX14 PE=1 SV=1	0.54	0	0.54	0	0	0	0
COX15_HUMAN	Cytochrome c oxidase assembly protein COX15 homolog OS=Homo sapiens GN=COX15 PE=1 SV=1	0.73	0.32	0.15	0.86	0.07	0.15	1.28
COX16_HUMAN	Cytochrome c oxidase assembly protein COX16 homolog, mitochondrial OS=Homo sapiens GN=COX16 PE=1 SV=1	0.63	0.28	0.63	0.28	0	0	0.28
COX17_HUMAN	Cytochrome c oxidase copper chaperone OS=Homo sapiens GN=COX17 PE=1 SV=2	1.23	0.49	0.49	1.23	0	0	0.49
COX18_HUMAN	Mitochondrial inner membrane protein COX18 OS=Homo sapiens GN=COX18 PE=2 SV=1	0	0.09	0	0	0.09	0	0
COX19_HUMAN	Cytochrome c oxidase assembly protein COX19 OS=Homo sapiens GN=COX19 PE=1 SV=1	0.32	0.75	0.32	0	0	0	0
COX1_HUMAN	Cytochrome c oxidase subunit 1 OS=Homo sapiens GN=MT-CO1 PE=1 SV=1	0	0	0	0.06	0	0	0
COX20_HUMAN	Cytochrome c oxidase protein 20 homolog OS=Homo sapiens GN=COX20 PE=1 SV=2	0.57	0.96	0.96	1.46	0	0	0.25
COX2_HUMAN	Cytochrome c oxidase subunit 2 OS=Homo sapiens GN=MT-CO2 PE=1 SV=1	1.65	1.08	1.08	2	0.28	0.28	1.65
COX41_HUMAN	Cytochrome c oxidase subunit 4 isoform 1, mitochondrial OS=Homo sapiens GN=COX4I1 PE=1 SV=1	3.86	1.58	0.61	3.86	0	0	1.58
COX5A_HUMAN	Cytochrome c oxidase subunit 5A, mitochondrial OS=Homo sapiens GN=COX5A PE=1 SV=2	2.59	2.59	1.08	7.96	0	0	4.18
COX5B_HUMAN	Cytochrome c oxidase subunit 5B, mitochondrial OS=Homo sapiens GN=COX5B PE=1 SV=2	1.41	3.66	0.93	4.8	0	0	3.66
COX6C_HUMAN	Cytochrome c oxidase subunit 6C OS=Homo sapiens GN=COX6C PE=1 SV=2	1.74	0.96	0.96	0.4	0.4	0	0.96
COX7C_HUMAN	Cytochrome c oxidase subunit 7C, mitochondrial OS=Homo sapiens GN=COX7C PE=1 SV=1	1.2	1.2	0.48	0	0	0	0.48
COX7R_HUMAN	Cytochrome c oxidase subunit 7A-related protein, mitochondrial OS=Homo sapiens GN=COX7A2L PE=1 SV=2	1.61	0.61	0.61	1.05	0	0	0.27
COXM1_HUMAN	COX assembly mitochondrial protein homolog OS=Homo sapiens GN=CMC1 PE=1 SV=1	1.57	1.03	1.03	0.6	0	0	0.27
COXM2_HUMAN	COX assembly mitochondrial protein 2 homolog OS=Homo sapiens GN=CMC2 PE=1 SV=1	0.85	0.85	0	0	0	0	0
CP013_HUMAN	UPF0585 protein C16orf13 OS=Homo sapiens GN=C16orf13 PE=1 SV=2	0.31	0.15	0.15	1.27	0.51	0.15	0
CP055_HUMAN	Uncharacterized protein C16orf55 OS=Homo sapiens GN=C16orf55 PE=2 SV=1	0.22	0.48	0	0	0	0	0
CP058_HUMAN	UPF0420 protein C16orf58 OS=Homo sapiens GN=C16orf58 PE=1 SV=2	0.28	0.06	0	0	0	0.06	0.13
CP059_HUMAN	Uncharacterized protein C16orf59 OS=Homo sapiens GN=C16orf59 PE=2 SV=1	0.07	0	0	0	0	0	0.07
CP062_HUMAN	UPF0505 protein C16orf62 OS=Homo sapiens GN=C16orf62 PE=1 SV=2	0.42	0.26	0.12	0.38	0.06	0.09	0.12
CP070_HUMAN	UPF0183 protein C16orf70 OS=Homo sapiens GN=C16orf70 PE=1 SV=1	0.14	0.07	0.14	0	0	0	0.07
CP072_HUMAN	UPF0472 protein C16orf72 OS=Homo sapiens GN=C16orf72 PE=1 SV=1	0.11	0	0	0	0	0	0
CP080_HUMAN	UPF0468 protein C16orf80 OS=Homo sapiens GN=C16orf80 PE=1 SV=1	0.97	0.5	0.31	1.59	0.5	0.5	0.97
CP086_HUMAN	Uncharacterized protein C16orf86 OS=Homo sapiens GN=C16orf86 PE=2 SV=2	0	0.1	0	0	0	0	0
CP087_HUMAN	UPF0547 protein C16orf87 OS=Homo sapiens GN=C16orf87 PE=1 SV=1	0.41	0	0.19	0	0	0	0
CP089_HUMAN	UPF0764 protein C16orf89 OS=Homo sapiens GN=C16orf89 PE=1 SV=2	0	0	0	0.07	0	0	0
CP110_HUMAN	Centriolar coiled-coil protein of 110 kDa OS=Homo sapiens GN=CCP110 PE=1 SV=3	0.12	0.15	0	0	0.03	0	0
CP135_HUMAN	Centrosomal protein of 135 kDa OS=Homo sapiens GN=CEP135 PE=1 SV=2	0.4	0.37	0.1	0.08	0.05	0.02	0
CP20A_HUMAN	Cytochrome P450 20A1 OS=Homo sapiens GN=CYP20A1 PE=2 SV=1	0.62	0.44	0.35	0	0	0	0.13
CP250_HUMAN	Centrosome-associated protein CEP250 OS=Homo sapiens GN=CEP250 PE=1 SV=2	0.1	0.11	0.02	0.05	0.01	0	0
CP27A_HUMAN	Sterol 26-hydroxylase, mitochondrial OS=Homo sapiens GN=CYP27A1 PE=1 SV=1	0.24	0.17	0.24	0.24	0	0.05	0.3
CP2AD_HUMAN	Cytochrome P450 2A13 OS=Homo sapiens GN=CYP2A13 PE=1 SV=3	0	0	0	0.06	0	0	0
CP2C8_HUMAN	Cytochrome P450 2C8 OS=Homo sapiens GN=CYP2C8 PE=1 SV=2	0	0.06	0	0	0	0	0
CP2C9_HUMAN	Cytochrome P450 2C9 OS=Homo sapiens GN=CYP2C9 PE=1 SV=3	0	0	0.06	0	0	0	0
CP2CI_HUMAN	Cytochrome P450 2C18 OS=Homo sapiens GN=CYP2C18 PE=1 SV=3	0.06	0.06	0	0	0	0	0
CP2J2_HUMAN	Cytochrome P450 2J2 OS=Homo sapiens GN=CYP2J2 PE=1 SV=2	0	0.06	0	0	0	0	0
CP2S1_HUMAN	Cytochrome P450 2S1 OS=Homo sapiens GN=CYP2S1 PE=2 SV=2	0	0	0	0.12	0.06	0.06	0.26
CP3A5_HUMAN	Cytochrome P450 3A5 OS=Homo sapiens GN=CYP3A5 PE=1 SV=1	0	0.06	0	0	0	0	0
CP4AM_HUMAN	Cytochrome P450 4A22 OS=Homo sapiens GN=CYP4A22 PE=1 SV=1	0.06	0	0	0	0	0	0
CP4B1_HUMAN	Cytochrome P450 4B1 OS=Homo sapiens GN=CYP4B1 PE=1 SV=2	0	0	0	0.06	0	0	0
CP4FN_HUMAN	Cytochrome P450 4F22 OS=Homo sapiens GN=CYP4F22 PE=2 SV=1	0	0	0	0.05	0	0	0.05
CP4Z1_HUMAN	Cytochrome P450 4Z1 OS=Homo sapiens GN=CYP4Z1 PE=2 SV=1	0.06	0	0	0	0	0	0
CP4Z2_HUMAN	Putative inactive cytochrome P450 family member 4Z2 OS=Homo sapiens GN=CYP4Z2P PE=5 SV=2	0	0	0.08	0	0	0	0
CP51A_HUMAN	Lanosterol 14-alpha demethylase OS=Homo sapiens GN=CYP51A1 PE=1 SV=3	1.07	1.19	0.48	1.45	0.18	0.48	2.24
CPEB2_HUMAN	Cytoplasmic polyadenylation element-binding protein 2 OS=Homo sapiens GN=CPEB2 PE=2 SV=3	0	0.1	0	0	0	0	0
CPEB3_HUMAN	Cytoplasmic polyadenylation element-binding protein 3 OS=Homo sapiens GN=CPEB3 PE=1 SV=2	0.04	0	0	0	0	0	0
CPIN1_HUMAN	Anamorsin OS=Homo sapiens GN=CIAPIN1 PE=1 SV=2	1.31	1.78	0.45	3.42	0.45	0.45	1.1
CPLX2_HUMAN	Complexin-2 OS=Homo sapiens GN=CPLX2 PE=1 SV=2	0.22	0.22	0	0	0	0	0
CPNE1_HUMAN	Copine-1 OS=Homo sapiens GN=CPNE1 PE=1 SV=1	0.81	0.54	0.62	1.12	0.24	0.46	0.71
CPNE2_HUMAN	Copine-2 OS=Homo sapiens GN=CPNE2 PE=1 SV=3	0.36	0.17	0.17	0.11	0	0	0.11
CPNE3_HUMAN	Copine-3 OS=Homo sapiens GN=CPNE3 PE=1 SV=1	1.44	1.32	0.88	1.58	0.6	0.69	1.71
CPNE7_HUMAN	Copine-7 OS=Homo sapiens GN=CPNE7 PE=2 SV=1	0.09	0	0	0.09	0	0	0
CPNE8_HUMAN	Copine-8 OS=Homo sapiens GN=CPNE8 PE=1 SV=2	0.5	0.5	0.22	0.22	0	0.11	0.29
CPNS1_HUMAN	Calpain small subunit 1 OS=Homo sapiens GN=CAPNS1 PE=1 SV=1	1.71	1.17	0.74	2.78	0.74	0.74	0.94
CPPED_HUMAN	Calcineurin-like phosphoesterase domain-containing protein 1 OS=Homo sapiens GN=CPPED1 PE=1 SV=3	1.03	0.7	1.03	1.03	0.19	0.3	2.16
CPSF1_HUMAN	Cleavage and polyadenylation specificity factor subunit 1 OS=Homo sapiens GN=CPSF1 PE=1 SV=2	0.78	0.68	0.38	0.86	0.25	0.25	0.58
CPSF2_HUMAN	Cleavage and polyadenylation specificity factor subunit 2 OS=Homo sapiens GN=CPSF2 PE=1 SV=2	1.21	1.55	0.6	1.21	0.16	0.2	0.72
CPSF3_HUMAN	Cleavage and polyadenylation specificity factor subunit 3 OS=Homo sapiens GN=CPSF3 PE=1 SV=1	1.18	0.93	0.64	0.71	0.13	0.18	0.33
CPSF4_HUMAN	Cleavage and polyadenylation specificity factor subunit 4 OS=Homo sapiens GN=CPSF4 PE=1 SV=1	1.03	1.24	0.11	0.66	0.11	0.11	1.24
CPSF5_HUMAN	Cleavage and polyadenylation specificity factor subunit 5 OS=Homo sapiens GN=NUDT21 PE=1 SV=1	1.6	3.19	1.6	9.9	1.93	2.3	5.76
CPSF6_HUMAN	Cleavage and polyadenylation specificity factor subunit 6 OS=Homo sapiens GN=CPSF6 PE=1 SV=2	0.91	1.24	0.31	1.64	0.31	0.46	1.02
CPSF7_HUMAN	Cleavage and polyadenylation specificity factor subunit 7 OS=Homo sapiens GN=CPSF7 PE=1 SV=1	0.84	1.09	0.84	0.96	0.36	0.36	0.74
CPSM_HUMAN	Carbamoyl-phosphate synthase [ammonia], mitochondrial OS=Homo sapiens GN=CPS1 PE=1 SV=2	0.39	0.26	0.19	0.26	0	0.06	0.17
CPT1A_HUMAN	Carnitine O-palmitoyltransferase 1, liver isoform OS=Homo sapiens GN=CPT1A PE=1 SV=2	0.66	0.66	0.44	1.06	0.24	0.24	0.66
CPT2_HUMAN	Carnitine O-palmitoyltransferase 2, mitochondrial OS=Homo sapiens GN=CPT2 PE=1 SV=2	1.37	0.61	0.68	1.48	0.24	0.41	1.09
CPVL_HUMAN	Probable serine carboxypeptidase CPVL OS=Homo sapiens GN=CPVL PE=1 SV=2	0.8	0.51	0.42	0.51	0.42	0.34	1.28
CPXM1_HUMAN	Probable carboxypeptidase X1 OS=Homo sapiens GN=CPXM1 PE=2 SV=2	0	0	0	0	0	0	0.04
CQ053_HUMAN	Uncharacterized protein C17orf53 OS=Homo sapiens GN=C17orf53 PE=1 SV=1	0.1	0	0	0	0	0	0
CQ059_HUMAN	Uncharacterized protein C17orf59 OS=Homo sapiens GN=C17orf59 PE=1 SV=2	0.66	0.66	0.4	0	0	0.09	0.09
CQ062_HUMAN	Uncharacterized protein C17orf62 OS=Homo sapiens GN=C17orf62 PE=1 SV=1	0.16	0.56	0.16	0	0	0	0
CQ080_HUMAN	Uncharacterized protein C17orf80 OS=Homo sapiens GN=C17orf80 PE=2 SV=2	0.21	0.05	0	0	0	0	0
CQ085_HUMAN	Uncharacterized protein C17orf85 OS=Homo sapiens GN=C17orf85 PE=1 SV=2	0.37	0.57	0.25	0.31	0	0.05	0.2
CQ089_HUMAN	Uncharacterized protein C17orf89 OS=Homo sapiens GN=C17orf89 PE=2 SV=1	0	0.44	0	0	0	0	0
CQ091_HUMAN	Putative uncharacterized protein encoded by MIR22HG OS=Homo sapiens GN=MIR22HG PE=5 SV=1	0	0	0	0	1.39	0	0
CQ096_HUMAN	Uncharacterized protein C17orf96 OS=Homo sapiens GN=C17orf96 PE=1 SV=1	0	0.08	0	0	0	0	0
CQ102_HUMAN	Uncharacterized protein C17orf102 OS=Homo sapiens GN=C17orf102 PE=2 SV=1	0.19	0.19	0.19	0	0	0	0
CQ104_HUMAN	Uncharacterized protein C17orf104 OS=Homo sapiens GN=C17orf104 PE=2 SV=3	0	0.03	0	0.03	0	0	0
CR021_HUMAN	UPF0711 protein C18orf21 OS=Homo sapiens GN=C18orf21 PE=1 SV=1	0	0.13	0	0	0	0	0
CR025_HUMAN	Uncharacterized protein C18orf25 OS=Homo sapiens GN=C18orf25 PE=1 SV=2	0.44	0.44	0	0	0	0	0
CR1_HUMAN	Complement receptor type 1 OS=Homo sapiens GN=CR1 PE=1 SV=3	0	0	0	0	0	0	0.01
CRADD_HUMAN	Death domain-containing protein CRADD OS=Homo sapiens GN=CRADD PE=1 SV=1	0.32	0.32	0	0.32	0	0	0
CRBB3_HUMAN	Beta-crystallin B3 OS=Homo sapiens GN=CRYBB3 PE=1 SV=4	0	0	0	0	0.14	0	0
CRBG3_HUMAN	Beta/gamma crystallin domain-containing protein 3 OS=Homo sapiens GN=CRYBG3 PE=2 SV=2	0	0.03	0.03	0	0	0	0
CRBN_HUMAN	Protein cereblon OS=Homo sapiens GN=CRBN PE=1 SV=1	0.36	0.36	0.2	0.13	0	0	0.06
CRCM_HUMAN	Colorectal mutant cancer protein OS=Homo sapiens GN=MCC PE=1 SV=2	0.03	0.07	0.03	0.03	0	0	0
CREB1_HUMAN	Cyclic AMP-responsive element-binding protein 1 OS=Homo sapiens GN=CREB1 PE=1 SV=2	0.29	0.29	0.09	0	0.19	0.19	0.09
CREG1_HUMAN	Protein CREG1 OS=Homo sapiens GN=CREG1 PE=1 SV=1	0	0.47	0	0.47	0	0.14	0.14
CREL1_HUMAN	Cysteine-rich with EGF-like domain protein 1 OS=Homo sapiens GN=CRELD1 PE=1 SV=3	0.22	0.22	0.07	0	0	0	0
CREL2_HUMAN	Cysteine-rich with EGF-like domain protein 2 OS=Homo sapiens GN=CRELD2 PE=1 SV=1	0.27	0.37	0.17	0	0	0	0
CREM_HUMAN	cAMP-responsive element modulator OS=Homo sapiens GN=CREM PE=1 SV=5	0.08	0.08	0	0	0	0	0
CRERF_HUMAN	CREB3 regulatory factor OS=Homo sapiens GN=CREBRF PE=1 SV=2	0	0	0	0.05	0	0	0
CREST_HUMAN	Calcium-responsive transactivator OS=Homo sapiens GN=SS18L1 PE=1 SV=2	0.08	0	0	0	0	0	0
CRF_HUMAN	Corticoliberin OS=Homo sapiens GN=CRH PE=1 SV=1	0	0	0	0.16	0	0	0
CRGD_HUMAN	Gamma-crystallin D OS=Homo sapiens GN=CRYGD PE=1 SV=3	0.56	0.34	0.16	0	0	0	0
CRIM1_HUMAN	Cysteine-rich motor neuron 1 protein OS=Homo sapiens GN=CRIM1 PE=1 SV=1	0	0	0	0.03	0	0	0
CRIP1_HUMAN	Cysteine-rich protein 1 OS=Homo sapiens GN=CRIP1 PE=1 SV=3	0	0.39	0	0	0	0	0
CRIP2_HUMAN	Cysteine-rich protein 2 OS=Homo sapiens GN=CRIP2 PE=1 SV=1	0.14	0.14	0	0.5	0	0	0.14
CRIPT_HUMAN	Cysteine-rich PDZ-binding protein OS=Homo sapiens GN=CRIPT PE=1 SV=1	1.17	0.68	0.3	0.3	0	0	0
CRKL_HUMAN	Crk-like protein OS=Homo sapiens GN=CRKL PE=1 SV=1	1.8	4.91	1.32	3.9	0.45	1.11	1.32
CRK_HUMAN	Adapter molecule crk OS=Homo sapiens GN=CRK PE=1 SV=2	3.07	2.7	1.8	3.07	0.21	0.45	1.32
CRLD2_HUMAN	Cysteine-rich secretory protein LCCL domain-containing 2 OS=Homo sapiens GN=CRISPLD2 PE=1 SV=1	0	0	0	0.06	0	0	0
CRLF3_HUMAN	Cytokine receptor-like factor 3 OS=Homo sapiens GN=CRLF3 PE=1 SV=2	0.77	0.66	0.29	0.14	0	0	0.21
CRNL1_HUMAN	Crooked neck-like protein 1 OS=Homo sapiens GN=CRNKL1 PE=1 SV=4	0.78	0.78	0.42	1.02	0.07	0.21	0.38
CROCC_HUMAN	Rootletin OS=Homo sapiens GN=CROCC PE=1 SV=1	0.09	0.12	0	0.04	0	0	0.03
CRTAP_HUMAN	Cartilage-associated protein OS=Homo sapiens GN=CRTAP PE=1 SV=1	1.1	0.97	0.22	0	0.22	0.31	0.5
CRTC1_HUMAN	CREB-regulated transcription coactivator 1 OS=Homo sapiens GN=CRTC1 PE=1 SV=2	0	0.15	0	0.05	0	0	0
CRTC2_HUMAN	CREB-regulated transcription coactivator 2 OS=Homo sapiens GN=CRTC2 PE=1 SV=2	0.14	0.3	0	0.09	0.04	0.04	0
CRTC3_HUMAN	CREB-regulated transcription coactivator 3 OS=Homo sapiens GN=CRTC3 PE=1 SV=2	0.15	0.1	0	0.1	0	0.05	0
CRYL1_HUMAN	Lambda-crystallin homolog OS=Homo sapiens GN=CRYL1 PE=1 SV=3	0.3	0.09	0.09	0.19	0	0.19	0.55
CRYM_HUMAN	Thiomorpholine-carboxylate dehydrogenase OS=Homo sapiens GN=CRYM PE=1 SV=1	0	0.1	0	0.1	0	0	0
CS010_HUMAN	UPF0556 protein C19orf10 OS=Homo sapiens GN=C19orf10 PE=1 SV=1	0.64	0.64	0.18	1.27	0	0	0.64
CS012_HUMAN	Protein C19orf12 OS=Homo sapiens GN=C19orf12 PE=1 SV=3	0	0	0.21	0.21	0	0	0.21
CS025_HUMAN	UPF0449 protein C19orf25 OS=Homo sapiens GN=C19orf25 PE=1 SV=2	1.03	1.03	0.6	0.6	0	0	0
CS043_HUMAN	Uncharacterized protein C19orf43 OS=Homo sapiens GN=C19orf43 PE=1 SV=1	0.66	0.4	0.96	0.96	0.4	0.96	0
CS044_HUMAN	Uncharacterized protein C19orf44 OS=Homo sapiens GN=C19orf44 PE=2 SV=1	0	0	0	0.05	0	0	0.05
CS047_HUMAN	Uncharacterized protein C19orf47 OS=Homo sapiens GN=C19orf47 PE=1 SV=1	0.33	0.07	0.15	0	0	0	0
CS052_HUMAN	Uncharacterized protein C19orf52 OS=Homo sapiens GN=C19orf52 PE=1 SV=2	0.9	0.53	0.38	0.9	0.24	0.38	0
CS054_HUMAN	UPF0692 protein C19orf54 OS=Homo sapiens GN=C19orf54 PE=1 SV=2	0.39	0.39	0	0	0.09	0.09	0.09
CS057_HUMAN	Uncharacterized protein C19orf57 OS=Homo sapiens GN=C19orf57 PE=1 SV=2	0.05	0	0	0	0	0	0
CS060_HUMAN	Uncharacterized protein C19orf60 OS=Homo sapiens GN=C19orf60 PE=1 SV=1	0	0.15	0	0	0	0	0
CS068_HUMAN	Uncharacterized protein C19orf68 OS=Homo sapiens GN=C19orf68 PE=1 SV=2	0	0	0	0.09	0	0	0
CSAG2_HUMAN	Chondrosarcoma-associated gene 2/3 protein OS=Homo sapiens GN=CSAG2 PE=2 SV=2	0	0	0	0.23	0	0	0
CSDE1_HUMAN	Cold shock domain-containing protein E1 OS=Homo sapiens GN=CSDE1 PE=1 SV=2	2.64	2.15	1.93	2.04	0.48	0.71	1.37
CSK21_HUMAN	Casein kinase II subunit alpha OS=Homo sapiens GN=CSNK2A1 PE=1 SV=1	3.4	2.56	1.88	1.33	0.53	0.89	1.02
CSK22_HUMAN	Casein kinase II subunit alpha' OS=Homo sapiens GN=CSNK2A2 PE=1 SV=1	2.99	1.93	1.16	6.37	0.36	0.59	2.17
CSK23_HUMAN	Casein kinase II subunit alpha 3 OS=Homo sapiens GN=CSNK2A3 PE=1 SV=2	0	0	0	1.33	0	0	0
CSK2B_HUMAN	Casein kinase II subunit beta OS=Homo sapiens GN=CSNK2B PE=1 SV=1	1.1	1.38	0.64	1.38	0.13	0.13	1.1
CSKI1_HUMAN	Caskin-1 OS=Homo sapiens GN=CASKIN1 PE=1 SV=1	0	0	0.02	0.02	0	0	0
CSKI2_HUMAN	Caskin-2 OS=Homo sapiens GN=CASKIN2 PE=1 SV=2	0.16	0.03	0	0.08	0	0.03	0
CSKP_HUMAN	Peripheral plasma membrane protein CASK OS=Homo sapiens GN=CASK PE=1 SV=3	0.58	0.2	0.1	0.13	0.1	0.03	0.13
CSK_HUMAN	Tyrosine-protein kinase CSK OS=Homo sapiens GN=CSK PE=1 SV=1	1.71	1.39	0.86	1.25	0.28	0.28	2.27
CSMD2_HUMAN	CUB and sushi domain-containing protein 2 OS=Homo sapiens GN=CSMD2 PE=1 SV=2	0	0	0	0	0.01	0	0
CSMT1_HUMAN	Protein CCSMST1 OS=Homo sapiens GN=CCSMST1 PE=2 SV=1	0.5	0.22	0.22	0.22	0	0	0
CSN1_HUMAN	COP9 signalosome complex subunit 1 OS=Homo sapiens GN=GPS1 PE=1 SV=4	1.64	1.49	0.87	1.1	0.19	0.41	1.64
CSN2_HUMAN	COP9 signalosome complex subunit 2 OS=Homo sapiens GN=COPS2 PE=1 SV=1	1.68	1.37	0.74	3.13	0.36	0.74	5.76
CSN3_HUMAN	COP9 signalosome complex subunit 3 OS=Homo sapiens GN=COPS3 PE=1 SV=3	1.52	0.93	0.59	0.39	0.14	0.14	0.49
CSN4_HUMAN	COP9 signalosome complex subunit 4 OS=Homo sapiens GN=COPS4 PE=1 SV=1	4.55	3.22	1.61	0.62	0.73	0.85	2.21
CSN5_HUMAN	COP9 signalosome complex subunit 5 OS=Homo sapiens GN=COPS5 PE=1 SV=4	1.98	1.52	1.13	3.54	0.4	0.52	1.74
CSN6_HUMAN	COP9 signalosome complex subunit 6 OS=Homo sapiens GN=COPS6 PE=1 SV=1	1.6	2.09	0.54	2.37	0.54	0.68	2.37
CSN7A_HUMAN	COP9 signalosome complex subunit 7a OS=Homo sapiens GN=COPS7A PE=1 SV=1	1.82	1.82	0.51	1.82	0.37	0.37	3.27
CSN7B_HUMAN	COP9 signalosome complex subunit 7b OS=Homo sapiens GN=COPS7B PE=1 SV=1	1.09	1.33	0.37	2.2	0.37	0.53	1.88
CSN8_HUMAN	COP9 signalosome complex subunit 8 OS=Homo sapiens GN=COPS8 PE=1 SV=1	1.56	1.24	1.93	3.38	0.31	0.71	1.56
CSPG4_HUMAN	Chondroitin sulfate proteoglycan 4 OS=Homo sapiens GN=CSPG4 PE=1 SV=2	0.01	0.01	0	0	0	0	0.01
CSPP1_HUMAN	Centrosome and spindle pole-associated protein 1 OS=Homo sapiens GN=CSPP1 PE=1 SV=4	0	0.05	0	0.05	0.02	0	0
CSR2B_HUMAN	Cysteine-rich protein 2-binding protein OS=Homo sapiens GN=CSRP2BP PE=1 SV=3	0	0.07	0	0.04	0	0	0
CSRP1_HUMAN	Cysteine and glycine-rich protein 1 OS=Homo sapiens GN=CSRP1 PE=1 SV=3	0.55	0.16	0	0.34	0	0	0
CSRP2_HUMAN	Cysteine and glycine-rich protein 2 OS=Homo sapiens GN=CSRP2 PE=1 SV=3	1.72	2.13	0.33	0.77	0.53	0.53	0.53
CSTF1_HUMAN	Cleavage stimulation factor subunit 1 OS=Homo sapiens GN=CSTF1 PE=1 SV=1	1.48	0.68	0.38	1.04	0.3	0.48	1.33
CSTF2_HUMAN	Cleavage stimulation factor subunit 2 OS=Homo sapiens GN=CSTF2 PE=1 SV=1	0.98	1.2	0.44	1.2	0.52	0.3	0.88
CSTF3_HUMAN	Cleavage stimulation factor subunit 3 OS=Homo sapiens GN=CSTF3 PE=1 SV=1	1.25	1.34	0.72	1.94	0.21	0.36	1.16
CSTFT_HUMAN	Cleavage stimulation factor subunit 2 tau variant OS=Homo sapiens GN=CSTF2T PE=1 SV=1	1	0.81	0.35	0.81	0	0.22	0
CSTN1_HUMAN	Calsyntenin-1 OS=Homo sapiens GN=CLSTN1 PE=1 SV=1	0.03	0.03	0	0	0	0	0
CSTN3_HUMAN	Calsyntenin-3 OS=Homo sapiens GN=CLSTN3 PE=1 SV=1	0.03	0	0	0	0	0	0
CT024_HUMAN	Uncharacterized protein C20orf24 OS=Homo sapiens GN=C20orf24 PE=2 SV=1	0.22	0	0	0	0	0	0
CT026_HUMAN	Uncharacterized protein C20orf26 OS=Homo sapiens GN=C20orf26 PE=2 SV=3	0	0	0.02	0.02	0	0	0
CT027_HUMAN	UPF0687 protein C20orf27 OS=Homo sapiens GN=C20orf27 PE=1 SV=3	0.61	1.21	0.61	0.89	0.37	0.17	0.17
CT112_HUMAN	Uncharacterized protein C20orf112 OS=Homo sapiens GN=C20orf112 PE=1 SV=2	0.14	0.4	0	0	0	0	0
CT166_HUMAN	Uncharacterized protein C20orf166 OS=Homo sapiens GN=C20orf166 PE=2 SV=1	0	0	0	0	0.27	0	0
CT195_HUMAN	Uncharacterized protein C20orf195 OS=Homo sapiens GN=C20orf195 PE=2 SV=1	0.09	0	0	0	0	0	0
CT2NL_HUMAN	CTTNBP2 N-terminal-like protein OS=Homo sapiens GN=CTTNBP2NL PE=1 SV=2	0.65	1.27	0.2	0.37	0	0	0
CTBL1_HUMAN	Beta-catenin-like protein 1 OS=Homo sapiens GN=CTNNBL1 PE=1 SV=1	0.98	1.19	0.48	1.79	0.22	0.28	0.98
CTBP1_HUMAN	C-terminal-binding protein 1 OS=Homo sapiens GN=CTBP1 PE=1 SV=2	0.7	0.7	0.3	0.82	0.39	0.39	1.22
CTBP2_HUMAN	C-terminal-binding protein 2 OS=Homo sapiens GN=CTBP2 PE=1 SV=1	0.79	0.38	0.57	0.79	0.21	0.47	1.32
CTCF_HUMAN	Transcriptional repressor CTCF OS=Homo sapiens GN=CTCF PE=1 SV=1	0.36	0.36	0.08	0.31	0	0	0.12
CTDP1_HUMAN	RNA polymerase II subunit A C-terminal domain phosphatase OS=Homo sapiens GN=CTDP1 PE=1 SV=3	0.24	0.2	0.17	0.06	0.03	0.06	0.06
CTDS1_HUMAN	Carboxy-terminal domain RNA polymerase II polypeptide A small phosphatase 1 OS=Homo sapiens GN=CTDSP1 PE=1 SV=1	0.11	0.11	0	0.11	0	0	0.38
CTDSL_HUMAN	CTD small phosphatase-like protein OS=Homo sapiens GN=CTDSPL PE=1 SV=2	0.11	0.11	0	0	0	0	0.22
CTF18_HUMAN	Chromosome transmission fidelity protein 18 homolog OS=Homo sapiens GN=CHTF18 PE=1 SV=1	0.43	0.31	0.13	0.47	0.09	0.03	0.2
CTF8A_HUMAN	Chromosome transmission fidelity protein 8 homolog isoform 2 OS=Homo sapiens GN=CHTF8 PE=1 SV=1	0	0.06	0.06	0.06	0.06	0.06	0.13
CTF8_HUMAN	Chromosome transmission fidelity protein 8 homolog OS=Homo sapiens GN=CHTF8 PE=1 SV=1	0.58	0.26	0.26	0	0	0	0
CTGE5_HUMAN	cTAGE family member 5 OS=Homo sapiens GN=CTAGE5 PE=1 SV=4	0.37	0.42	0.24	0.11	0	0	0.04
CTIF_HUMAN	CBP80/20-dependent translation initiation factor OS=Homo sapiens GN=CTIF PE=1 SV=1	0.21	0.39	0.1	0.05	0	0	0
CTL1_HUMAN	Choline transporter-like protein 1 OS=Homo sapiens GN=SLC44A1 PE=1 SV=1	0.19	0.24	0.14	0.04	0	0	0.09
CTL2_HUMAN	Choline transporter-like protein 2 OS=Homo sapiens GN=SLC44A2 PE=1 SV=3	0.04	0.04	0	0.04	0	0	0
CTNA1_HUMAN	Catenin alpha-1 OS=Homo sapiens GN=CTNNA1 PE=1 SV=1	1.97	1.7	0.96	2.48	0.42	0.38	1.45
CTNA2_HUMAN	Catenin alpha-2 OS=Homo sapiens GN=CTNNA2 PE=1 SV=5	0	0.48	0	0	0	0	0
CTNA3_HUMAN	Catenin alpha-3 OS=Homo sapiens GN=CTNNA3 PE=1 SV=2	0	0	0.07	0	0	0	0
CTNB1_HUMAN	Catenin beta-1 OS=Homo sapiens GN=CTNNB1 PE=1 SV=1	1.11	1.28	0.69	1.11	0.21	0.25	0.69
CTND1_HUMAN	Catenin delta-1 OS=Homo sapiens GN=CTNND1 PE=1 SV=1	2	1.58	0.66	0.92	0.19	0.27	0.61
CTND2_HUMAN	Catenin delta-2 OS=Homo sapiens GN=CTNND2 PE=1 SV=3	0	0	0	0.05	0	0	0
CTNL1_HUMAN	Alpha-catulin OS=Homo sapiens GN=CTNNAL1 PE=1 SV=2	0.42	0.42	0.08	0.42	0.04	0.04	0.12
CTR1_HUMAN	High affinity cationic amino acid transporter 1 OS=Homo sapiens GN=SLC7A1 PE=1 SV=1	0.1	0.26	0	0.26	0	0.05	0.15
CTR2_HUMAN	Low affinity cationic amino acid transporter 2 OS=Homo sapiens GN=SLC7A2 PE=1 SV=2	0.09	0.09	0.05	0	0	0	0
CTR3_HUMAN	Cationic amino acid transporter 3 OS=Homo sapiens GN=SLC7A3 PE=1 SV=1	0.1	0	0	0	0	0	0
CTR9_HUMAN	RNA polymerase-associated protein CTR9 homolog OS=Homo sapiens GN=CTR9 PE=1 SV=1	0.5	0.3	0.27	0.47	0.05	0.07	0.27
CTRO_HUMAN	Citron Rho-interacting kinase OS=Homo sapiens GN=CIT PE=1 SV=2	0.25	0.12	0.1	0.13	0.01	0.03	0.04
CTSL2_HUMAN	CTD small phosphatase-like protein 2 OS=Homo sapiens GN=CTDSPL2 PE=1 SV=2	0.35	0.43	0.27	0.06	0.06	0.06	0.27
CTSR3_HUMAN	Cation channel sperm-associated protein 3 OS=Homo sapiens GN=CATSPER3 PE=1 SV=1	0	0	0	0	0	0	0.07
CTTB2_HUMAN	Cortactin-binding protein 2 OS=Homo sapiens GN=CTTNBP2 PE=1 SV=1	0	0	0	0	0	0	0.04
CTU1_HUMAN	Cytoplasmic tRNA 2-thiolation protein 1 OS=Homo sapiens GN=CTU1 PE=1 SV=1	0.41	0.53	0	0.19	0.19	0.09	0.09
CTU2_HUMAN	Cytoplasmic tRNA 2-thiolation protein 2 OS=Homo sapiens GN=CTU2 PE=1 SV=1	0.65	0.4	0.12	0.12	0.06	0	0.18
CU002_HUMAN	Protein C21orf2 OS=Homo sapiens GN=C21orf2 PE=1 SV=1	0.25	0.73	0	0	0	0	0
CU025_HUMAN	C2 domain-containing protein 2 OS=Homo sapiens GN=C2CD2 PE=1 SV=2	0	0	0	0.09	0	0	0.04
CU059_HUMAN	Uncharacterized protein C21orf59 OS=Homo sapiens GN=C21orf59 PE=1 SV=1	0.77	1.35	0.21	0.94	0.1	0	1.83
CU074_HUMAN	Putative uncharacterized protein encoded by LINC00308 OS=Homo sapiens GN=LINC00308 PE=5 SV=2	0	0	0	0.59	0	0	0
CU129_HUMAN	Putative uncharacterized protein encoded by LINC00479 OS=Homo sapiens GN=LINC00479 PE=5 SV=2	0.22	0	0.22	0.48	0	0	0
CUBN_HUMAN	Cubilin OS=Homo sapiens GN=CUBN PE=1 SV=5	0	0	0.01	0	0	0	0
CUED1_HUMAN	CUE domain-containing protein 1 OS=Homo sapiens GN=CUEDC1 PE=1 SV=1	0.25	0.25	0	0	0	0	0
CUED2_HUMAN	CUE domain-containing protein 2 OS=Homo sapiens GN=CUEDC2 PE=1 SV=1	0.1	0.1	0.1	0	0	0	0
CUL1_HUMAN	Cullin-1 OS=Homo sapiens GN=CUL1 PE=1 SV=2	1.62	1.27	0.65	3.31	0.19	0.19	1.35
CUL2_HUMAN	Cullin-2 OS=Homo sapiens GN=CUL2 PE=1 SV=2	1.08	0.67	0.25	1.41	0.25	0.2	0.67
CUL3_HUMAN	Cullin-3 OS=Homo sapiens GN=CUL3 PE=1 SV=2	1.46	0.91	0.65	1.94	0.24	0.15	0.84
CUL4A_HUMAN	Cullin-4A OS=Homo sapiens GN=CUL4A PE=1 SV=3	0.93	0.67	0.44	0.55	0.12	0.08	0.44
CUL4B_HUMAN	Cullin-4B OS=Homo sapiens GN=CUL4B PE=1 SV=4	1.52	1.52	0.8	2.23	0.32	0.24	1.3
CUL5_HUMAN	Cullin-5 OS=Homo sapiens GN=CUL5 PE=1 SV=4	1.33	0.95	0.37	1.41	0.19	0.07	0.42
CUL7_HUMAN	Cullin-7 OS=Homo sapiens GN=CUL7 PE=1 SV=2	0	0.05	0	0	0	0	0
CUL9_HUMAN	Cullin-9 OS=Homo sapiens GN=CUL9 PE=1 SV=2	0.01	0	0	0.01	0	0	0
CUTA_HUMAN	Protein CutA OS=Homo sapiens GN=CUTA PE=1 SV=2	1.24	0.91	0	1.24	0	0	0.62
CUTC_HUMAN	Copper homeostasis protein cutC homolog OS=Homo sapiens GN=CUTC PE=1 SV=1	1.1	0.7	0.24	0.37	0	0.11	0.7
CUX1_HUMAN	Homeobox protein cut-like 1 OS=Homo sapiens GN=CUX1 PE=1 SV=3	0.34	0.42	0.13	0.04	0.04	0.02	0.04
CUX2_HUMAN	Homeobox protein cut-like 2 OS=Homo sapiens GN=CUX2 PE=1 SV=4	0.06	0.04	0	0	0	0	0.02
CV039_HUMAN	UPF0545 protein C22orf39 OS=Homo sapiens GN=C22orf39 PE=2 SV=2	0.2	0.2	0	0	0	0	0
CWC15_HUMAN	Spliceosome-associated protein CWC15 homolog OS=Homo sapiens GN=CWC15 PE=1 SV=2	0.42	0.6	0.13	0.6	0	0.13	0
CWC22_HUMAN	Pre-mRNA-splicing factor CWC22 homolog OS=Homo sapiens GN=CWC22 PE=1 SV=3	0.68	0.28	0.24	0.2	0.06	0.03	0.16
CWC25_HUMAN	Pre-mRNA-splicing factor CWC25 homolog OS=Homo sapiens GN=CWC25 PE=1 SV=1	0.14	0.38	0	0.07	0	0	0
CWC27_HUMAN	Peptidyl-prolyl cis-trans isomerase CWC27 homolog OS=Homo sapiens GN=CWC27 PE=1 SV=1	0.81	0.81	0.34	0.43	0.06	0.06	0.51
CX030_HUMAN	Putative uncharacterized protein CXorf30 OS=Homo sapiens GN=CXorf30 PE=2 SV=2	0.05	0.05	0.05	0.05	0	0	0
CX038_HUMAN	Uncharacterized protein CXorf38 OS=Homo sapiens GN=CXorf38 PE=1 SV=1	0.53	0.29	0.09	0.4	0.18	0.18	0.09
CX049_HUMAN	Putative uncharacterized protein CXorf49 OS=Homo sapiens GN=CXorf49 PE=5 SV=2	0	0	0	0.06	0	0	0
CX04A_HUMAN	Protein CXorf40A OS=Homo sapiens GN=CXorf40A PE=1 SV=2	0	0	0	0.19	0.19	0	0
CX04B_HUMAN	Protein CXorf40B OS=Homo sapiens GN=CXorf40B PE=2 SV=1	0	0.19	0	0	0	0	0
CX056_HUMAN	UPF0428 protein CXorf56 OS=Homo sapiens GN=CXorf56 PE=1 SV=1	0.83	1.07	0.13	0.27	0	0.13	0.13
CX057_HUMAN	Uncharacterized protein CXorf57 OS=Homo sapiens GN=CXorf57 PE=1 SV=2	0.48	0.26	0.14	0.26	0.03	0.1	0.18
CX6A1_HUMAN	Cytochrome c oxidase subunit 6A1, mitochondrial OS=Homo sapiens GN=COX6A1 PE=1 SV=4	0	0	0.28	0.65	0	0	0.28
CX6B1_HUMAN	Cytochrome c oxidase subunit 6B1 OS=Homo sapiens GN=COX6B1 PE=1 SV=2	3.19	3.19	2.15	8.89	0	0	0.77
CX7A2_HUMAN	Cytochrome c oxidase subunit 7A2, mitochondrial OS=Homo sapiens GN=COX7A2 PE=1 SV=1	0.87	0.87	0.37	2.51	0	0.37	0.87
CXA1_HUMAN	Gap junction alpha-1 protein OS=Homo sapiens GN=GJA1 PE=1 SV=2	0.16	0	0	0	0	0	0
CXA3_HUMAN	Gap junction alpha-3 protein OS=Homo sapiens GN=GJA3 PE=1 SV=4	0	0	0	0	0	0	0.07
CXAR_HUMAN	Coxsackievirus and adenovirus receptor OS=Homo sapiens GN=CXADR PE=1 SV=1	1.02	0.73	0.37	0.08	0	0.17	0.6
CXB2_HUMAN	Gap junction beta-2 protein OS=Homo sapiens GN=GJB2 PE=1 SV=3	0	0.12	0	0	0	0	0
CXCL3_HUMAN	C-X-C motif chemokine 3 OS=Homo sapiens GN=CXCL3 PE=1 SV=1	0	0	0	0.3	0	0	0
CXCL6_HUMAN	C-X-C motif chemokine 6 OS=Homo sapiens GN=CXCL6 PE=1 SV=4	0	0	0	0	0.28	0	0
CXCR4_HUMAN	C-X-C chemokine receptor type 4 OS=Homo sapiens GN=CXCR4 PE=1 SV=1	0	0	0	0	0.17	0	0.08
[truncated: 7,794 more rows]
