# Supplementary material for: Systematic comparison between SDS-PAGE/RPLC and high-/low-pH RPLC coupled tandem mass spectrometry strategies in a whole proteome analysis
Source: Royal Society of Chemistry journal article supplement (doi:10.1039/c4an02119c), 2014-12-17
Supplement: c4an02119c4.xlsx [file c4an02119c4.xlsx]

## Sheet: Sheet1
PTM_Name	PTM_Position	Exp 3	Exp 1	Exp 5	Exp 7
Deamidation	NQ	19864	52236	5682	13332
Oxidation	M	2430	5016	10655	11668
Carbamidomethyl	DEHK,N-term	56401	33143	6875	8192
Carbamidomethyl	C	36038	24892	2014	7796
Propionamide	C	130	55	1739	6170
Pyro-glu from Q	N-term	4469	7270	3151	4206
Acetylation	Protein N-term	6861	5551	1935	3088
Methyl ester	DE,C-term	3221	3043	718	1231
Ubiquitin	CKST	7642	3265	178	888
Hydroxylation	DKNPRY	693	975	1140	815
Carboxymethyl	C	2015	3490	110	648
Acetylation	N-term	2461	3627	220	519
Oxidation	HW	242	228	533	494
Deamidation	R	458	505	203	473
Phosphorylation	STY	1472	760	187	418
Dehydration	DSTY,C-term	1595	2789	342	412
Formylation	K,N-term	689	542	613	406
Ammonium	DE,C-term	584		88	379
Sulfation	STY	53	59	457	319
Carbamylation	K,N-term	16209	14937	1551	283
Pyro-cmC	N-term	2654	3935	186	277
Acetylation	K	466	641	81	272
Dihydroxy	CFKPRWY	366	219	356	249
Didehydro	STY,C-term	71	50	207	214
Ammonia loss	N	438	988	165	209
Ethyl	DEK,N-term,C-term	206	172	70	180
Sulphone	M	16	40	422	166
Amidine	K,N-term	106	116	6	152
Pyro-glu from E	N-term	383	458	81	129
AEC-MAEC	ST	283	298	19	122
Carbofuran	S	228	180	34	119
Amidation	C-term	97	213	522	112
Dethiomethyl	M	1413	1212	128	106
DehydroalaC	C	109	1249	123	106
Propionamide	K,N-term	64	95	42	89
Sodium	DE,C-term	189	213	46	88
Biotin	K,N-term	133	161	50	73
Methylation	CKRST,N-term				73
Guanidination	K	42	47	15	70
Carboxylation	DKW	357	426	84	67
Fphe	FWY	51	16		67
DSP	ACEFGHIKLMNPQSTVWY				66
Cysteic_acid	C	5	4	67	60
Cation:Fe[II]	DE				55
Dimethylation	NR	113	74	38	54
Carboxymethyl	K,N-term	693			52
Diethylation	K,N-term	131			48
glycidamide	K,N-term	27	37	60	48
Lysaminoadipicsealde	K	20	6	10	47
Formylation	Protein N-term	68	23	35	45
EtOH	C	129	112	8	42
Hexose	NSY	41	41		39
Carboxylation	E	223	365	19	37
HexNAc	ST	86	32	14	36
Croton	CHK	13			36
ISD_z+2_ion	N-term	65	52	14	34
MethylamineST	ST	15	35	8	34
EtOH	KR	33	25	29	32
Dehydro	C	6	4	17	32
Maleimide	CK	231	187	5	28
Kynurenin	W	6		27	28
NEMhyd	CK	6	16		28
GlycerylPE	E		71	4	28
ser_thr_DAET	ST		6	26	28
O-Diisopropylphosphate	KSTY	25	26		24
cGMP+RMP-loss	CS	17	6		24
SMA	K,N-term				24
NDA	K,N-term	115			23
Propionald+40	HK	36	46	4	21
Delta:H(5)C(2)	P	28	6	9	21
Phosphorylation	CDHR				21
HexNAc	N	36	13	5	20
PEITC	CK,N-term	22	13		20
SNO	C	21	10		19
Methyl+Deamidated	NQ	14	24		19
BITC	K,N-term		29		19
Fuc	ST	41	15	9	18
Ethyl+Deamidated	NQ	21	15		18
HexN	KNT			12	18
Myristoylation	CK,N-term		18	11	18
Oxoalanine	C				18
Im_biotin	K,N-term	178	131		17
MercaptoEthanol	ST	47	40	4	17
Benzoyl	K,N-term				17
O-Diethylphosphate	CHKSTY	18			16
Aminotyrosine	Y	15	14	6	16
CarbamidomethylDTT	C	9		11	16
Hydroxycinnamyl	C			25	16
O-Isopropylphosphorylation	STY				16
Cyano	C	17	12	40	15
Beta-methylthiolation	C	13	31	6	15
N-glucuronyl	S				15
Ethanolamine	DE,C-term	53			14
NMMhyd	C	4	6		14
NMM	CK		6		14
Deoxy	DT	19	33		13
O-Isopropylmethylphosphonate	STY	19	6		13
Glycosyl	P	15	4		13
Aminoadipic	K	10	4		13
Pyroglutamic	P	8	12	139	13
Hep	KNQR				13
Methylmalonylation	S	71	31		12
Pyridylacetyl	K,N-term	9	19		12
Hex1HexNAc1	ST				12
G-H1	R	22	19		11
Acetyl	HSTY	19			11
Cation:Ni[II]	DE		10	16	11
Argglutamicsealde	R	6	4	33	10
Ethoxyformyl	H	6	4		10
4-ONE+Delta:H(-2)O(-1)	K				10
Homoserine lactone	C-term	44	18	8	9
Propargylamine	DE,C-term	10	32		9
Pyrrolidinone	P	10	4	26	9
Acetald+26	HK				9
Cation:Li	DE		20		9
Hex	K,N-term				9
LG-Hlactam-R	R				9
LG-anhyropyrrole	K,N-term				9
Nitro	WY				9
ethylamino	S	11	16		8
Trimethyl-OH	K	8	5		8
HNE-Delta:H(2)O	CK	6	6		8
Carboxyethyl	K		6		8
Palmitoylation	CKST				8
glucosone	R		4		8
LG-lactam-R	R	17	4		7
LG-pyrrole	K,N-term	8			7
Galactosyl	K	5			7
Trifluoro	L	5			7
BHT	CHK		4		7
HydroxymethylOP	K		4		7
Methylphosphonate	STY		7		7
O-Pinacolylmethylphosphonate	HKS				7
SeMet	CM				7
Trimethylation	R,N-term				7
Cation:Ca[II]	DE	76	5	4	6
Cation:K	DE,C-term	38			6
Malonyl	CS	10	22		6
PyMIC	N-term	7	5		6
MDA62	K				6
Palmitoleyl	CS				6
SecCarbamidomethyl	C			27	6
Sulfation	C				6
S-Eth	S	44	16		5
Met->Aha	M	12	7		5
PET	ST	9	8		5
CAF	N-term	8	8		5
Octanoyl	ST	5	11		5
Cation:Ag	DE,C-term				5
Cys->methylaminoAla	C				5
Cysteinyl	C				5
Cytopiloyne+H2O	KY,N-term				5
Me-pyrroline	K				5
Menadione-HQ	CK		8		5
HNE	HK	36			4
Pyruv-iminyl	K	17	8		4
Hydroxymethyl	N	9	6	5	4
thioacylPA	K	7	7	9	4
Diphthamide	H	4			4
Oxolactone	W	4			4
3-deoxyglucosone	R				4
DTT_C	C				4
HMVK86	C				4
O-Ethylphosphate	ST				4
Phosphopropargyl	ST				4
PyridoxalPhosphate	K				4
Pyruvic acid	N-term			6	4
TNBS	N-term				4
Thio-phospho	ST				4
dichlorination	Y				4
Cation:Fe[II]	DE,C-term	148	108	167
Methylation	CHKRST,N-term	113	74	50
DSP	AEFGIKLMNPQRTV	46
Iodination	Y	45
HexN	KNTW	40	22
BITC	CK,N-term	37
SMA	N-term	36	32	8
Homoserine	C-term	35	60
Hex	CKT,N-term	25
Cation:Ni[II]	DE,C-term	24
O-Isopropylphosphorylation	ST	19	4
Lipoyl	K	17	10
TNBS	K,N-term	17	27	10
Bromo	FHW	14
HexNAc1dHex1	N	14
LG-anhydrolactam	N-term	13	12
Thio-phospho	STY	13	29
Arg->Orn	R	12	31
Cation:Ag	DE	12		5
DFDNB	KNQR	12
Acetald+26	K	11
Bacillosamine	N	11	5
Myristoylation	CK	10
Quinone	Y	10	6
Benzoyl	N-term	9	9	5
Dihydroxyimidazolidine	R	9		5
Hep	KQRS	9
Phosphopropargyl	STY	9
Piperidine	K,N-term	9
2-succinyl	C	8	38
BiotinPEO-amine	DE	8
Cation:Cu	DE,C-term	8
Cation:Li	DE,C-term	8
Glu	E	8
Menadione-Q	K	8
Phosphorylation	CDH	8		18
p-GlcNAc	ST	8
Arg2HPG	R	7	4
B-methylthiol	DN	7	14
Pyrrole	K	7
S-pyridylethyl	C	7	8	7
4-ONE+Delta:H(-2)O(-1)	CK	6	11
Argbiotinhydrazide	R	6
CarboxymethylDTT	C	6
DehydroalaY	Y	6
O-Ethylphosphate	STY	6	7
Trimethylation	K,N-term	6
sulfo+amino	Y	6
4-ONE	CHK	5
DimethylArsino	C	5
Hypusine	K	5	5
3sulfo	N-term	4	13
ADP-Ribose	ENS	4
Arg->Npo	R	4	7
Cytopiloyne	S,N-term	4
DTT_ST	ST	4
DeStreak	C	4
Decanoyl	ST	4
FMN	ST	4
Nitro	Y	4
O-Pinacolylmethylphosphonate	HKSY	4
Acetyl	CHSTY		25
Ammonia loss	Protein N-term		4
Ammonium	DE		34
BITC	N-term			8
Bromo	FW		4
Carboxymethyl	N-term			31
Carboxymethyl	W,N-term		2185
Cation:K	DE		8
Cation:Li	E			4
Croton	CK			7
Cytopiloyne	K			5
Cytopiloyne	Y,N-term		4
DHP	C		8
DSP	ACDEFGIKLNPQRSTV		96
DSP	CDFGHILPVY			25
Dansyl	N-term		4
Dehydration	N-term		6
Diethylation	N-term		55	10
EDT	S			4
Ethanolamine	DE		39
Fphe	FY			18
GluGluGlu	E		13
HNE	K		46
Hep	NT		5
Hex	R,N-term		16
Hexose	NS			11
Im_biotin	N-term			5
Iodination	HY		19	9
LG-pyrrole	N-term		5
LTP1-lipid	D		5
Menadione-Q	CK		7
Methyl+Deamidated	Q			5
NDA	N-term		44	6
O-Diethylphosphate	KSY			5
O-Diethylphosphate	ST		13
O-Pinacolylmethylphosphonate	HTY		4
OxPro	P		7
PEITC	N-term			10
Palmitoylation	ST		4
Persulfide	CD			15
Persulfide	D		5
Phosphopropargyl	SY		5
Phosphorylation	DHR		11
Piperidine	N-term		4
Quinone	WY			4
Trimethylation	N-term		4	5
