# Supplementary figures and images for: Systematic comparison between SDS-PAGE/RPLC and high-/low-pH RPLC coupled tandem mass spectrometry strategies in a whole proteome analysis
Source: Royal Society of Chemistry journal article supplement (doi:10.1039/c4an02119c), 2014-12-17

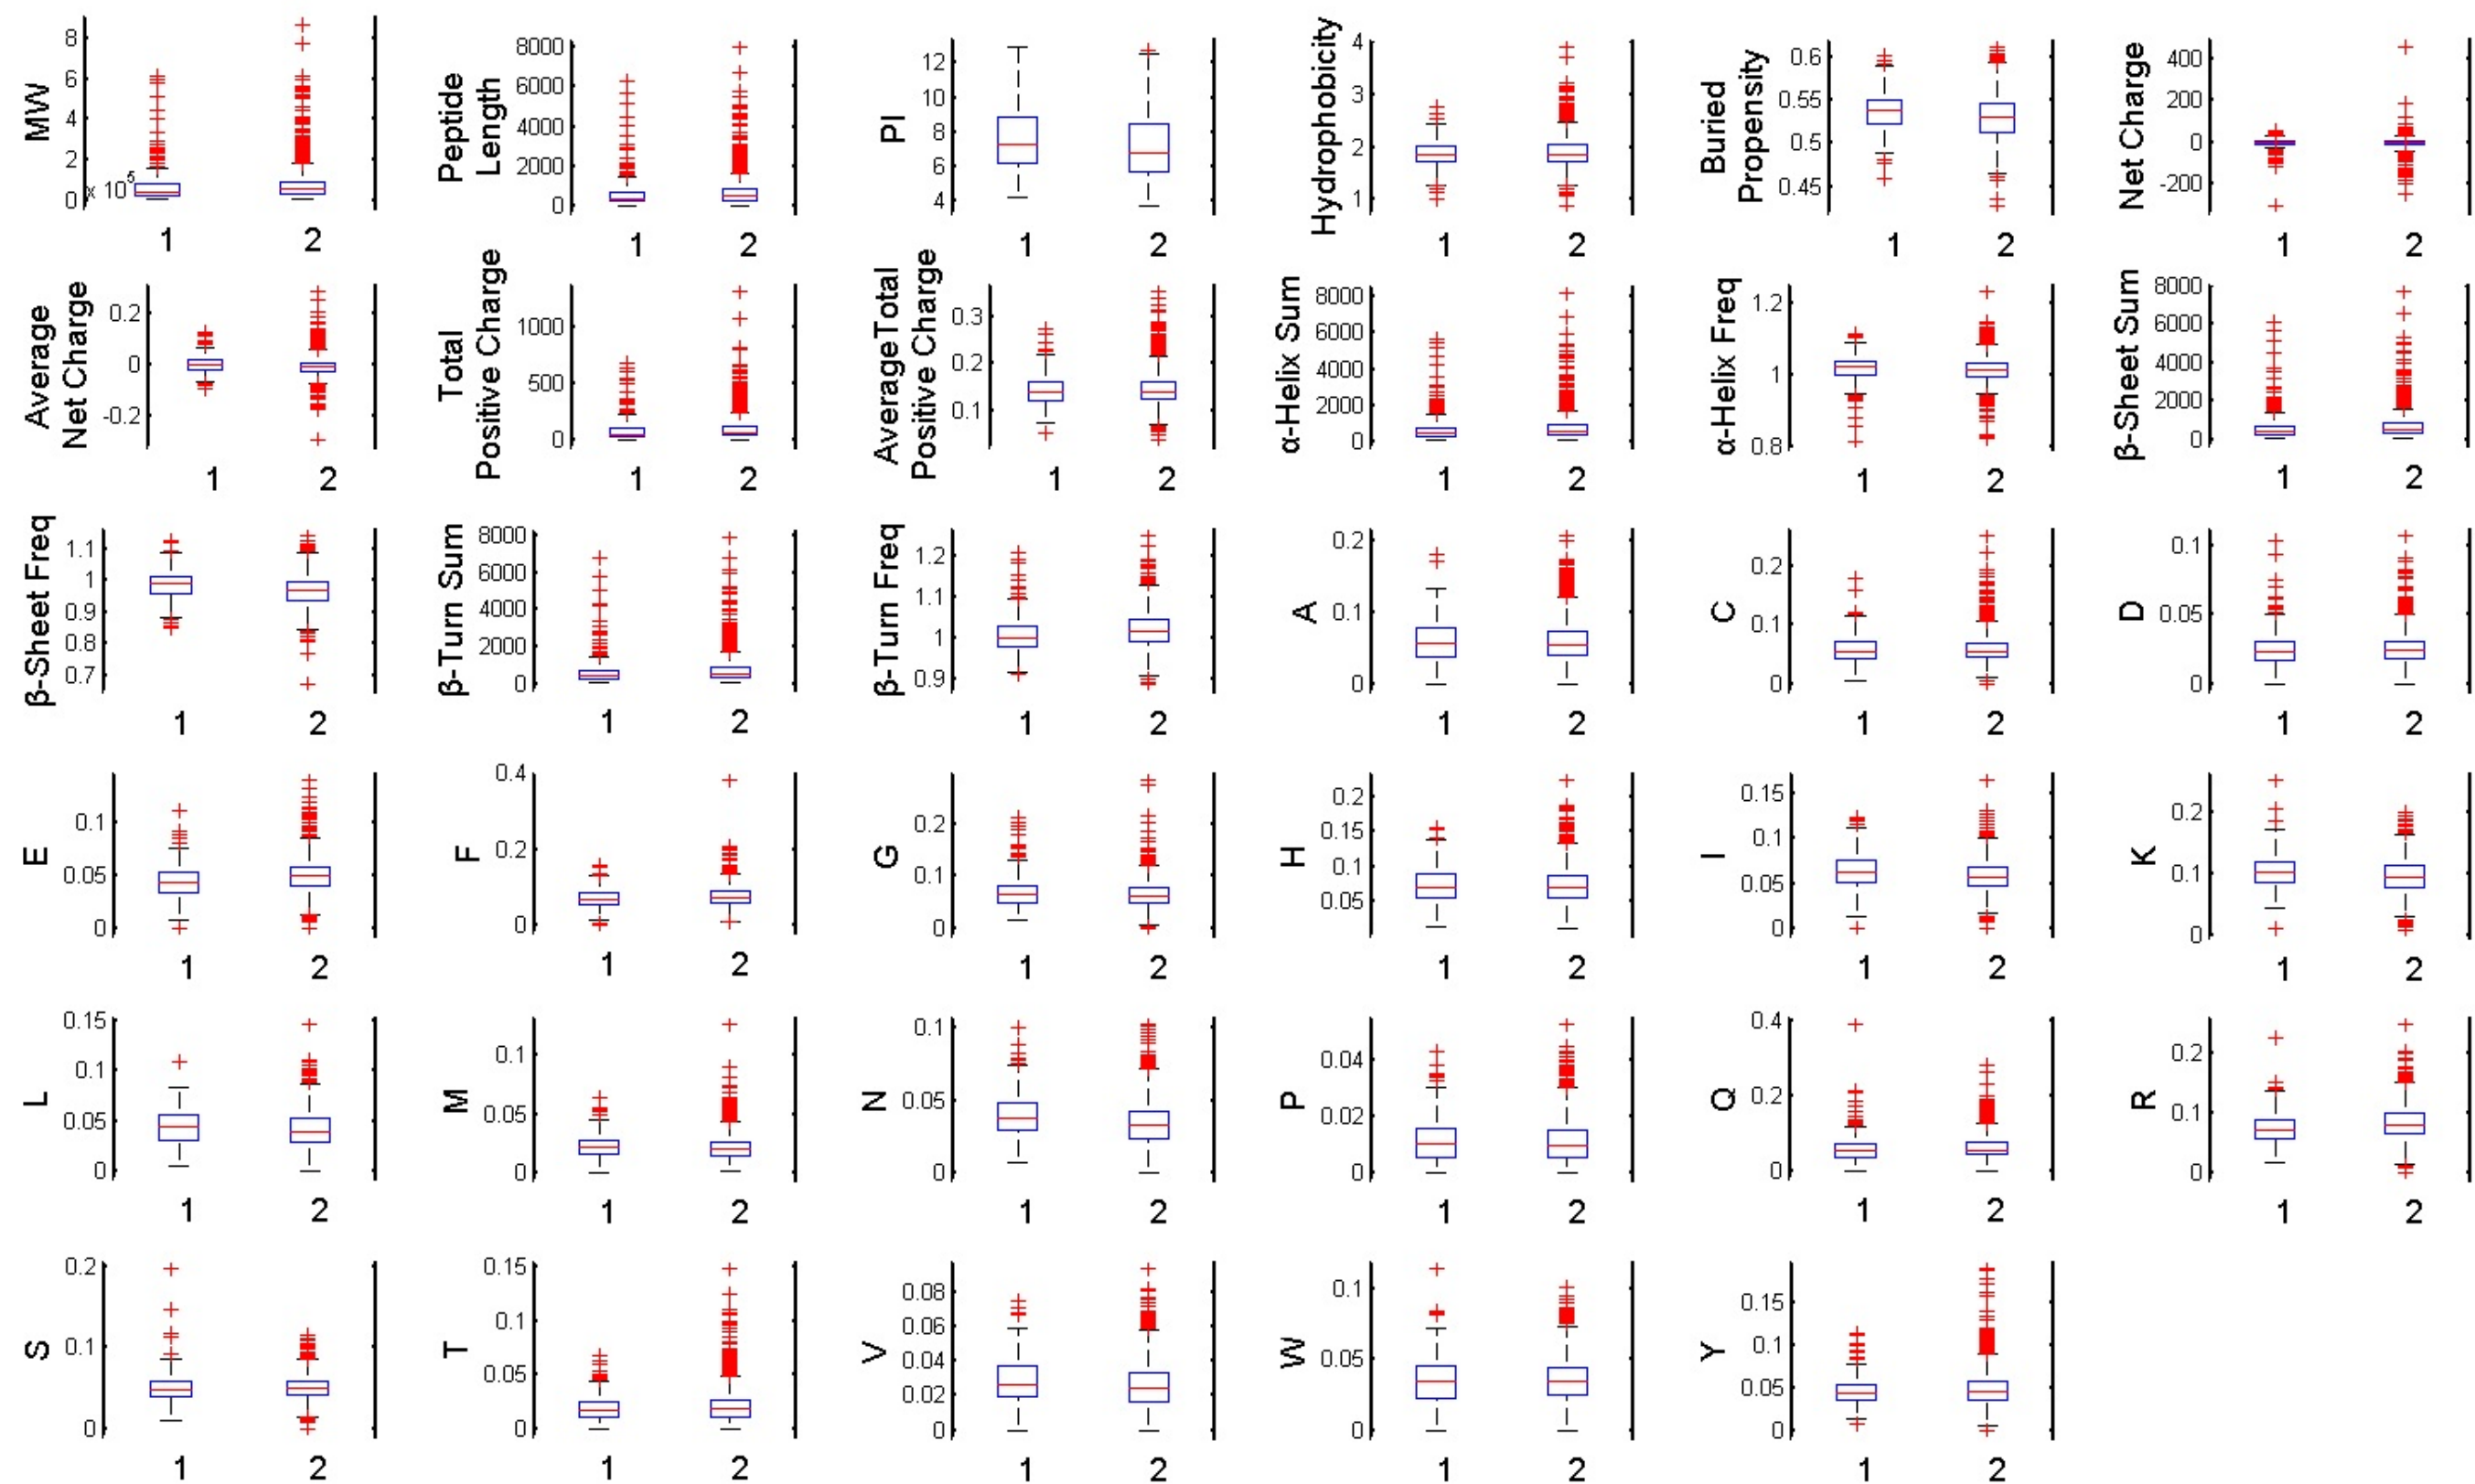

Supplement: c4an02119c1.pdf [file c4an02119c1.pdf]

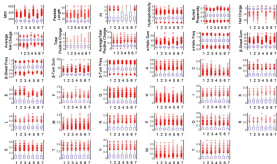

Supplement: c4an02119c2.pdf [file c4an02119c2.pdf]
